# Supplementary material for: Halogen-bond-promoted direct cross-coupling of ethyl 3-bromo-3-alkyl-2,2-difluoropropanoates with coumarins/quinolinones
Source: Royal Society of Chemistry journal article supplement (doi:10.1039/d4qo00484a), 2024-01-01

## Supporting Information for

### Halogen-Bond-Promoted Direct Cross-Coupling of Ethyl 3-bromo-3-alkyl-2,2-difluoropropanoate with Coumarins/Quinolinones

Guoliang Pu,<sup>a</sup> Shi-Yuan Song,<sup>b</sup> Jian Yang,<sup>a</sup> Peng Guo,<sup>a</sup> Jia Jia,<sup>a</sup> Peijun Liu,<sup>a</sup> Xuefei Li,<sup>a,d\*</sup> Ping Liu,<sup>b\*</sup> and Chun-Yang He<sup>a,c\*</sup>

<sup>a.</sup> Key Laboratory of Biocatalysis & Chiral Drug Synthesis of Guizhou Province, Generic Drug Research Center of Guizhou Province, Zunyi Medical University, Zunyi, Guizhou, P. R. China. \* hechy2002@163.com

<sup>b.</sup> Key Laboratory of Clinical Pharmacy of Guizhou Province, School of Pharmacy, Zunyi Medical University, Zunyi, Guizhou, China\* lpiuing@163.com

<sup>c.</sup> Key Laboratory of Basic Pharmacology of Ministry of Education and Joint International Research Laboratory of Ethnomedicine of Ministry of Education. School of Pharmacy, Zunyi Medical University, Zunyi, Guizhou, P. R. China

<sup>d.</sup> Department of Nuclear Medicine, Affiliated Hospital of Zunyi Medical University, Zunyi, Guizhou, P. R. China.

## Table of Contents

|                                                                                                                              |     |
|------------------------------------------------------------------------------------------------------------------------------|-----|
| 1. General information .....                                                                                                 | S1  |
| 2. General procedure for the synthesis of Ethyl 3-bromo-3-alkyl-2,2-difluoropropanoate                                       | S1  |
| 3. General procedure for cross-coupling of Ethyl 3-bromo-3-alkyl-2,2-difluoropropanoate<br>with coumarins/quinolinones ..... | S10 |
| 4. Detailed procedure for the gram scale synthesis.....                                                                      | S11 |
| 5. Mechanism studies.....                                                                                                    | S12 |
| 6. Materials and methods of tumor cell growth inhibition test.....                                                           | S15 |
| 7. Characterization data for the products.....                                                                               | S16 |
| 8. Reference.....                                                                                                            | S33 |
| 9. Copies of $^1\text{H}$ NMR, $^{19}\text{F}$ NMR and $^{13}\text{C}$ NMR charts of the Products .....                      | S34 |

## 1. General information

$^1\text{H}$  NMR and  $^{13}\text{C}$  NMR spectra were recorded on an Agilent MR400 spectrometer.  $^{19}\text{F}$  NMR was recorded on an Agilent MR400 spectrometer. Chemical shifts ( $\delta$ ) are reported in ppm, and coupling constants ( $J$ ) are in Hertz (Hz). The following abbreviations were used to explain the multiplicities: s = singlet, d = doublet, t = triplet, q = quartet, m = multiplet, br = broad. NMR yield was determined by  $^{19}\text{F}$  NMR using fluorobenzene as an internal standard before working up the reaction. High-resolution mass spectra were recorded on a Thermo Scientific Q Exactive HF with Fourier-transform (orbitrap) mass spectrometer and Agilent Technologies 7250 GCQTOF in laboratory of mass spectrometry analysis at Shanghai Institute of Organic Chemistry. Melting points were taken on a SGW X-4 Melting Point Apparatus. The optical absorption spectra were determined by the Puxi T6 ultraviolet-visible Spectrophotometer.

**Materials:** All reagents were used as received from commercial sources, unless specified otherwise, or prepared as described in the literature. All reagents were weighed and handled in air at room temperature. LED (390-395 nm, 410-415 nm, 440-445 nm) were purchased from WATTCAS<sup>TM</sup>, and relevant experiments were performed in a WP-TEC-1020SL parallel reactor from WATTCAS<sup>TM</sup>.

## 2. General procedure for the synthesis of Ethyl 3-bromo-3-alkyl-2,2-difluoropropanoate

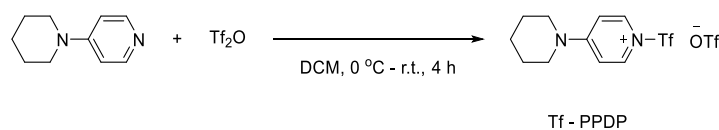

General procedure for the synthesis of Tf - PPDP (**step 1**)<sup>[1]</sup>. ( $\text{CF}_3\text{SO}_2$ )<sub>2</sub>O (16.1 mL, 96.0 mmol, 1.2 equiv.) was added into a solution of 4-piperidin-1-ylpyridine

(13.0 g, 80.0 mmol, 1.0 equiv.) in DCM (120.0 mL) at 0 °C. After addition is completed, the mixture was warmed to room temperature and stirred for 4 h. Upon completion, 80 mL of n-hexane was added and the crude product then precipitated out of the solution. The solid was filtered and washed with hexane (100 mL × 2), then the pure product was obtained as a white powder after dried under reduced pressure (28.8 g, 81%).

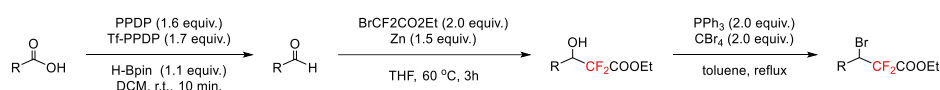

Alkyl carboxylic acids

Alkyl aldehydes

Ethyl 3-alkyl-3-hydroxy-2,2-difluoro-propanoate

Ethyl 3-bromo-3-alkyl-2,2-difluoropropanoate

General procedure for the synthesis of alkyl aldehydes (**step 2**)<sup>[1]</sup>. To a 100 mL schlenk tube equipped with a magnetic stirring bar, alkyl carboxylic acid (4.0 mmol, 1.0 equiv.), PPDP (6.4 mmol, 1.6 equiv.) and DCM (50.0 mL) were added in air, followed by Tf-PPDP (6.8 mmol, 1.7 equiv.) and HBpin (4.4 mmol, 1.1 equiv.). After the reaction was stirred for 10 min, the crude mixture was quenched by H<sub>2</sub>O and extracted by DCM (3 x 20.0 mL). The combined organic layers were dried over anhydrous Na<sub>2</sub>SO<sub>4</sub>. After the solvent was removed under reduced pressure, the resulting residue was purified by flash column chromatography on silica gel and eluted with petroleum ether/ethyl acetate to afford the desired alkyl aldehydes.

General procedure for the synthesis of ethyl 3-alkyl-3-hydroxy-2,2-difluoro-propanoate (**step 3**)<sup>[2]</sup>. Ethyl bromodifluoroacetate (5 mmol, 2.0 equiv) was added to a mixture of zinc dust (3.75 mmol, 1.5 equiv) in THF (7 mL) at room temperature under an argon atmosphere. After stirred for 5 min, alkyl aldehydes (2.5 mmol, 1.0 equiv) was added subsequently and the mixtures were refluxed for 3 h. After cooling down to room temperature, the reaction was quenched with sat. NH<sub>4</sub>Cl solution (7 mL). The aqueous layer was extracted with Et<sub>2</sub>O (15 mL × 3). The combined organic layer was washed with brine and dried over anhydrous Na<sub>2</sub>SO<sub>4</sub>. After the solvent was removed under reduced pressure, the

resulting residue was purified by flash column chromatography on silica gel and eluted with petroleum ether/ethyl acetate to afford the pure product.

General procedure for the synthesis of ethyl 3-bromo-3-alkyl-2,2-difluoropropanoate (**step 4**)<sup>[3]</sup>. To a solution of ethyl ethyl 3-alkyl-3-hydroxy-2,2-difluoro-propanoate (1.0 mmol, 1.0 equiv) and PPh<sub>3</sub> (2.0 mmol, 2.0 equiv) in toluene (10.0 mL), tetrabromomethane (2.0 mmol, 2.0 equiv) was added in one portion. The mixture was refluxed at 110 °C for 3 h. After cooling down to room temperature, the reaction was quenched with H<sub>2</sub>O (30 mL). The mixtures was extracted with EtOAc (20 mL × 3). The combined organic layers were washed with brine (30 mL), dried over anhydrous Na<sub>2</sub>SO<sub>4</sub> and concentrated. The pure product was obtained by flash chromatography on silica gel.

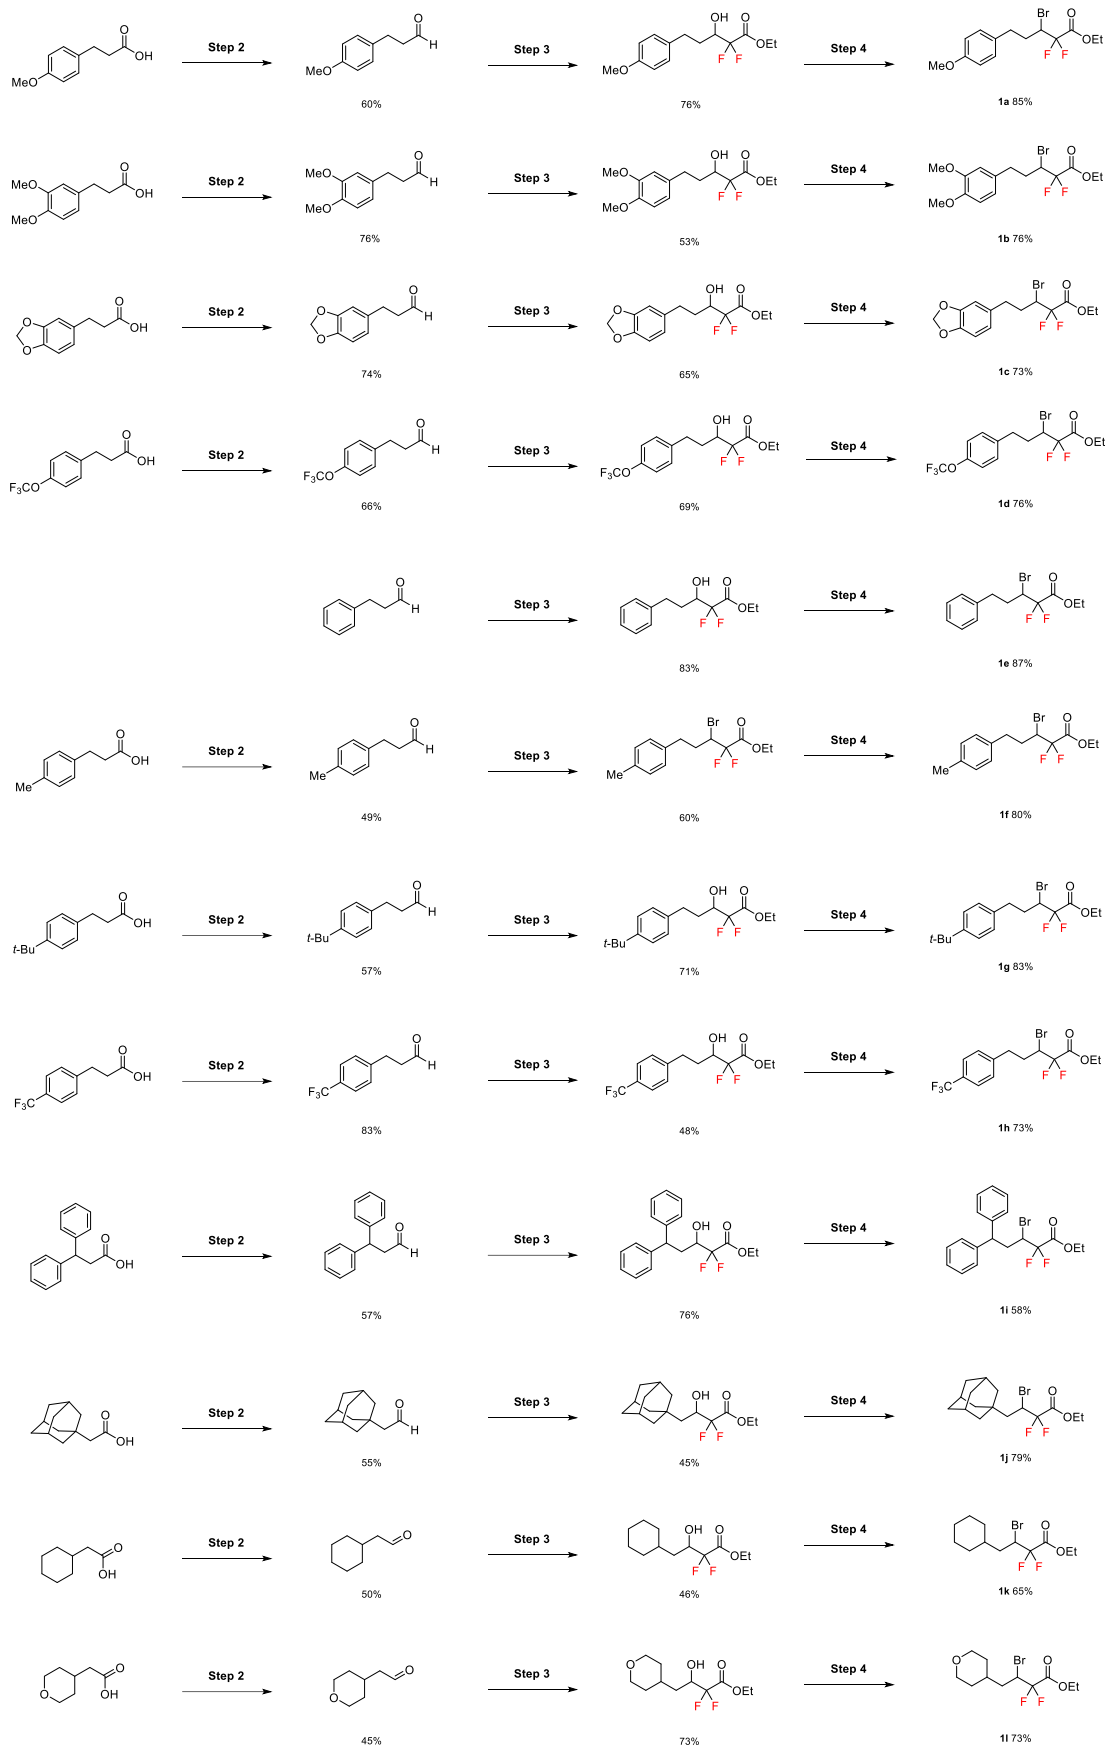

### ethyl 3-bromo-2,2-difluoro-5-(4-methoxyphenyl)pentanoate (1a)

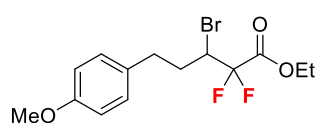

Obtained in 85% yield as a yellow oily liquid (298.5 mg, eluent: PE/EA = 40:1). **<sup>1</sup>H NMR** (400 MHz, CDCl<sub>3</sub>)  $\delta$  7.13 (d,  $J$  = 8.4 Hz, 2H), 6.85 (d,  $J$  = 8.0 Hz, 2H), 4.34 (q,  $J$  = 7.1 Hz, 2H), 4.21 – 4.11 (m, 1H), 3.80 (s, 3H), 2.99 – 2.93 (m, 1H), 2.73 – 2.65 (m, 1H), 2.31 – 2.23 (m, 1H), 2.20 – 2.10 (m, 1H), 1.34 (t,  $J$  = 7.2 Hz, 3H). **<sup>13</sup>C NMR** (101 MHz, CDCl<sub>3</sub>)  $\delta$  162.4 (t,  $J$  = 32.4 Hz), 158.3, 131.6, 129.5, 114.1, 113.6 (dd,  $J$  = 259.1 Hz,  $J$  = 254.3 Hz), 63.5, 55.3, 49.3 (dd,  $J$  = 28.1 Hz,  $J$  = 25.3 Hz), 32.1, 31.8, 13.9. **<sup>19</sup>F NMR** (376 MHz, CDCl<sub>3</sub>)  $\delta$  -105.75 (dd,  $J$  = 255.3 Hz,  $J$  = 9.0 Hz, 1F), -114.95 (dd,  $J$  = 254.9 Hz,  $J$  = 13.2 Hz, 1F). **HRMS (ESI)**: calculated for C<sub>14</sub>H<sub>17</sub>O<sub>3</sub>BrF<sub>2</sub>Na ([M+Na]<sup>+</sup>): 373.0221; Found: 373.0220.

### ethyl 3-bromo-5-(3,4-dimethoxyphenyl)-2,2-difluoropentanoate (1b)

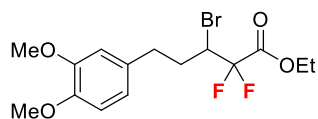

Obtained in 76% yield as a yellow oily liquid (289.7 mg, eluent: PE/EA = 40:1). **<sup>1</sup>H NMR** (400 MHz, CDCl<sub>3</sub>)  $\delta$  6.80 (d,  $J$  = 8.4 Hz, 1H), 6.75 – 6.71 (m, 2H), 4.32 (q,  $J$  = 7.2 Hz, 2H), 4.20 – 4.10 (m, 1H), 3.87 (s, 3H), 3.85 (s, 3H), 2.98 – 2.92 (m, 1H), 2.71 – 2.64 (m, 1H), 2.31 – 2.23 (m, 1H), 2.19 – 2.09 (m, 1H), 1.32 (t,  $J$  = 7.2 Hz, 3H). **<sup>13</sup>C NMR** (101 MHz, CDCl<sub>3</sub>)  $\delta$  162.2 (t,  $J$  = 32.4 Hz), 149.0, 147.6, 132.0, 120.4, 113.5 (dd,  $J$  = 259.1 Hz,  $J$  = 254.3 Hz), 111.6, 111.3, 63.4, 55.8 (d,  $J$  = 5.5 Hz), 55.7 (d,  $J$  = 6.0 Hz), 49.5 – 49.0 (m), 32.2, 31.9, 13.8 (d,  $J$  = 1.7 Hz). **<sup>19</sup>F NMR** (376 MHz, CDCl<sub>3</sub>)  $\delta$  -104.61 (d,  $J$  = 254.9 Hz, 1F), -114.08 (d,  $J$  = 254.2 Hz, 1F). **HRMS (ESI)**: calculated for C<sub>15</sub>H<sub>20</sub>O<sub>4</sub>BrF<sub>2</sub> ([M+H]<sup>+</sup>): 381.0508; Found: 381.0505.

### ethyl 5-(benzo[d][1,3]dioxol-5-yl)-3-bromo-2,2-difluoropentanoate (1c)

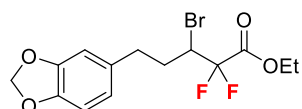

Obtained in 73% yield as a yellow oily liquid (266.6 mg, eluent: PE/EA = 40:1). **<sup>1</sup>H NMR** (400 MHz, CDCl<sub>3</sub>)  $\delta$  6.74 (d,  $J$  = 7.6 Hz, 1H), 6.68 – 6.65 (m, 2H), 5.92 (s, 2H), 4.34 (q,  $J$  = 7.2 Hz, 2H),

4.21 – 4.12 (m, 1H), 2.95 – 2.89 (m, 1H), 2.69 – 2.62 (m, 1H), 2.29 – 2.20 (m, 1H), 2.17 – 2.08 (m, 1H), 1.33 (t,  $J = 7.2$  Hz, 3H).  **$^{13}\text{C}$  NMR** (101 MHz,  $\text{CDCl}_3$ )  $\delta$  162.2 (t,  $J = 32.4$  Hz), 147.9, 146.2, 133.2, 121.4, 113.6 (dd,  $J = 258.9$  Hz,  $J = 254.2$  Hz), 108.8, 108.4, 100.9, 63.4, 49.5 – 48.9 (m), 32.4, 32.0, 13.8 (d,  $J = 2.0$  Hz).  **$^{19}\text{F}$  NMR** (376 MHz,  $\text{CDCl}_3$ )  $\delta$  -104.93 (d,  $J = 255.3$  Hz, 1F), -113.82 (d,  $J = 255.7$  Hz, 1F). **HRMS (ESI)**: calculated for  $\text{C}_{14}\text{H}_{16}\text{O}_4\text{BrF}_2$  ( $[\text{M}+\text{H}]^+$ ): 365.0195; Found: 365.0191.

#### ethyl 3-bromo-2,2-difluoro-5-(4-(trifluoromethoxy)phenyl)pentanoate (**1d**)

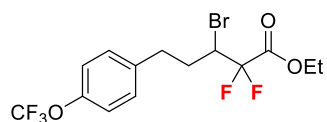

Obtained in 76% yield as a yellow oily liquid (307.9 mg, eluent: PE/EA = 40:1).  **$^1\text{H}$  NMR** (400 MHz,  $\text{CDCl}_3$ )  $\delta$  7.25 (d,  $J = 8.8$  Hz, 2H), 7.17 (d,  $J = 8.4$  Hz, 2H), 4.35 (q,  $J = 7.2$  Hz, 2H), 4.25 – 4.15 (m, 1H), 3.06 – 3.00 (m, 1H), 2.81 – 2.73 (m, 1H), 2.36 – 2.27 (m, 1H), 2.23 – 2.13 (m, 1H), 1.33 (t,  $J = 7.2$  Hz, 3H).  **$^{13}\text{C}$  NMR** (101 MHz,  $\text{CDCl}_3$ )  $\delta$  162.3 (t,  $J = 32.4$  Hz), 148.0 (q,  $J = 3.7$  Hz), 138.6, 129.9, 121.3, 120.6 (q,  $J = 257.5$  Hz), 113.6 (dd,  $J = 259.2$  Hz,  $J = 254.2$  Hz), 63.5, 49.4 – 48.8 (m), 32.2, 31.9, 13.7 (d,  $J = 2.2$  Hz).  **$^{19}\text{F}$  NMR** (376 MHz,  $\text{CDCl}_3$ )  $\delta$  -57.96 - -58.06 (m, 3F), -105.06 (d,  $J = 256.1$  Hz, 1F), -114.26 (d,  $J = 256.4$  Hz, 1F). **HRMS (ESI)**: calculated for  $\text{C}_{14}\text{H}_{15}\text{O}_3\text{BrF}_5$  ( $[\text{M}+\text{H}]^+$ ): 405.0119; Found: 405.0119.

#### ethyl 3-bromo-2,2-difluoro-5-phenylpentanoate (**1e**)

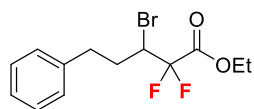

This compound is known<sup>[4]</sup>. Obtained in 87% yield as a yellow oily liquid (279.4 mg, eluent: PE/EA = 40:1).  **$^1\text{H}$  NMR** (400 MHz,  $\text{CDCl}_3$ )  $\delta$  7.37 – 7.33 (m, 2H), 7.29 – 7.24 (m, 3H), 4.36 (q,  $J = 7.2$  Hz, 2H), 4.28 – 4.18 (m, 1H), 3.09 – 3.02 (m, 1H), 2.82 – 2.74 (m, 1H), 2.40 – 2.31 (m, 1H), 2.27 – 2.17 (m, 1H), 1.35 (t,  $J = 7.2$  Hz, 3H).  **$^{13}\text{C}$  NMR** (101 MHz,  $\text{CDCl}_3$ )  $\delta$  162.3 (t,  $J = 32.4$  Hz), 139.7, 128.8 - 128.7 (m), 128.5, 126.7 - 126.5 (m), 113.6 (dd,  $J = 259.2$  Hz,  $J = 254.1$  Hz), 63.5, 49.7 – 49.0 (m), 32.8, 31.9,



13.9 (d,  $J = 7.2$  Hz).

### ethyl 3-bromo-2,2-difluoro-5-(*p*-tolyl)pentanoate (1f)

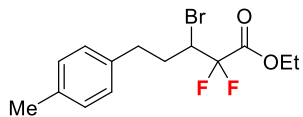

Obtained in 80% yield as a yellow oily liquid (268.2 mg, eluent: PE/EA = 40:1).  **$^1\text{H NMR}$**  (400 MHz,  $\text{CDCl}_3$ )  $\delta$  7.19 (dd,  $J = 10.4$  Hz,  $J = 8.4$  Hz, 4H), 4.39 (q,  $J = 7.2$  Hz, 2H), 4.32 – 4.23 (m, 1H), 3.09 – 3.02 (m, 1H), 2.82 – 2.75 (m, 1H), 2.41 – 2.33 (m, 4H), 2.29 – 2.20 (m, 1H), 1.39 (t,  $J = 7.0$  Hz, 3H).  **$^{13}\text{C NMR}$**  (101 MHz,  $\text{CDCl}_3$ )  $\delta$  162.2 (t,  $J = 32.5$  Hz), 136.5, 136.0, 129.4, 128.4, 113.6 (dd,  $J = 258.9$  Hz,  $J = 254.2$  Hz), 63.4, 49.7 – 49.1 (m), 32.2, 31.0, 20.9 (d,  $J = 3.2$  Hz), 13.8 (d,  $J = 2.6$  Hz).  **$^{19}\text{F NMR}$**  (376 MHz,  $\text{CDCl}_3$ )  $\delta$  -106.30 (dd,  $J = 255.3$  Hz,  $J = 9.8$  Hz, 1F), -113.11 (dd,  $J = 255.3$  Hz,  $J = 13.9$  Hz, 1F). **HRMS (ESI)**: calculated for  $\text{C}_{14}\text{H}_{17}\text{BrO}_2\text{BrF}_2\text{Na}$  ( $[\text{M}+\text{Na}]^+$ ): 357.0272; Found: 357.0269.

### ethyl 3-bromo-5-(4-(*tert*-butyl)phenyl)-2,2-difluoropentanoate (1g)

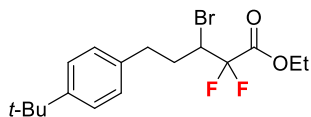

Obtained in 83% yield as a yellow oily liquid (313.13 mg, eluent: PE/EA = 40:1).  **$^1\text{H NMR}$**  (400 MHz,  $\text{CDCl}_3$ )  $\delta$  7.44 (d,  $J = 8.0$  Hz, 2H), 7.25 (d,  $J = 8.0$  Hz, 2H), 4.41 (q,  $J = 7.2$  Hz, 2H), 4.38 – 4.28 (m, 1H), 3.12 – 3.05 (m, 1H), 2.86 – 2.78 (m, 1H), 2.45 – 2.37 (m, 1H), 2.33 – 2.23 (m, 1H), 1.43 (s, 9H), 1.40 (t,  $J = 7.4$  Hz, 3H).  **$^{13}\text{C NMR}$**  (101 MHz,  $\text{CDCl}_3$ )  $\delta$  162.2 (t,  $J = 32.4$  Hz), 149.3, 136.5, 128.2, 125.6, 113.6 (dd,  $J = 259.1$  Hz,  $J = 254.4$  Hz), 63.3, 49.5 (t,  $J = 26.3$  Hz), 34.4, 32.2, 32.0, 30.4, 13.8 (d,  $J = 2.4$  Hz).  **$^{19}\text{F NMR}$**  (376 MHz,  $\text{CDCl}_3$ )  $\delta$  -106.49 (dd,  $J = 257.9$  Hz,  $J = 10.5$  Hz, 1F), -112.85 (dd,  $J = 255.3$  Hz,  $J = 13.2$  Hz, 1F). **HRMS (ESI)**: calculated for  $\text{C}_{17}\text{H}_{23}\text{BrO}_2\text{BrF}_2\text{Na}$  ( $[\text{M}+\text{Na}]^+$ ): 399.0742; Found: 399.0741.

### ethyl 3-bromo-2,2-difluoro-5-(4-(trifluoromethyl)phenyl)pentanoate (1h)

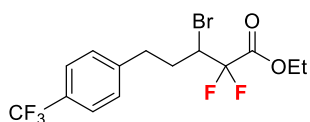

Obtained in 73% yield as a yellow oily liquid (284.1 mg, eluent: PE/EA = 40:1). **<sup>1</sup>H NMR** (400 MHz, CDCl<sub>3</sub>)  $\delta$  7.57 (d,  $J$  = 8.0 Hz, 2H), 7.34 (d,  $J$  = 8.0 Hz, 2H), 4.35 (q,  $J$  = 7.2 Hz, 2H), 4.24 – 4.14 (m, 1H), 3.11 – 3.04 (m, 1H), 2.86 – 2.78 (m, 1H), 2.39 – 2.30 (m, 1H), 2.25 – 2.15 (m, 1H), 1.33 (t,  $J$  = 7.0 Hz, 3H). **<sup>13</sup>C NMR** (101 MHz, CDCl<sub>3</sub>)  $\delta$  162.2 (t,  $J$  = 32.3 Hz), 143.9, 129.0 (d,  $J$  = 5.1 Hz), 128.9 (q,  $J$  = 35.9 Hz), 125.7, 124.4 (q,  $J$  = 273.1 Hz), 113.6 (dd,  $J$  = 259.4 Hz,  $J$  = 254.4 Hz), 63.6, 49.0 (td,  $J$  = 26.6 Hz,  $J$  = 6.8 Hz), 32.7, 31.7 13.8 (d,  $J$  = 3.0 Hz). **<sup>19</sup>F NMR** (376 MHz, CDCl<sub>3</sub>)  $\delta$  -62.29 - -62.38 (m, 3H), -104.83 (dd,  $J$  = 256.8 Hz,  $J$  = 7.5 Hz, 1F), -114.31 (d,  $J$  = 255.7 Hz, 1F). **HRMS (ESI)**: calculated for C<sub>14</sub>H<sub>18</sub>BrO<sub>2</sub>NBrF<sub>5</sub> ([M+NH<sub>4</sub>]<sup>+</sup>): 406.0436; Found: 406.0437.

#### ethyl 3-bromo-2,2-difluoro-5,5-diphenylpentanoate (1i)

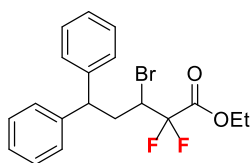

Obtained in 58% yield as a yellow oily liquid (230.4 mg, eluent: PE/EA = 40:1). **<sup>1</sup>H NMR** (400 MHz, CDCl<sub>3</sub>)  $\delta$  7.45 – 7.26 (m, 10H), 4.46 (dd,  $J$  = 12.0 Hz,  $J$  = 3.6 Hz, 1H), 4.38 (q,  $J$  = 7.2 Hz, 2H), 4.21 – 4.11 (m, 1H), 2.95 – 2.88 (m, 1H), 2.67 – 2.59 (m, 1H), 1.36 (t,  $J$  = 7.2 Hz, 3H). **<sup>13</sup>C NMR** (101 MHz, CDCl<sub>3</sub>)  $\delta$  162.2 (t,  $J$  = 32.4 Hz), 143.7, 141.4, 129.1, 128.7, 128.2, 127.6, 127.2, 126.7, 113.6 (dd,  $J$  = 259.3 Hz,  $J$  = 254.5 Hz), 63.5, 49.0 – 48.4 (m), 48.0, 36.1, 13.8 (d,  $J$  = 2.4 Hz). **<sup>19</sup>F NMR** (376 MHz, CDCl<sub>3</sub>)  $\delta$  -106.88 (dd,  $J$  = 255.7 Hz,  $J$  = 10.9 Hz, 1F), -111.87 (dd,  $J$  = 256.1 Hz,  $J$  = 14.3 Hz, 1F). **HRMS (ESI)**: calculated for C<sub>19</sub>H<sub>19</sub>O<sub>2</sub>BrF<sub>2</sub>Na ([M+Na]<sup>+</sup>): 419.0429; Found: 419.0425.

#### ethyl 4-((3*r*,5*r*,7*r*)-adamantan-1-yl)-3-bromo-2,2-difluorobutanoate (1j)

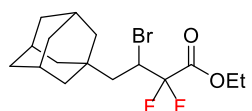

Obtained in 79% yield as a yellow oily liquid (288.5 mg, eluent: PE/EA = 40:1). **<sup>1</sup>H NMR** (400 MHz, CDCl<sub>3</sub>)  $\delta$  4.33 (q,  $J$  = 7.1 Hz, 2H), 4.29 – 4.22 (m, 1H), 1.96 – 1.89 (m, 4H), 1.81 – 1.75 (m, 1H), 1.71 – 1.60 (m, 7H), 1.55 (s, 5H), 1.34 (t,  $J$  = 7.2 Hz, 3H). **<sup>13</sup>C NMR** (101 MHz,

CDCl<sub>3</sub>)  $\delta$  162.5 (t,  $J$  = 32.5 Hz), 114.0 (dd,  $J$  = 258.9 Hz,  $J$  = 254.0 Hz), 63.4, 44.9, 43.4 – 42.8 (m), 42.3, 36.8, 32.3, 28.5, 13.9 (d,  $J$  = 3.0 Hz). **<sup>19</sup>F NMR** (376 MHz, CDCl<sub>3</sub>)  $\delta$  -105.46 (d,  $J$  = 254.2 Hz, 1F), -113.99 (dd,  $J$  = 253.8 Hz,  $J$  = 10.1 Hz, 1F). **HRMS (ESI)**: calculated for C<sub>16</sub>H<sub>23</sub>O<sub>2</sub>BrF<sub>2</sub>Na ([M+Na]<sup>+</sup>): 387.0742; Found: 387.0740.

### ethyl 3-bromo-4-cyclohexyl-2,2-difluorobutanoate (1k)

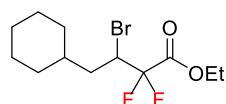

Obtained in 65% yield as a yellow oily liquid (206.8 mg, eluent: PE/EA = 40:1). **<sup>1</sup>H NMR** (400 MHz, CDCl<sub>3</sub>)  $\delta$  4.33 (q,  $J$  = 7.1 Hz, 2H), 4.30 – 4.26 (m, 1H), 1.84 – 1.53 (m, 8H), 1.33 (t,  $J$  = 7.0 Hz, 3H), 1.28 – 0.96 (m, 4H), 0.79 (qd,  $J$  = 11.9 Hz,  $J$  = 2.8 Hz, 1H). **<sup>13</sup>C NMR** (101 MHz, CDCl<sub>3</sub>)  $\delta$  162.4 (t,  $J$  = 32.5 Hz), 113.7 (dd,  $J$  = 258.8 Hz,  $J$  = 253.9 Hz), 63.4, 48.2 – 47.6 (m), 37.3, 34.6, 33.9, 31.1, 26.4, 26.2, 25.8, 13.9 (d,  $J$  = 3.0 Hz). **<sup>19</sup>F NMR** (376 MHz, CDCl<sub>3</sub>)  $\delta$  -106.01 (d,  $J$  = 254.5 Hz, 1F), -115.68 (dd,  $J$  = 254.5 Hz,  $J$  = 14.3 Hz, 1F). **HRMS (ESI)**: calculated for C<sub>12</sub>H<sub>20</sub>O<sub>2</sub>BrF<sub>2</sub> ([M+H]<sup>+</sup>): 313.0609; Found: 313.0606.

### ethyl 3-bromo-2,2-difluoro-4-(tetrahydro-2H-pyran-4-yl)butanoate (1l)

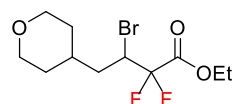

Obtained in 73% yield as a yellow oily liquid (230.1 mg, eluent: PE/EA = 40:1). **<sup>1</sup>H NMR** (400 MHz, CDCl<sub>3</sub>)  $\delta$  4.30 (q,  $J$  = 7.2 Hz, 2H), 4.27 – 4.22 (m, 1H), 3.93 – 3.87 (m, 2H), 3.38 – 3.29 (m, 2H), 1.88 – 1.68 (m, 3H), 1.62 – 1.53 (m, 2H), 1.40 – 1.32 (m, 1H), 1.30 (t,  $J$  = 7.2 Hz, 3H), 1.14 (qd,  $J$  = 13.5 Hz,  $J$  = 4.4 Hz, 1H). **<sup>13</sup>C NMR** (101 MHz, CDCl<sub>3</sub>)  $\delta$  162.2 (t,  $J$  = 32.3 Hz), 113.5 (dd,  $J$  = 259.2 Hz,  $J$  = 254.2 Hz), 67.7 (d,  $J$  = 6.8 Hz), 67.4 (d,  $J$  = 6.8 Hz), 63.4, 47.2 – 46.7 (m), 36.7, 33.3, 32.2, 31.1, 13.8 (d,  $J$  = 2.0 Hz). **<sup>19</sup>F NMR** (376 MHz, CDCl<sub>3</sub>)  $\delta$  -105.00 (d,  $J$  = 254.6 Hz, 1F), -115.00 (d,  $J$  = 255.7 Hz, 1F). **HRMS (ESI)**: calculated for C<sub>11</sub>H<sub>18</sub>O<sub>3</sub>BrF<sub>2</sub> ([M+H]<sup>+</sup>): 315.0402; Found: 315.0398.

### 3. General procedure for cross-coupling of Ethyl 3-bromo-3-alkyl-2,2-difluoropropanoate with coumarins/quinolinones

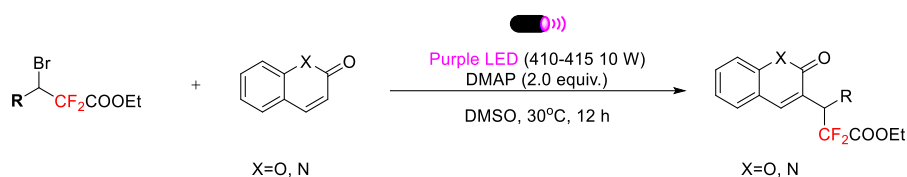

A 25 mL oven-dried Schlenk tube equipped with a magnetic stirrer bar was charged with the heterocycles (1.6 mmol, 8.0 equiv), DMAP (0.4 mmol, 2.0 equiv). The tube was evacuated and backfilled with argon for three times, followed by the addition of dry DMSO (1.0 mL) and Ethyl 3-bromo-3-alkyl-2,2-difluoropropanoate (0.2 mmol, 1.0 equiv). The tube was screw capped and heated to 30°C (heat was produced by LED) under irradiation of purple LED (410-415 nm, the set-up is detailed in Figure S1). After stirring for 12 h, the reaction mixture was then quenched with saturated NaCl solution and diluted with ethyl acetate. The organic layer was washed with brine, dried over anhydrous Na<sub>2</sub>SO<sub>4</sub>, and concentrated under reduced pressure. The product was purified with silica gel chromatography.

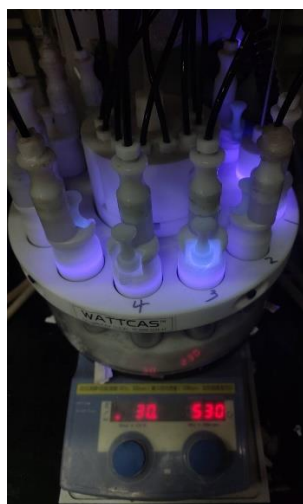

Figure S1. experiment set-up

#### 4. Detailed procedure for the gram scale synthesis

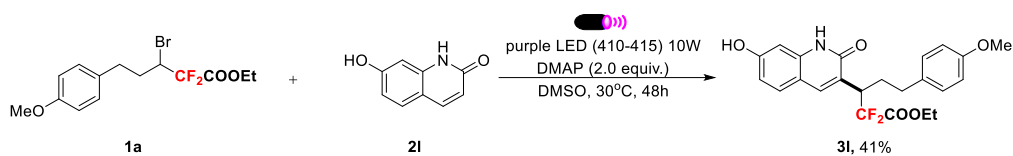

A 50 mL oven-dried Schlenk tube equipped with a magnetic stirrer bar was charged with **2I** (40 mmol, 8.0 equiv), DMAP (10 mmol, 2.0 equiv). The tube was evacuated and backfilled with argon for three times, followed by the addition of dry DMSO (25 mL) and **1a** (5 mmol, 1.0 equiv). The tube was screw capped and heated to 30°C (heat was produced by LEDs) under irradiation of purple LEDs (410-415 nm, the set-up is detailed in Figure S2). After stirring for 48h, the reaction mixture was then quenched with saturated NaCl solution and diluted with ethyl acetate. The organic layer was washed with brine, dried over anhydrous Na<sub>2</sub>SO<sub>4</sub>, and concentrated under reduced pressure. The product (884.4 mg, 41% yield) was purified with silica gel chromatography to give corresponding pure product. recovery ratio of coumarin: 81% (5.21 g).

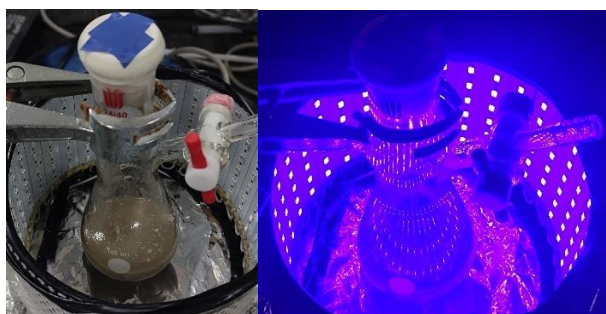

Figure S2. experiment set-up

## 5. Mechanism studies

### 5.1 Addition of radical and SET inhibitors

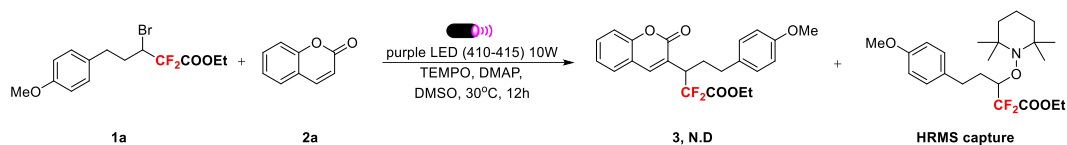

A 25 mL oven-dried Schlenk tube equipped with a magnetic stirrer bar was charged with the **2a** (0.8 mmol, 8.0 equiv), DMAP (0.2 mmol, 2.0 equiv), TEMPO (0.2 mmol, 2.0 equiv). The tube was evacuated and backfilled with argon for three times, followed by the addition of dry DMSO (0.5 mL) and **1a** (0.1 mmol, 1.0 equiv). The tube was screw capped and heated to 30°C (heat was produced by LED) under irradiation of purple LED (410-415 nm). After stirring for 12 h, the reaction mixture was cooled to room temperature, the reaction solution was diluted with 2 mL ethyl acetate, pretreatment and monitored by TLC, F-NMR and sent to HRMS. The results indicated that the reaction was totally suppressed by the addition of a radical scavenger TEMPO, which suggests that the involvement of radical intermediates is likely during the reaction.

#### High resolution ESI-MS and MS/MS experiments for detecting TEMPO complex

High resolution ESI-MS and MS/MS spectra were recorded on a Q Exactive HF Orbitrap mass spectrometer (Thermo Fisher Scientific Inc.) equipped with ESI ion source. The ESI conditions were: spray voltage 3500 V; capillary temperature, 275°C; sheath gas flow rate 35 arb. units. Data acquisition and analysis were done with the Thermo Xcalibur (version 4.2.47) software package. The elemental composition analysis of the ion at  $m/z$  428.2602 by HRMS (Figure S3 and S4) supported the proposed structure of TEMPO complex.

PGL-2-30 #22-53 RT: 0.05-0.12 AV: 32  
T: FTMS + p ESI Full ms [100.0000-1000.

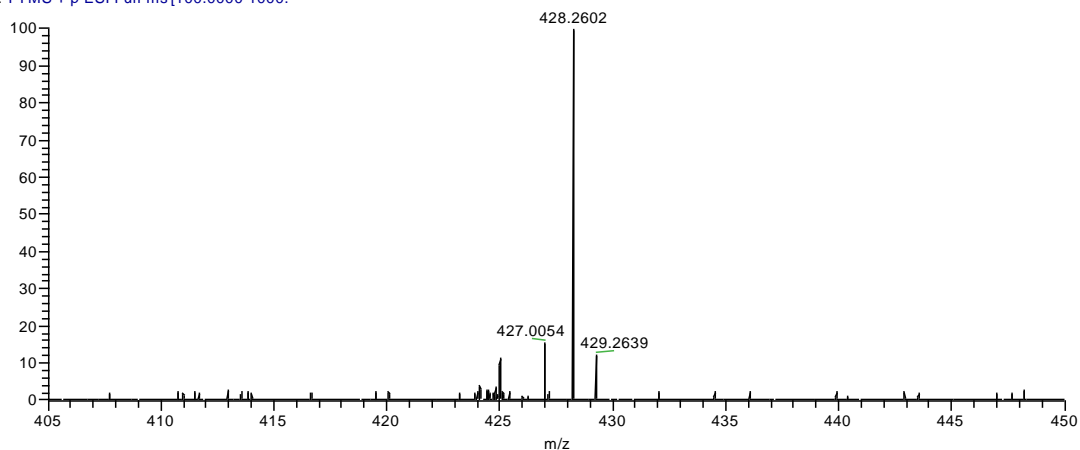

Figure S3. High resolution ESI-MS spectrum of TEMPO complex calculated for  $C_{23}H_{36}O_4NF_2$  ( $[M+H]^+$ ): 428.2607; Found: 428.2602.

Elemental composition search on mass 428.2602

m/z = 423.2602-433.2602

| m/z      | Theo. Mass | Delta (ppm) | RDB equiv. | Composition           |
|----------|------------|-------------|------------|-----------------------|
| 428.2602 | 428.2607   | -1.24       | 5.5        | $C_{23}H_{36}O_4NF_2$ |

Figure S4. Elemental composition analysis of the ion at  $m/z$  428.2602

## 5.2. UV-vis experiments

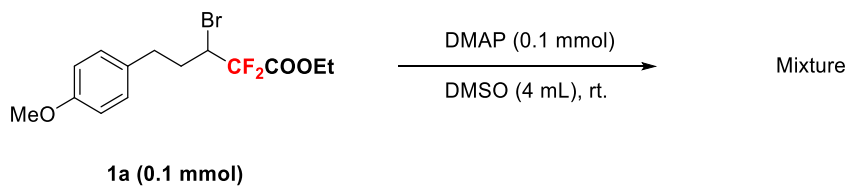

Figure S5. Optical absorption spectra studies.

| A<br>$\lambda/\text{nm}$ | <b>1a</b> | DMAP  | <b>1a + DMAP</b> |
|--------------------------|-----------|-------|------------------|
| 330                      | 0.097     | 0.025 | 0.305            |
| 340                      | 0.078     | 0.013 | 0.214            |
| 350                      | 0.060     | 0.010 | 0.159            |
| 360                      | 0.044     | 0.009 | 0.122            |
| 370                      | 0.033     | 0.007 | 0.101            |
| 380                      | 0.026     | 0.007 | 0.087            |
| 390                      | 0.022     | 0.006 | 0.075            |
| 400                      | 0.019     | 0.005 | 0.065            |
| 410                      | 0.017     | 0.005 | 0.057            |
| 420                      | 0.016     | 0.005 | 0.051            |
| 430                      | 0.015     | 0.005 | 0.045            |
| 440                      | 0.015     | 0.004 | 0.041            |
| 450                      | 0.014     | 0.004 | 0.037            |
| 460                      | 0.014     | 0.004 | 0.032            |
| 470                      | 0.013     | 0.004 | 0.029            |
| 480                      | 0.012     | 0.004 | 0.026            |
| 490                      | 0.011     | 0.004 | 0.022            |
| 500                      | 0.011     | 0.004 | 0.020            |
| 510                      | 0.010     | 0.004 | 0.019            |
| 520                      | 0.010     | 0.004 | 0.017            |
| 530                      | 0.010     | 0.005 | 0.017            |
| 540                      | 0.010     | 0.005 | 0.016            |
| 550                      | 0.010     | 0.004 | 0.015            |
| 560                      | 0.010     | 0.004 | 0.015            |
| 570                      | 0.009     | 0.005 | 0.014            |
| 580                      | 0.008     | 0.004 | 0.013            |
| 590                      | 0.009     | 0.004 | 0.012            |
| 600                      | 0.008     | 0.004 | 0.012            |



## **6. Materials and methods of tumor cell growth inhibition test**

### **6.1 Cell lines and culture condition**

Huh-7 cells and A549 cells were purchased from Servicebio Technology Co., Ltd., (catalog numbers STCC10102G and STCC10201 G, Wuhan, China), the complete medium consisted of DMEM medium and Ham's F-12K medium (Servicebio Technology Co., Ltd., catalog numbers G4202-500 and G4560-500, Wuhan, China), 1% penicillin and streptomycin (Cellcook Biotech Co., Ltd., catalog numbers CM1005-005, Guangzhou, China), and 10% FBS (Procell Life Science&Technology Co., Ltd., catalog numbers 164210-50, Wuhan, China) , respectively. The incubation environment was 37°C and 5 per cent CO<sub>2</sub>.

### **6.2 Tumour cell growth inhibition assay**

In vitro experiments were conducted using Huh-7 and A549 cells in the logarithmic growth phase. Huh7 and A549 cells were seeded into 96-well plates at a density of  $5 \times 10^3$  cells per well. A series of concentrations of the compound (0, 2, 4, 8, 16, 32 and 64 $\mu$ M) were used to evaluate the proliferative effect on Huh7 and A549 cells. After incubation for 48 hours, 100  $\mu$ l of CCK-8 containing solution (ratio of culture medium to CCK-8 was 9:1) (APExBIO, catalog numbers K1018, USA) was added, and incubated at 37°C for 1.5 hours. The corresponding absorbance was detected at a wavelength of 450nm. Absorbance values were converted to cell viability (%) by Microsoft Excel, and cell growth curves and IC<sub>50</sub> were generated by GraphPad Prism 10 software analysis.

## 7. Characterization data for the products

### ethyl 2,2-difluoro-5-(4-methoxyphenyl)-3-(2-oxo-2*H*-chromen-3-yl) pentanoate (3a)

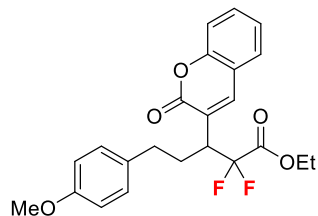

Obtained in 77% yield as a white solid (64.1 mg, eluent: PE/EA = 12:1), mp: 88 – 90°C, recovery ratio of coumarin: 71% (166.0 mg). **<sup>1</sup>H NMR** (400 MHz, CDCl<sub>3</sub>) δ 7.74 (s, 1H), 7.56 – 7.52 (m, 1H), 7.49 (dd, *J* = 8.0 Hz, *J* = 1.6 Hz, 1H), 7.34 – 7.28 (m, 2H), 7.03 (d, *J* = 8.4 Hz, 2H), 6.77 (d, *J* = 8.8 Hz, 2H), 4.24 (q, *J* = 7.2 Hz, 2H), 4.02 – 3.90 (m, 1H), 3.72 (s, 3H), 2.59 (t, *J* = 7.8 Hz, 2H), 2.32 – 2.24 (m, 1H), 2.15 – 2.04 (m, 1H), 1.25 (t, *J* = 7.0 Hz, 3H). **<sup>13</sup>C NMR** (101 MHz, CDCl<sub>3</sub>) δ 163.4 (t, *J* = 32.9 Hz), 161.4, 158.0, 153.2, 141.8, 132.7, 132.0, 129.2, 128.1, 124.6, 123.6 (d, *J* = 5.6 Hz), 118.9, 116.5, 115.7 (t, *J* = 256.3 Hz), 113.9, 63.2, 55.2, 42.0 (t, *J* = 22.9 Hz), 32.1, 29.8, 13.8. **<sup>19</sup>F NMR** (376 MHz, CDCl<sub>3</sub>) δ -108.27 (dd, *J* = 253.8 Hz, *J* = 13.9 Hz, 1F), -111.21 (dd, *J* = 253.8 Hz, *J* = 18.4 Hz, 1F). **HRMS (ESI)**: calculated for C<sub>23</sub>H<sub>23</sub>O<sub>5</sub>F<sub>2</sub> ([M+H]<sup>+</sup>): 417.1508; Found: 417.1506.

### ethyl 2,2-difluoro-5-(4-methoxyphenyl)-3-(6-methyl-2-oxo-2*H*-chromen-3-yl)pentanoate (3b)

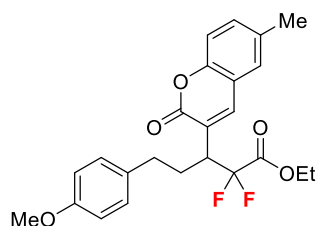

Obtained in 77% yield as a white solid (66.3 mg, eluent: PE/EA = 12:1), mp: 70 – 72°C, recovery ratio of coumarin: 76% (194.8 mg). **<sup>1</sup>H NMR** (400 MHz, CDCl<sub>3</sub>) δ 7.69 (s, 1H), 7.35 (dd, *J* = 8.4 Hz, *J* = 2.0 Hz, 1H), 7.29 (s, 1H), 7.23 (d, *J* = 8.4 Hz, 1H), 7.03 (d, *J* = 8.4 Hz, 2H), 6.77 (d, *J* = 8.4 Hz, 2H), 4.24 (q, *J* = 7.2 Hz, 2H), 4.01 – 3.89 (m, 1H), 3.74 (s, 3H), 2.57 (t, *J* = 7.8 Hz, 2H), 2.41 (s, 3H), 2.31 – 2.23 (m, 1H), 2.13 – 2.03 (m, 1H), 1.25 (t, *J* = 7.0 Hz, 3H). **<sup>13</sup>C NMR** (101 MHz, CDCl<sub>3</sub>) δ 163.5 (t, *J* = 32.8 Hz), 161.7, 158.1, 151.4, 141.9, 134.5, 133.1, 132.8, 129.3, 128.0, 123.5 (d, *J* = 5.4 Hz), 118.7, 116.4, 115.8 (t, *J* = 256.0 Hz), 114.0, 63.3, 55.3, 42.1 (t, *J* = 22.9 Hz), 32.2, 30.0,

20.9, 13.9.  $^{19}\text{F}$  NMR (376 MHz,  $\text{CDCl}_3$ )  $\delta$  -108.17 (dd,  $J = 253.8$  Hz,  $J = 13.5$  Hz, 1F), -111.35 (dd,  $J = 253.8$  Hz,  $J = 18.4$  Hz, 1F). HRMS (ESI): calculated for  $\text{C}_{24}\text{H}_{25}\text{O}_5\text{F}_2$  ( $[\text{M}+\text{H}]^+$ ): 431.1665; Found: 431.1664.

**ethyl 2,2-difluoro-5-(4-methoxyphenyl)-3-(7-methyl-2-oxo-2H-chromen-3-yl)pentanoate (3c)**

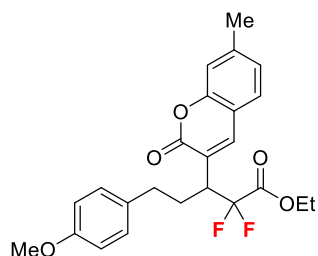

Obtained in 67% yield as a white solid (57.7 mg, eluent: PE/EA = 12:1), mp: 69 – 71°C, recovery ratio of coumarin: 82% (210.1 mg).  $^1\text{H}$  NMR (400 MHz,  $\text{CDCl}_3$ )  $\delta$  7.70 (s, 1H), 7.37 (d,  $J = 7.6$  Hz, 1H), 7.13 - 7.10 (m, 2H), 7.03 (d,  $J = 8.8$  Hz, 2H), 6.77 (d,  $J = 8.4$  Hz, 2H), 4.23 (q,  $J = 7.2$  Hz, 2H), 4.00 – 3.88 (m, 1H), 3.73 (s, 3H), 2.58 (t,  $J = 7.8$  Hz, 2H), 2.46 (s, 3H), 2.31 – 2.22 (m, 1H), 2.13 – 2.03 (m, 1H), 1.24 (t,  $J = 7.2$  Hz, 3H).  $^{13}\text{C}$  NMR (101 MHz,  $\text{CDCl}_3$ )  $\delta$  163.5 (t,  $J = 32.4$  Hz), 161.8, 158.1, 153.4, 143.5, 141.9, 132.9, 129.3, 127.9, 125.9, 122.3 (d,  $J = 5.8$  Hz), 116.7 (d,  $J = 2.4$  Hz), 116.6, 115.9 (t,  $J = 255.9$  Hz), 114.0, 63.2, 55.3 (d,  $J = 4.0$  Hz), 42.0 (t,  $J = 22.8$  Hz), 32.2, 29.9, 21.9, 13.9.  $^{19}\text{F}$  NMR (376 MHz,  $\text{CDCl}_3$ )  $\delta$  -108.08 (dd,  $J = 253.4$  Hz,  $J = 13.9$  Hz, 1F), -111.45 (dd,  $J = 253.4$  Hz,  $J = 19.2$  Hz, 1F). HRMS (ESI): calculated for  $\text{C}_{24}\text{H}_{25}\text{O}_5\text{F}_2$  ( $[\text{M}+\text{H}]^+$ ): 431.1665; Found: 431.1666.

**ethyl 2,2-difluoro-5-(4-methoxyphenyl)-3-(2-oxo-6-phenyl-2H-chromen-3-yl)pentanoate (3d)**

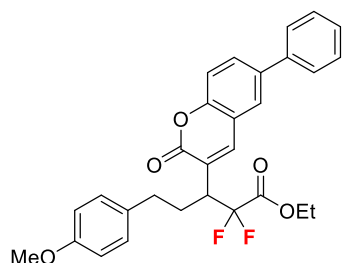

Obtained in 79% yield as a colorless liquid (77.8 mg, eluent: PE/EA = 12:1), recovery ratio of coumarin: 87% (309.3 mg).  $^1\text{H}$  NMR (400 MHz,  $\text{CDCl}_3$ )  $\delta$  7.81 (s, 1H), 7.76 (dd,  $J = 8.8$  Hz,  $J = 2.4$  Hz, 1H), 7.68 (d,  $J = 2.0$  Hz, 1H), 7.59 (d,  $J = 7.6$  Hz, 2H), 7.49 (t,  $J = 7.6$  Hz, 2H), 7.42 – 7.39 (m, 2H), 7.05 (d,  $J = 8.4$  Hz, 2H), 6.78 (d,  $J = 8.8$  Hz, 2H), 4.27 (q,  $J = 7.2$  Hz, 2H), 4.07 – 3.95 (m, 1H), 3.72 (s, 3H), 2.62 (t,  $J = 7.8$  Hz, 2H),

2.36 – 2.28 (m, 1H), 2.20 – 2.10 (m, 1H), 1.28 (t,  $J = 7.0$  Hz, 3H).  $^{13}\text{C}$  NMR (101 MHz,  $\text{CDCl}_3$ )  $\delta$  163.4 (t,  $J = 32.8$  Hz), 161.4, 158.1, 152.6, 141.9, 139.4, 138.0, 132.7, 130.9, 129.3 (d,  $J = 12.6$  Hz), 129.2 – 129.1 (m), 128.0 – 127.8 (m), 127.1 (d,  $J = 3.2$  Hz), 126.4 (d,  $J = 6.1$  Hz), 124.0 (d,  $J = 5.3$  Hz), 119.1, 116.9 (d,  $J = 11.1$  Hz), 115.8 (t,  $J = 256.2$  Hz), 113.9 (d,  $J = 5.2$  Hz), 63.3, 55.3 (d,  $J = 12.6$  Hz), 42.4 – 41.8 (m), 32.2, 29.9, 13.9 (d,  $J = 6.2$  Hz).  $^{19}\text{F}$  NMR (376 MHz,  $\text{CDCl}_3$ )  $\delta$  -107.97 (d,  $J = 252.3$  Hz, 1F), -110.87 (d,  $J = 253.0$  Hz, 1F). **HRMS (ESI)**: calculated for  $\text{C}_{29}\text{H}_{27}\text{O}_5\text{F}_2$  ( $[\text{M}+\text{H}]^+$ ): 493.1821; Found: 493.1819.

**ethyl 3-(6-bromo-2-oxo-2H-chromen-3-yl)-2,2-difluoro-5-(4-methoxyphenyl)pentanoate (3e)**

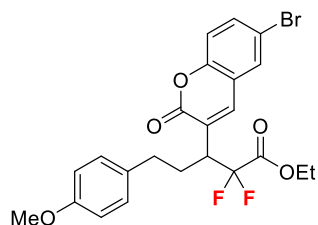

Obtained in 54% yield as a white solid (53.5 mg, eluent: PE/EA = 15:1), mp: 103 – 105°C, recovery ratio of coumarin: 67% (241.3 mg).  $^1\text{H}$  NMR (400 MHz,  $\text{CDCl}_3$ )  $\delta$  7.63 – 7.61 (m, 3H), 7.21 (d,  $J = 9.2$  Hz, 1H), 7.01 (d,  $J = 8.4$  Hz, 2H), 6.76 (d,  $J = 8.8$  Hz, 2H), 4.24 (q,  $J = 7.2$  Hz, 2H), 4.00 – 3.88 (m, 1H), 3.72 (s, 3H), 2.63 – 2.52 (m, 2H), 2.31 – 2.23 (m, 1H), 2.13 – 2.03 (m, 1H), 1.26 (t,  $J = 7.2$  Hz, 3H).  $^{13}\text{C}$  NMR (101 MHz,  $\text{CDCl}_3$ )  $\delta$  163.3 (t,  $J = 32.8$  Hz), 160.9, 158.2, 152.1, 140.5, 134.7, 132.6, 130.5, 129.3, 125.1 (d,  $J = 5.1$  Hz), 120.5, 118.4, 117.3, 115.6 (t,  $J = 257.0$  Hz), 114.0, 63.4, 55.3 (d,  $J = 3.8$  Hz), 42.2 (t,  $J = 24.3$  Hz), 32.2, 29.9, 13.9.  $^{19}\text{F}$  NMR (376 MHz,  $\text{CDCl}_3$ )  $\delta$  -109.20 (d,  $J = 254.5$  Hz, 1F), -111.39 (d,  $J = 257.2$  Hz, 1F). **HRMS (ESI)**: calculated for  $\text{C}_{23}\text{H}_{22}\text{O}_5\text{BrF}_2$  ( $[\text{M}+\text{H}]^+$ ): 495.0613; Found: 495.0612.

**ethyl 2,2-difluoro-3-(7-hydroxy-2-oxo-2H-chromen-3-yl)-5-(4-methoxyphenyl)pentanoate (3g)**

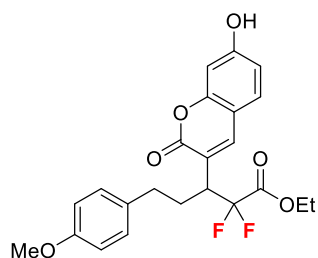

Obtained in 81% yield as a white solid (70.0 mg, eluent: PE/EA = 5:1), mp: 134 – 136°C, recovery ratio of coumarin: 78% (202.3 mg). **<sup>1</sup>H NMR** (400 MHz, CDCl<sub>3</sub>) δ 8.29 (s, 1H), 7.73 (s, 1H), 7.34 (d, *J* = 8.4 Hz, 1H), 7.03 (d, *J* = 8.4 Hz, 2H), 6.92 (d, *J* = 2.4 Hz, 1H), 6.84 (dd, *J* = 8.4 Hz, *J* = 2.4 Hz, 1H), 6.77 (d, *J* = 8.4 Hz, 2H), 4.27 (q, *J* = 7.1 Hz, 2H), 3.96 – 3.83 (m, 1H), 3.72 (s, 3H), 2.61– 2.56 (m, 2H), 2.33 – 2.24 (m, 1H), 2.17 – 2.06 (m, 1H), 1.27 (t, *J* = 7.2 Hz, 3H). **<sup>13</sup>C NMR** (101 MHz, CDCl<sub>3</sub>) δ 164.1 (t, *J* = 32.8 Hz), 163.1, 160.9 (d, *J* = 2.7 Hz), 158.0, 154.8, 143.2, 132.8, 129.6 (d, *J* = 4.9 Hz), 129.3 (d, *J* = 14.2 Hz), 118.4 (d, *J* = 4.7 Hz), 115.9 (t, *J* = 255.8 Hz), 114.1, 114.0 (d, *J* = 6.5 Hz), 112.3, 102.8 (d, *J* = 14.3 Hz), 63.5, 55.3 (d, *J* = 13.8 Hz), 42.2 – 41.6 (m), 32.1, 29.5, 13.8 (d, *J* = 7.0 Hz). **<sup>19</sup>F NMR** (376 MHz, CDCl<sub>3</sub>) δ -108.22 (dd, *J* = 251.9 Hz, *J* = 12.8 Hz, 1F), -111.89 (dd, *J* = 251.9 Hz, *J* = 19.6 Hz, 1F). **HRMS (ESI)**: calculated for C<sub>23</sub>H<sub>23</sub>O<sub>6</sub>F<sub>2</sub> ([M+H]<sup>+</sup>): 433.1457; Found: 433.1456.

**ethyl 2,2-difluoro-3-(7-methoxy-2-oxo-2H-chromen-3-yl)-5-(4-methoxyphenyl)pentanoate (3h)**

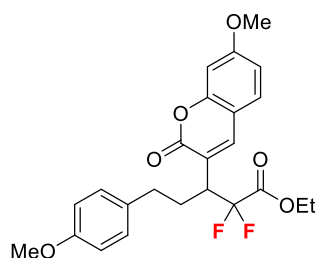

Obtained in 67% yield as a light-yellow oily liquid (59.8 mg, eluent: PE/EA = 10:1), recovery ratio of coumarin: 63% (177.6 mg). **<sup>1</sup>H NMR** (400 MHz, CDCl<sub>3</sub>) δ 7.68 (s, 1H), 7.38 (d, *J* = 8.4 Hz, 1H), 7.03 (d, *J* = 8.4 Hz, 2H), 6.86 (dd, *J* = 8.4 Hz, *J* = 2.4 Hz, 1H), 6.81 (d, *J* = 2.4 Hz, 1H), 6.77 (d, *J* = 8.4 Hz, 2H), 4.23 (q, *J* = 7.1 Hz, 2H), 3.97 – 3.85 (m, 4H), 3.74 (s, 3H), 2.57 (t, *J* = 7.8 Hz, 2H), 2.29 – 2.21 (m, 1H), 2.12 – 2.02 (m, 1H), 1.25 (t, *J* = 7.0 Hz, 3H). **<sup>13</sup>C NMR** (101 MHz, CDCl<sub>3</sub>) δ 163.5 (t, *J* = 33.0 Hz), 163.1, 161.9, 158.1, 155.2, 142.0, 132.9, 129.3, 129.2, 119.7 (d, *J* = 5.7 Hz), 115.9 (t, *J* = 256.0 Hz), 113.9, 112.9, 112.7, 100.6, 63.2, 55.9 (d, *J* = 4.3 Hz), 55.3 (d, *J* = 4.0 Hz), 42.0 (t, *J* = 22.7 Hz), 32.2, 29.9, 14.0. **<sup>19</sup>F NMR** (376 MHz,

CDCl<sub>3</sub>)  $\delta$  -108.11(dd,  $J$  = 252.7 Hz,  $J$  = 12.8 Hz, 1F), -111.58 (dd,  $J$  = 253.0 Hz,  $J$  = 18.4 Hz, 1F). **HRMS (ESI)**: calculated for C<sub>24</sub>H<sub>25</sub>O<sub>6</sub>F<sub>2</sub> ([M+H]<sup>+</sup>): 447.1614; Found: 447.1613.

**ethyl 3-(7-((1-ethoxy-1-oxopropan-2-yl)oxy)-2-oxo-2H-chromen-3-yl)-2,2-difluoro-5-(4-methoxyphenyl)pentanoate (3i)**

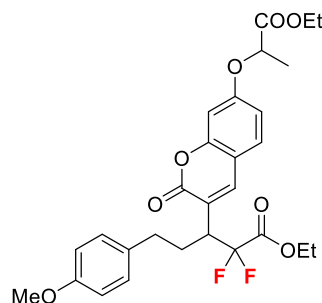

Obtained in 86% yield as a light-yellow oily liquid (91.6 mg, eluent: PE/EA = 10:1), recovery ratio of coumarin: 65% (272.7 mg). **<sup>1</sup>H NMR** (400 MHz, CDCl<sub>3</sub>)  $\delta$  7.67 (s, 1H), 7.39 (d,  $J$  = 8.4 Hz, 1H), 7.02 (d,  $J$  = 8.4 Hz, 2H), 6.86 (dt,  $J$  = 8.8 Hz,  $J$  = 2.8 Hz, 1H), 6.76 (d,  $J$  = 8.0 Hz, 2H), 6.72 (t,  $J$  = 3.2 Hz, 1H), 4.79 (q,  $J$  = 6.8 Hz, 1H), 4.23 (qd,  $J$  = 7.1 Hz,  $J$  = 2.8 Hz, 4H), 3.94 – 3.84 (m, 1H), 3.73 (s, 3H), 2.55 (t,  $J$  = 7.8 Hz, 2H), 2.28 – 2.19 (m, 1H), 2.11 – 2.01 (m, 1H), 1.66 (d,  $J$  = 7.2 Hz, 3H), 1.30 – 1.22 (m, 6H). **<sup>13</sup>C NMR** (101 MHz, CDCl<sub>3</sub>)  $\delta$  171.2 (d,  $J$  = 1.4 Hz), 163.4 (t,  $J$  = 32.9 Hz), 161.7 (d,  $J$  = 2.7 Hz), 160.8, 158.0, 154.8, 141.8, 132.8, 129.4, 129.3, 120.1 (d,  $J$  = 5.4 Hz), 115.8 (t,  $J$  = 260.0 Hz), 113.9, 113.3 (d,  $J$  = 11.7 Hz), 113.2 (d,  $J$  = 1.5 Hz), 101.5 (d,  $J$  = 12.1 Hz), 72.8 (d,  $J$  = 2.9 Hz), 63.2, 61.8, 55.2, 42.2 – 41.6 (m), 32.0 (d,  $J$  = 3.3 Hz), 29.8, 18.4, 14.3, 13.8. **<sup>19</sup>F NMR** (376 MHz, CDCl<sub>3</sub>)  $\delta$  -108.79 (ddd,  $J$  = 253.4 Hz,  $J$  = 45.1 Hz,  $J$  = 13.9 Hz, 1F), -112.01 (dm,  $J$  = 252.7 Hz, 1F). **HRMS (ESI)**: calculated for C<sub>28</sub>H<sub>31</sub>O<sub>8</sub>F<sub>2</sub> ([M+H]<sup>+</sup>): 533.1982; Found: 533.1978.

**ethyl 2,2-difluoro-3-(7-methoxy-8-(3-methylbut-2-en-1-yl)-2-oxo-2H-chromen-3-yl)-5-(4-methoxyphenyl)pentanoate (3j)**

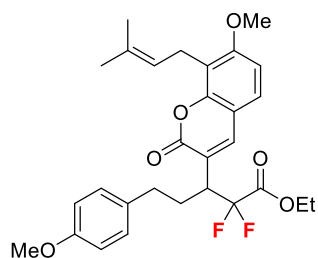

Obtained in 45% yield as a light-yellow oily liquid (46.3 mg, eluent: PE/EA = 13:1), recovery ratio of coumarin: 73% (356.7 mg). **<sup>1</sup>H NMR** (400 MHz, CDCl<sub>3</sub>)  $\delta$  7.65 (s, 1H), 7.30 (d,  $J$  = 8.8 Hz, 1H), 7.04 (d,  $J$  = 8.8 Hz, 2H),

6.85 (d,  $J = 8.8$  Hz, 1H), 6.78 (d,  $J = 8.8$  Hz, 2H), 5.24 – 5.21 (m, 1H), 4.23 (q,  $J = 8.2$  Hz, 2H), 3.98 – 3.87 (m, 4H), 3.74 (s, 3H), 3.53 (d,  $J = 7.2$  Hz, 2H), 2.57 (t,  $J = 7.8$  Hz, 2H), 2.29 – 2.21 (m, 1H), 2.12 – 2.00 (m, 1H), 1.84 (s, 3H), 1.68 (s, 3H), 1.23 (t,  $J = 7.0$  Hz, 3H).  **$^{13}\text{C}$  NMR** (101 MHz,  $\text{CDCl}_3$ )  $\delta$  163.6 (t,  $J = 33.0$  Hz), 161.9, 160.4, 158.0, 152.1, 142.3 (d,  $J = 6.8$  Hz), 133.0, 132.8, 129.3 (d,  $J = 12.9$  Hz), 126.7 (d,  $J = 13.7$  Hz), 121.1 (d,  $J = 16.7$  Hz), 119.5 (d,  $J = 5.8$  Hz), 117.3, 116.0 (t,  $J = 255.9$  Hz), 113.9 (d,  $J = 5.1$  Hz), 113.1, 107.7 (d,  $J = 9.5$  Hz), 63.1, 56.2 (d,  $J = 16.1$  Hz), 55.2 (d,  $J = 13.5$  Hz), 42.3 – 41.7 (m), 32.1, 29.9, 25.9 (d,  $J = 8.4$  Hz), 22.1 – 22.0 (m), 18.0 (d,  $J = 5.9$  Hz), 13.8 (d,  $J = 5.9$  Hz).  **$^{19}\text{F}$  NMR** (376 MHz,  $\text{CDCl}_3$ )  $\delta$  -107.36 (d,  $J = 253.0$  Hz, 1F), -111.36 (d,  $J = 252.7$  Hz, 1F). **HRMS (ESI)**: calculated for  $\text{C}_{29}\text{H}_{33}\text{O}_6\text{F}_2$  ( $[\text{M}+\text{H}]^+$ ): 515.2240; Found: 515.2236.

**ethyl 2,2-difluoro-5-(4-methoxyphenyl)-3-(2-oxo-1,2-dihydroquinolin-3-yl) pentanoate (3k)**

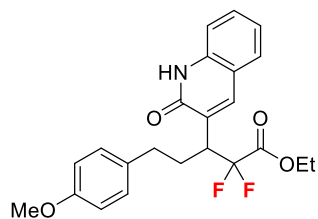

Obtained in 67% yield as a light-yellow oily liquid (55.7 mg, eluent: PE/EA = 3:1), recovery ratio of coumarin: 78% (181.2 mg).  **$^1\text{H}$  NMR** (400 MHz,  $\text{CDCl}_3$ )  $\delta$  13.0 (s, 1H), 7.94 (s, 1H), 7.62 (d,  $J = 7.6$  Hz, 1H), 7.59 – 7.56 (m, 1H), 7.49 (d,  $J = 8.4$  Hz, 1H), 7.27 (t,  $J = 7.0$  Hz, 1H), 7.09 (d,  $J = 8.8$  Hz, 2H), 6.79 (d,  $J = 8.4$  Hz, 2H), 4.39 - 4.28 (m, 1H), 4.20 (q,  $J = 7.2$  Hz, 2H), 3.74 (s, 3H), 2.62 (t,  $J = 7.8$  Hz, 2H), 2.42 – 2.34 (m, 1H), 2.26 – 2.16 (m, 1H), 1.18 (t,  $J = 7.2$  Hz, 3H).  **$^{13}\text{C}$  NMR** (101 MHz,  $\text{CDCl}_3$ )  $\delta$  164.3, 163.9 (t,  $J = 32.9$  Hz), 158.0, 139.6, 138.0, 133.3, 130.9 (d,  $J = 5.2$  Hz), 129.4 (d,  $J = 12.7$  Hz), 128.1 (d,  $J = 6.9$  Hz), 127.6 (d,  $J = 5.0$  Hz), 122.9 (d,  $J = 12.5$  Hz), 119.8, 116.4 (t,  $J = 255.4$  Hz), 116.0 (d,  $J = 8.7$  Hz), 113.8 (d,  $J = 5.8$  Hz), 62.9, 55.3 (d,  $J = 13.4$  Hz), 41.0 – 40.5 (m), 32.1, 30.2, 13.8 (d,  $J = 4.7$  Hz).  **$^{19}\text{F}$  NMR** (376 MHz,  $\text{CDCl}_3$ )  $\delta$  -107.10 (dd,  $J = 251.5$  Hz,  $J = 12.4$  Hz, 1F), -111.89 (dd,  $J = 251.9$  Hz,  $J = 19.6$  Hz, 1F). **HRMS (ESI)**: calculated for  $\text{C}_{23}\text{H}_{24}\text{O}_4\text{NF}_2$  ( $[\text{M}+\text{H}]^+$ ): 416.1668;

Found: 416.1667.

**ethyl 2,2-difluoro-3-(7-hydroxy-2-oxo-1,2-dihydroquinolin-3-yl)-5-(4-methoxyphenyl)pentanoate (3l)**

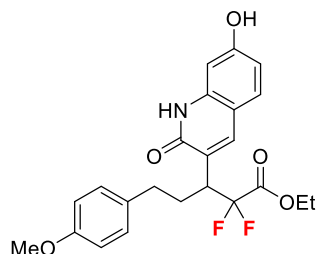

Obtained in 45% yield as a white solid (38.8 mg, eluent: PE/EA = 1:2), mp: 188 – 190°C, recovery ratio of coumarin: 85% (219.2 mg). **<sup>1</sup>H NMR** (400 MHz, DMSO-*d*<sub>6</sub>) δ 11.7 (s, 1H), 10.2 (s, 1H), 7.87 (s, 1H), 7.54 (d, *J* = 8.4 Hz, 1H), 7.04 (d, *J* = 8.4 Hz, 2H), 6.78 (d, *J* = 8.8 Hz, 2H), 6.73 (d, *J* = 2.0 Hz, 1H), 6.67 (dd, *J* = 8.0 Hz, *J* = 2.4 Hz, 1H), 4.15 (q, *J* = 6.5 Hz, 2H), 3.97 – 3.86 (m, 1H), 3.68 (s, 3H), 2.50 – 2.44 (m, 1H), 2.38 – 2.30 (m, 1H), 2.16 – 2.02 (m, 2H), 1.10 (t, *J* = 7.2 Hz, 3H). **<sup>13</sup>C NMR** (101 MHz, DMSO-*d*<sub>6</sub>) δ 163.3 (t, *J* = 32.9 Hz), 162.3, 160.0, 157.6, 140.2, 138.7, 132.9, 129.8, 129.4, 122.1 (d, *J* = 4.6 Hz), 116.5 (t, *J* = 254.3 Hz), 113.7, 112.5, 112.0, 99.6, 62.8, 55.0, 31.4, 39.0, 13.6. **<sup>19</sup>F NMR** (376 MHz, DMSO-*d*<sub>6</sub>) δ -108.26 (d, *J* = 247.8 Hz, 1F), -112.43 (d, *J* = 250.0 Hz, 1F). **HRMS (ESI)**: calculated for C<sub>23</sub>H<sub>24</sub>O<sub>5</sub>NF<sub>2</sub> ([M+H]<sup>+</sup>): 432.1617; Found: 432.1618.

**ethyl 2,2-difluoro-3-(6-fluoro-2-oxo-1,2-dihydroquinolin-3-yl)-5-(4-methoxyphenyl)pentanoate (3m)**

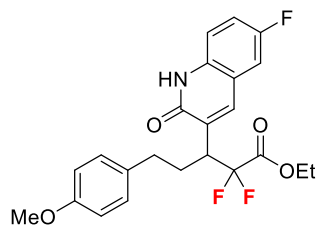

Obtained in 49% yield as a light-yellow oily liquid (42.5 mg, eluent: PE/EA = 3:1), recovery ratio of coumarin: 72% (187.94 mg). **<sup>1</sup>H NMR** (400 MHz, CDCl<sub>3</sub>) δ 13.21 (s, 1H), 7.88 (s, 1H), 7.47 – 7.44 (m, 1H), 7.35 – 7.29 (m, 2H), 7.07 (d, *J* = 8.4 Hz, 2H), 6.78 (d, *J* = 8.4 Hz, 2H), 4.37 – 4.25 (m, 1H), 4.20 (q, *J* = 7.2 Hz, 2H), 3.74 (s, 3H), 2.60 (t, *J* = 7.8 Hz, 2H), 2.41 – 2.32 (m, 1H), 2.23 – 2.13 (m, 1H), 1.19 (t, *J* = 7.0 Hz, 3H). **<sup>13</sup>C NMR** (101 MHz, CDCl<sub>3</sub>) δ 164.0, 163.8 (t, *J* = 32.9 Hz), 159.5, 158.0, 157.1, 138.8, 134.5, 133.1, 129.4 (d, *J* = 15.9 Hz), 120.4 (d, *J* = 9.0 Hz), 119.5 – 119.1 (m), 117.9 – 117.5 (m),



116.2 (t,  $J = 256.1$  Hz), 113.9 (d,  $J = 7.1$  Hz), 113.0 – 112.6 (m), 63.0, 55.2 (d,  $J = 14.6$  Hz), 41.0 – 40.4 (m), 32.1, 30.1, 13.8 (d,  $J = 6.2$  Hz).  **$^{19}\text{F}$  NMR** (376 MHz,  $\text{CDCl}_3$ )  $\delta$  -107.92 (dd,  $J = 252.7$  Hz,  $J = 13.2$  Hz, 1F), -111.96 (dd,  $J = 252.3$  Hz,  $J = 19.5$  Hz, 1F), -119.78 - -119.84 (m, 1F). **HRMS (ESI)**: calculated for  $\text{C}_{23}\text{H}_{23}\text{O}_4\text{NF}_3$  ( $[\text{M}+\text{H}]^+$ ): 434.1574; Found: 434.1569.

**ethyl 3-(6-chloro-2-oxo-1,2-dihydroquinolin-3-yl)-2,2-difluoro-5-(4-methoxyphenyl)pentanoate (3n)**

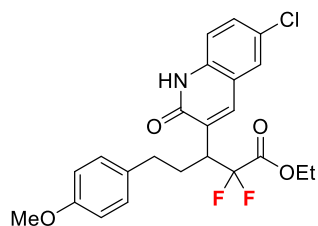

Obtained in 41% yield as a white solid (36.9 mg, eluent: PE/EA = 3:1), mp: 137 – 139°C, recovery ratio of coumarin: 83% (238.5 mg).  **$^1\text{H}$  NMR** (400 MHz,  $\text{CDCl}_3$ )  $\delta$  13.12 (s, 1H), 7.85 (s, 1H), 7.60 (d,  $J = 2.4$  Hz, 1H), 7.50 (dd,  $J = 8.8$  Hz,  $J = 2.4$  Hz, 1H), 7.40 (d,  $J = 8.8$  Hz, 1H), 7.06 (d,  $J = 8.4$  Hz, 2H), 6.77 (d,  $J = 8.4$  Hz, 2H), 4.35 – 4.27 (m, 1H), 4.20 (q,  $J = 7.1$  Hz, 2H), 3.74 (s, 3H), 2.59 (t,  $J = 7.8$  Hz, 2H), 2.40 – 2.31 (m, 1H), 2.22 – 2.12 (m, 1H), 1.19 (t,  $J = 7.2$  Hz, 3H).  **$^{13}\text{C}$  NMR** (101 MHz,  $\text{CDCl}_3$ )  $\delta$  164.1, 163.8 (t,  $J = 33.0$  Hz), 158.0, 138.5, 136.4, 133.0, 131.1, 129.4, 129.0, 128.2, 127.2, 120.7, 117.5, 116.2 (t,  $J = 256.1$  Hz), 113.9, 63.0, 55.3 (d,  $J = 3.1$  Hz), 40.7 (t,  $J = 22.4$  Hz), 32.1, 30.1, 13.9.  **$^{19}\text{F}$  NMR** (376 MHz,  $\text{CDCl}_3$ )  $\delta$  -108.11 (d,  $J = 251.9$  Hz, 1F), -111.92 (d,  $J = 253.4$  Hz, 1F). **HRMS (ESI)**: calculated for  $\text{C}_{23}\text{H}_{23}\text{O}_4\text{NCIF}_2$  ( $[\text{M}+\text{H}]^+$ ): 450.1278; Found: 450.1276.

**ethyl 3-(6-bromo-2-oxo-1,2-dihydroquinolin-3-yl)-2,2-difluoro-5-(4-methoxyphenyl)pentanoate (3o)**

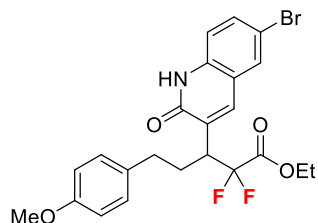

Obtained in 48% yield as a white solid (47.4 mg, eluent: PE/EA = 2:1), mp: 139 – 141°C, recovery ratio of coumarin: 80% (286.8 mg).  **$^1\text{H}$  NMR** (400 MHz,  $\text{CDCl}_3$ )  $\delta$  13.14 (s, 1H), 7.84 (s, 1H), 7.76 (d,  $J = 2.4$  Hz, 1H), 7.63 (dd,  $J = 8.8$  Hz,  $J = 2.4$  Hz, 1H), 7.34 (d,  $J = 8.4$  Hz, 1H), 7.05 (d,  $J = 8.4$

Hz, 2H), 6.77 (d,  $J = 8.4$  Hz, 2H), 4.34 – 4.27 (m, 1H), 4.20 (q,  $J = 7.8$  Hz, 2H), 3.74 (s, 3H), 2.59 (t,  $J = 7.6$  Hz, 2H), 2.40 – 2.31 (m, 1H), 2.21 – 2.12 (m, 1H), 1.19 (t,  $J = 7.2$  Hz, 3H).  $^{13}\text{C NMR}$  (101 MHz,  $\text{CDCl}_3$ )  $\delta$  164.1, 163.7 (t,  $J = 32.6$  Hz), 158.1, 138.4, 136.7, 133.8, 133.0, 130.3, 129.4, 129.0 (d,  $J = 5.1$  Hz), 121.2, 117.7, 116.2 (t,  $J = 256.3$  Hz), 115.5, 113.9, 63.0, 55.3 (d,  $J = 5.8$  Hz), 40.7 (t,  $J = 22.2$  Hz), 32.1, 30.1, 13.9.  $^{19}\text{F NMR}$  (376 MHz,  $\text{CDCl}_3$ )  $\delta$  -107.46 (dd,  $J = 252.7$  Hz,  $J = 13.2$  Hz, 1F), -111.26 (dd,  $J = 252.3$  Hz,  $J = 19.2$  Hz, 1F). **HRMS (ESI)**: calculated for  $\text{C}_{23}\text{H}_{23}\text{O}_4\text{NBrF}_2$  ( $[\text{M}+\text{H}]^+$ ): 494.0773; Found: 494.0771.

**ethyl 2,2-difluoro-5-(4-methoxyphenyl)-3-(1-methyl-2-oxo-1,2-dihydroquinolin-3-yl)pentanoate (3p)**

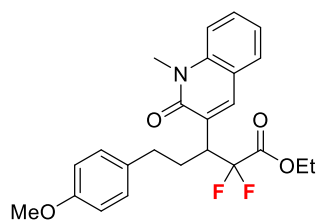

Obtained in 52% yield as a white solid (44.7 mg, eluent: PE/EA = 4:1), mp: 75 – 77°C, recovery ratio of coumarin: 65% (165.5 mg).  $^1\text{H NMR}$  (400 MHz,  $\text{CDCl}_3$ )  $\delta$  7.78(s, 1H), 7.60 – 7.57 (m, 2H), 7.35 (d,  $J = 8.8$  Hz, 1H), 7.26 (t,  $J = 7.6$  Hz, 1H), 7.04 (d,  $J = 8.4$  Hz, 2H), 6.77 (d,  $J = 8.8$  Hz, 2H), 4.36 – 4.27 (m, 1H), 4.23 (q,  $J = 7.1$  Hz, 2H), 3.76 (s, 3H), 3.74 (s, 3H), 2.62 – 2.48 (m, 2H), 2.32 – 2.24 (m, 1H), 2.15 – 2.07 (m, 1H), 1.21 (t,  $J = 7.2$  Hz, 3H).  $^{13}\text{C NMR}$  (101 MHz,  $\text{CDCl}_3$ )  $\delta$  163.8 (t,  $J = 32.8$  Hz), 162.2, 157.9, 139.4, 137.8, 133.4, 130.9, 129.3, 129.2, 127.7 (d,  $J = 5.2$  Hz), 122.4, 120.2, 116.3 (t,  $J = 251.0$  Hz), 114.1, 113.8, 62.9, 55.3, 41.6 (t,  $J = 22.5$  Hz), 32.3, 30.4, 30.3, 13.9.  $^{19}\text{F NMR}$  (376 MHz,  $\text{CDCl}_3$ )  $\delta$  -107.85 (dd,  $J = 252.7$  Hz,  $J = 9.0$  Hz, 1F), -111.09 (dd,  $J = 252.3$  Hz,  $J = 19.2$  Hz, 1F). **HRMS (ESI)**: calculated for  $\text{C}_{24}\text{H}_{26}\text{O}_4\text{NF}_2$  ( $[\text{M}+\text{H}]^+$ ): 430.1824; Found: 430.1826.

**ethyl 2,2-difluoro-5-(4-methoxyphenyl)-3-(1-methyl-2-oxo-1,2-dihydropyridin-3-yl)pentanoate (3q)**

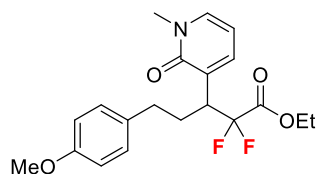

Obtained in 61% yield as a light-yellow oily liquid (46.3 mg, eluent: PE/EA = 1:2), recovery ratio of coumarin: 64% (111.7 mg). **<sup>1</sup>H NMR** (400 MHz, CDCl<sub>3</sub>) δ 7.44 (d, *J* = 6.8 Hz, 1H), 7.27 – 7.24 (m, 1H), 7.04 (d, *J* = 8.4 Hz, 2H), 6.79 (d, *J* = 8.8 Hz, 2H), 6.19 (t, *J* = 7.0 Hz, 1H), 4.21 (q, *J* = 7.2 Hz, 2H), 4.17 – 4.01 (m, 1H), 3.76 (s, 3H), 3.56 (s, 3H), 2.56 – 2.42 (m, 2H), 2.22 – 2.13 (m, 1H), 2.02 – 1.92 (m, 1H), 1.22 (t, *J* = 7.2 Hz, 3H). **<sup>13</sup>C NMR** (101 MHz, CDCl<sub>3</sub>) δ 163.9 (t, *J* = 33.1 Hz), 162.9, 157.9, 138.1, 137.7, 133.5, 129.3, 126.9 (d, *J* = 5.4 Hz), 116.4 (t, *J* = 249.7 Hz), 113.8, 105.6, 62.8, 55.3, 41.2 (t, *J* = 22.4 Hz), 38.4, 32.2, 30.3, 13.9. **<sup>19</sup>F NMR** (376 MHz, CDCl<sub>3</sub>) δ -108.16 (d, *J* = 251.2 Hz, 1F), -111.49 (dd, *J* = 251.5 Hz, *J* = 19.2 Hz, 1F). **HRMS (ESI)**: calculated for C<sub>20</sub>H<sub>24</sub>O<sub>4</sub>NF<sub>2</sub> ([M+H]<sup>+</sup>): 380.1668; Found: 380.1667.

**ethyl 2,2-difluoro-5-(4-methoxyphenyl)-3-(1-methyl-1H-indol-2-yl)pentanoate (3r)**

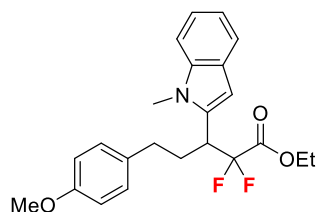

Obtained in 48% yield as a yellow oily liquid liquid (38.5 mg, eluent: PE/EA = 18:1). **<sup>1</sup>H NMR** (400 MHz, CDCl<sub>3</sub>) δ 7.62 (d, *J* = 8.0 Hz, 1H), 7.33 (d, *J* = 8.0 Hz, 1H), 7.24 (t, *J* = 7.4 Hz, 1H), 7.13 (t, *J* = 7.4 Hz, 1H), 6.98 (d, *J* = 8.4 Hz, 2H), 6.82 (d, *J* = 8.4 Hz, 2H), 6.57 (s, 1H), 4.15 (q, *J* = 7.1 Hz, 2H), 3.80 (s, 3H), 3.71 – 3.62 (m, 1H), 3.59 (s, 3H), 2.70 – 2.63 (m, 1H), 2.49 – 2.42 (m, 1H), 2.37 – 2.21 (m, 2H), 1.10 (t, *J* = 7.0 Hz, 3H). **<sup>13</sup>C NMR** (101 MHz, CDCl<sub>3</sub>) δ 163.9 (t, *J* = 32.8 Hz), 158.2, 137.5, 134.1 (d, *J* = 5.7 Hz), 132.6, 129.4, 127.8, 121.7, 120.7, 119.7, 116.0 (t, *J* = 256.9 Hz), 114.0, 109.5, 101.9, 63.0, 55.4, 40.5 (t, *J* = 24.0 Hz), 31.7, 30.3, 29.8, 13.8. **<sup>19</sup>F NMR** (376 MHz, CDCl<sub>3</sub>) δ -106.79 (d, *J* = 252.3 Hz, 1F), -110.49 (dd, *J* = 256.1 Hz, *J* = 15.4 Hz, 1F). **HRMS (ESI)**: calculated for C<sub>23</sub>H<sub>26</sub>O<sub>3</sub>NF<sub>2</sub> ([M+H]<sup>+</sup>): 402.1875; Found: 402.1876.

**ethyl 3-(5-bromo-1-methyl-1H-indol-2-yl)-2,2-difluoro-5-(4-methoxyphenyl)pentanoate (3s)**

### l)pentanoate (3s)

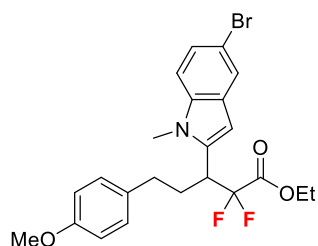

Obtained in 35% yield as a light-yellow oily liquid (33.6 mg, eluent: PE/EA = 18:1), recovery ratio of coumarin: 75% (315.1 mg). **<sup>1</sup>H NMR** (400 MHz, CDCl<sub>3</sub>)  $\delta$  7.72 (d,  $J$  = 1.6 Hz, 1H), 7.72 (dd,  $J$  = 8.4 Hz,  $J$  = 1.6 Hz, 1H), 7.18 (d,  $J$  = 8.8 Hz, 1H), 6.95 (d,  $J$  = 8.4 Hz, 2H), 6.81 (d,  $J$  = 8.8 Hz, 2H), 6.49 (s, 1H), 4.15 (q,  $J$  = 7.1 Hz, 2H), 3.79 (s, 3H), 3.67 – 3.56 (m, 1H), 3.54 (s, 3H), 2.68 – 2.62 (m, 1H), 2.47 – 2.39 (m, 1H), 2.36 – 2.18 (m, 2H), 1.11 (t,  $J$  = 7.0 Hz, 3H). **<sup>13</sup>C NMR** (101 MHz, CDCl<sub>3</sub>)  $\delta$  163.8 (t,  $J$  = 32.7 Hz), 158.2, 136.2, 135.4 (d,  $J$  = 5.8 Hz), 132.3, 129.4, 129.3, 124.6 – 124.5 (m), 123.0 (d,  $J$  = 3.2 Hz), 115.8 (t,  $J$  = 256.9 Hz), 114.0, 113.0, 111.0 – 110.9 (m), 101.4, 63.0, 55.4 (d,  $J$  = 10.0 Hz), 40.7 – 40.3 (m), 31.6, 30.0 (d,  $J$  = 3.0 Hz), 29.9 (d,  $J$  = 4.5 Hz), 13.9. **<sup>19</sup>F NMR** (376 MHz, CDCl<sub>3</sub>)  $\delta$  -107.02 (dd,  $J$  = 256.8 Hz,  $J$  = 11.3 Hz, 1F), -110.25 (dd,  $J$  = 256.8 Hz,  $J$  = 15.0 Hz, 1F). **HRMS (ESI)**: calculated for C<sub>23</sub>H<sub>25</sub>O<sub>3</sub>NBrF<sub>2</sub> ([M+H]<sup>+</sup>): 480.0980; Found: 480.0979.

### ethyl 2,2-difluoro-3-(5-methoxy-1-methyl-1H-indol-2-yl)-5-(4-methoxyphenyl)pentanoate (3t)

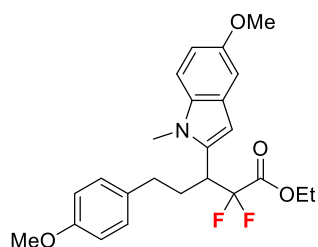

Obtained in 37% yield as a yellow oily liquid (31.9 mg, eluent: PE/EA = 18:1), recovery ratio of coumarin: 77% (198.6 mg). **<sup>1</sup>H NMR** (400 MHz, CDCl<sub>3</sub>)  $\delta$  7.26 – 7.22 (m, 1H), 7.10 (d,  $J$  = 2.0 Hz, 1H), 6.99 (d,  $J$  = 8.0 Hz, 2H), 6.92 (dd,  $J$  = 8.8 Hz,  $J$  = 2.4 Hz, 1H), 6.84 (d,  $J$  = 8.8 Hz, 2H), 6.51 (s, 1H), 4.16 (q,  $J$  = 6.9 Hz, 2H), 3.88 (s, 3H), 3.81 (s, 3H), 3.74 – 3.61 (m, 1H), 3.56 (s, 3H), 2.71 – 2.65 (m, 1H), 2.50 – 2.43 (m, 1H), 2.37 – 2.22 (m, 2H), 1.11 (t,  $J$  = 7.0 Hz, 3H). **<sup>13</sup>C NMR** (101 MHz, CDCl<sub>3</sub>)  $\delta$  163.9 (t,  $J$  = 32.8 Hz), 158.1, 154.2, 134.4 (d,  $J$  = 5.8 Hz), 132.9, 132.1, 129.4, 128.0, 115.9 (t,  $J$  = 256.6 Hz), 114.0, 112.0, 110.2, 102.1, 101.4, 62.9, 55.9 (d,  $J$  = 4.8 Hz), 55.3 (d,  $J$  = 4.8 Hz), 40.5 (t,  $J$  = 22.7 Hz), 31.7, 30.2, 29.9, 13.8. **<sup>19</sup>F NMR**

(376 MHz, CDCl<sub>3</sub>)  $\delta$  -106.60 (dd,  $J$  = 254.9 Hz,  $J$  = 13.9 Hz, 1F), -111.39 (dd,  $J$  = 254.5 Hz,  $J$  = 16.5 Hz, 1F). **HRMS (ESI)**: calculated for C<sub>24</sub>H<sub>28</sub>O<sub>4</sub>NF<sub>2</sub> ([M+H]<sup>+</sup>): 432.1981; Found: 432.1983.

**ethyl 5-(3,4-dimethoxyphenyl)-2,2-difluoro-3-(2-oxo-2H-chromen-3-yl)pentanoate (4a)**

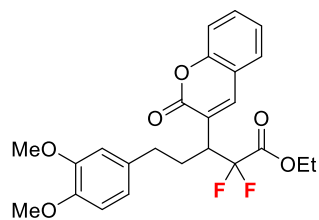

Obtained in 78% yield as a white solid (69.6 mg, eluent: PE/EA = 8:1), mp: 83 – 85°C, recovery ratio of coumarin: 81% (189.4 mg). **<sup>1</sup>H NMR** (400 MHz, CDCl<sub>3</sub>)  $\delta$  7.72 (s, 1H), 7.53 (t,  $J$  = 8.6 Hz, 1H), 7.47 (d,  $J$  = 7.6 Hz, 1H), 7.33 – 7.26 (m, 2H), 6.70 (d,  $J$  = 8.4 Hz, 1H), 6.64 (d,  $J$  = 6.8 Hz, 2H), 4.22 (q,  $J$  = 7.2 Hz, 2H), 4.02 – 3.91 (m, 1H), 3.84 (s, 3H), 3.77 (s, 3H), 2.59 (t,  $J$  = 7.6 Hz, 2H), 2.32 – 2.24 (m, 1H), 2.17 – 2.08 (m, 1H), 1.23 (t,  $J$  = 7.2 Hz, 3H). **<sup>13</sup>C NMR** (101 MHz, CDCl<sub>3</sub>)  $\delta$  163.4 (t,  $J$  = 32.9 Hz), 161.5, 153.2, 148.8, 147.4, 141.9, 133.2, 132.1, 128.1, 124.7, 123.6 (d,  $J$  = 5.5 Hz), 120.2, 118.9, 116.6, 115.7 (t,  $J$  = 256.1 Hz), 111.6, 111.2, 77.4, 63.2, 55.9, 41.9 (t,  $J$  = 23.0 Hz), 32.6, 29.8, 13.8. **<sup>19</sup>F NMR** (376 MHz, CDCl<sub>3</sub>)  $\delta$  -108.17 (dm,  $J$  = 253.4 Hz, 1F), -111.33 (dt,  $J$  = 253.4 Hz,  $J$  = 10.5 Hz, 1F). **HRMS (ESI)**: calculated for C<sub>24</sub>H<sub>25</sub>O<sub>6</sub>F<sub>2</sub> ([M+H]<sup>+</sup>): 447.1614; Found: 447.1613.

**ethyl 5-(benzo[d][1,3]dioxol-5-yl)-2,2-difluoro-3-(2-oxo-2H-chromen-3-yl)pentanoate (4b)**

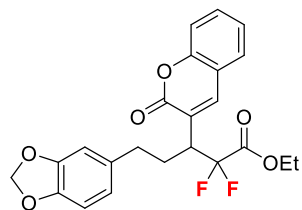

Obtained in 72% yield as a white solid (62.0 mg, eluent: PE/EA = 11:1), mp: 73 – 75°C, recovery ratio of coumarin: 77% (180.0 mg). **<sup>1</sup>H NMR** (400 MHz, CDCl<sub>3</sub>)  $\delta$  7.72 (s, 1H), 7.57 – 7.53 (m, 1H), 7.50 (dd,  $J$  = 7.6 Hz,  $J$  = 1.6 Hz, 1H), 7.34 – 7.28 (m, 2H), 6.66 (d,  $J$  = 8.0 Hz, 1H), 6.60 (d,  $J$  = 1.6 Hz, 1H), 6.55 (dd,  $J$  = 8.0 Hz,  $J$  = 1.6 Hz, 1H), 5.84 (dd,  $J$  = 7.2 Hz,  $J$  = 1.6 Hz, 2H), 4.25 (q,  $J$  = 7.1 Hz, 2H), 4.01 – 3.89 (m, 1H), 2.62 – 2.51 (m, 2H), 2.31 –

2.23 (m, 1H), 2.13 – 2.03 (m, 1H), 1.26 (t,  $J = 7.2$  Hz, 3H).  $^{13}\text{C}$  NMR (101 MHz,  $\text{CDCl}_3$ )  $\delta$  163.4 (t,  $J = 32.8$  Hz), 161.5, 153.3, 147.8, 146.0, 141.9, 134.5, 132.1, 128.2, 124.7, 123.6 (d,  $J = 5.1$  Hz), 121.3, 118.9, 116.7, 115.7 (t,  $J = 255.8$  Hz), 108.7, 108.4, 100.9, 63.3, 42.0 (t,  $J = 22.9$  Hz), 32.9, 29.9, 13.9.  $^{19}\text{F}$  NMR (376 MHz,  $\text{CDCl}_3$ )  $\delta$  -108.72 (dd,  $J = 253.8$  Hz,  $J = 13.2$  Hz, 1F), -111.99 (dd,  $J = 253.4$  Hz,  $J = 18.8$  Hz, 1F). **HRMS (ESI)**: calculated for  $\text{C}_{23}\text{H}_{21}\text{O}_6\text{F}_2$  ( $[\text{M}+\text{H}]^+$ ): 431.1301; Found: 431.1298.

**ethyl 2,2-difluoro-3-(2-oxo-2H-chromen-3-yl)-5-(4-(trifluoromethoxy)phenyl)pentanoate (4c)**

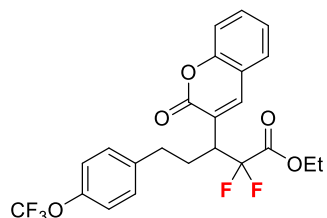

Obtained in 72% yield as a white solid (67.7 mg, eluent: PE/EA = 15:1), mp: 62 – 64°C, recovery ratio of coumarin: 78% (182.4 mg).  $^1\text{H}$  NMR (400 MHz,  $\text{CDCl}_3$ )  $\delta$  7.77 (s, 1H), 7.57 – 7.53 (m, 1H), 7.50 (dd,  $J = 7.6$  Hz,  $J = 1.6$  Hz, 1H), 7.35 – 7.29 (m, 2H), 7.15 (d,  $J = 8.4$  Hz, 2H), 7.08 (d,  $J = 8.4$  Hz, 2H), 4.24 (q,  $J = 7.1$  Hz, 2H), 4.04 – 3.92 (m, 1H), 2.65 (t,  $J = 7.8$  Hz, 2H), 2.35 – 2.27 (m, 1H), 2.17 – 2.07 (m, 1H), 1.24 (t,  $J = 7.2$  Hz, 3H).  $^{13}\text{C}$  NMR (101 MHz,  $\text{CDCl}_3$ )  $\delta$  163.3 (t,  $J = 32.7$  Hz), 161.5, 153.3, 147.7 (q,  $J = 1.9$  Hz), 142.0, 139.5, 132.3, 129.7, 128.3, 124.8, 123.6 (d,  $J = 5.5$  Hz), 121.2, 120.5 (q,  $J = 260.9$  Hz), 118.9, 116.7, 115.7 (t,  $J = 256.3$  Hz), 63.4, 42.1 (t,  $J = 23.0$  Hz), 32.4, 29.8 (t,  $J = 2.9$  Hz), 13.9.  $^{19}\text{F}$  NMR (376 MHz,  $\text{CDCl}_3$ )  $\delta$  -58.02 (d,  $J = 7.4$  Hz, 3F), -107.76 (dm,  $J = 254.9$  Hz, 1F), -111.45 (dm,  $J = 254.9$  Hz, 1F). **HRMS (ESI)**: calculated for  $\text{C}_{23}\text{H}_{20}\text{O}_5\text{F}_5$  ( $[\text{M}+\text{H}]^+$ ): 471.1225; Found: 471.1224.

**ethyl 2,2-difluoro-3-(2-oxo-2H-chromen-3-yl)-5-phenylpentanoate (4d)**

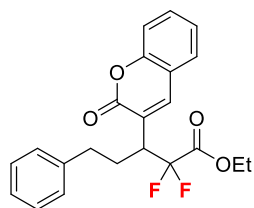

Obtained in 74% yield as a white solid (57.2 mg, eluent: PE/EA = 15:1), mp: 100 – 102°C, recovery ratio of coumarin: 76% (177.7 mg).  $^1\text{H}$  NMR (400 MHz,  $\text{CDCl}_3$ )  $\delta$  7.76 (s, 1H), 7.54 (t,  $J = 8.6$  Hz, 1H), 7.50 (d,  $J = 8.0$  Hz, 1H), 7.34 – 7.22

(m, 4H), 7.16 – 7.12 (m, 3H), 4.24 (q,  $J = 7.2$  Hz, 2H), 4.05 – 3.93 (m, 1H), 2.64 (t,  $J = 8.0$  Hz, 2H), 2.36 – 2.27 (m, 1H), 2.19 – 2.09 (m, 1H), 1.25 (t,  $J = 7.0$  Hz, 3H).  $^{13}\text{C NMR}$  (101 MHz,  $\text{CDCl}_3$ )  $\delta$  163.4 (t,  $J = 32.9$  Hz), 161.5, 153.3, 141.9, 140.8, 132.1, 128.6, 128.4, 128.2, 126.3, 124.7, 123.7 (d,  $J = 5.7$  Hz), 119.0, 116.7, 115.8 (t,  $J = 256.2$  Hz), 63.3, 42.2 (t,  $J = 22.9$  Hz), 33.1, 29.7, 13.9.  $^{19}\text{F NMR}$  (376 MHz,  $\text{CDCl}_3$ )  $\delta$  -108.15 (dd,  $J = 254.2$  Hz,  $J = 13.2$  Hz, 1F), -111.18 (dd,  $J = 254.2$  Hz,  $J = 18.4$  Hz, 1F). **HRMS (ESI):** calculated for  $\text{C}_{22}\text{H}_{21}\text{O}_4\text{F}_2$  ( $[\text{M}+\text{H}]^+$ ): 387.1402; Found: 387.1403.

**ethyl 2,2-difluoro-3-(2-oxo-2H-chromen-3-yl)-5-(*p*-tolyl)pentanoate (4e)**

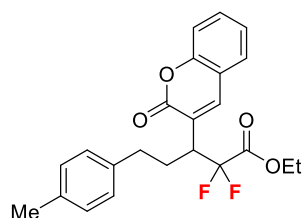

Obtained in 73% yield as a white solid (58.5 mg, eluent: PE/EA = 14:1), mp: 70 – 72°C, recovery ratio of coumarin: 78% (182.4 mg).  $^1\text{H NMR}$  (400 MHz,  $\text{CDCl}_3$ )  $\delta$  7.74 (s, 1H), 7.54 (t,  $J = 8.6$  Hz, 1H), 7.49 (dd,  $J = 7.6$  Hz,  $J = 1.6$  Hz, 1H), 7.34 – 7.26 (m, 2H), 7.03 (q,  $J = 7.1$  Hz, 4H), 4.25 (q,  $J = 7.2$  Hz, 2H), 4.04 – 3.92 (m, 1H), 2.62 (t,  $J = 8.6$  Hz, 2H), 2.36 – 2.26 (m, 1H), 2.24 (s, 3H), 2.18 – 2.09 (m, 1H), 1.26 (t,  $J = 7.2$  Hz, 3H).  $^{13}\text{C NMR}$  (101 MHz,  $\text{CDCl}_3$ )  $\delta$  163.4 (t,  $J = 32.8$  Hz), 161.5, 153.3, 141.9, 137.7, 135.9, 132.0, 129.3, 128.2, 128.2, 124.7, 123.7 (d,  $J = 5.6$  Hz), 119.0, 116.6, 115.8 (t,  $J = 256.1$  Hz), 63.3, 42.2 (t,  $J = 22.8$  Hz), 32.7, 29.7, 21.0, 13.9.  $^{19}\text{F NMR}$  (376 MHz,  $\text{CDCl}_3$ )  $\delta$  -108.15 (dd,  $J = 254.2$  Hz,  $J = 13.2$  Hz, 1F), -111.18 (dd,  $J = 254.2$  Hz,  $J = 18.4$  Hz, 1F). **HRMS (ESI):** calculated for  $\text{C}_{23}\text{H}_{23}\text{O}_4\text{F}_2$  ( $[\text{M}+\text{H}]^+$ ): 401.1559; Found: 401.1558.

**ethyl 5-(4-(*tert*-butyl)phenyl)-2,2-difluoro-3-(2-oxo-2H-chromen-3-yl)pentanoate (4f)**

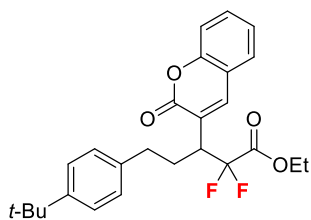

Obtained in 67% yield as a colorless liquid (59.3 mg, eluent: PE/EA = 14:1), recovery ratio of coumarin: 83% (194.0 mg). **<sup>1</sup>H NMR** (400 MHz, CDCl<sub>3</sub>) δ 7.74 (s, 1H), 7.56 – 7.52 (m, 1H), 7.49 (dd, *J* = 9.2 Hz, *J* = 1.6 Hz, 1H), 7.34 – 7.25 (m, 4H), 7.07 (d, *J* = 8.0 Hz, 2H), 4.25 (q, *J* = 7.2 Hz, 2H), 4.07 – 3.96 (m, 1H), 2.71 – 2.57 (m, 2H), 2.37 – 2.29 (m, 1H), 2.19 – 2.09 (m, 1H), 1.28 – 1.25 (m, 12H). **<sup>13</sup>C NMR** (101 MHz, CDCl<sub>3</sub>) δ 163.4 (t, *J* = 32.9 Hz), 161.5, 153.3, 149.1, 141.8, 137.7, 132.0, 128.2, 128.0, 125.5, 124.7, 123.7 (d, *J* = 5.2 Hz), 118.9, 116.6, 115.8 (t, *J* = 256.2 Hz), 63.3, 42.2 (t, *J* = 22.9 Hz), 34.4, 32.6, 31.4, 29.6 (t, *J* = 3.1 Hz), 13.9. **<sup>19</sup>F NMR** (376 MHz, CDCl<sub>3</sub>) δ -108.42 (dm, *J* = 254.2 Hz, 1F), -111.16 (dm, *J* = 253.4 Hz, 1F). **HRMS (ESI)**: calculated for C<sub>26</sub>H<sub>29</sub>O<sub>4</sub>F<sub>2</sub> ([M+H]<sup>+</sup>): 443.2028; Found: 443.2027.

**ethyl 2,2-difluoro-3-(2-oxo-2H-chromen-3-yl)-5-(4-(trifluoromethyl)phenyl)pentanoate (4g)**

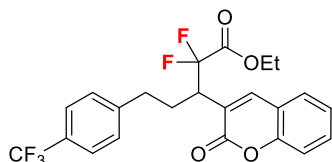

Obtained in 75% yield as a colorless liquid (68.2 mg, eluent: PE/EA = 10:1), mp: 64 – 66°C, recovery ratio of coumarin: 77% (180.0 mg). **<sup>1</sup>H NMR** (400 MHz, CDCl<sub>3</sub>) δ 7.76 (s, 1H), 7.58 – 7.53 (m, 1H), 7.50 – 7.47 (m, 3H), 7.34 – 7.29 (m, 2H), 7.25 (d, *J* = 8.4 Hz, 2H), 4.24 (q, *J* = 7.2 Hz, 2H), 4.04 – 3.93 (m, 1H), 2.74 – 2.69 (m, 2H), 2.38 – 2.30 (m, 1H), 2.20 – 2.10 (m, 1H), 1.24 (t, *J* = 7.2 Hz, 3H). **<sup>13</sup>C NMR** (101 MHz, CDCl<sub>3</sub>) δ 163.3 (t, *J* = 32.8 Hz), 161.5, 153.3, 144.9, 142.0, 132.3, 128.8, 128.7 (q, *J* = 32.6 Hz), 128.2, 125.5 (q, *J* = 3.8 Hz), 124.8, 124.3 (q, *J* = 260.5 Hz), 123.5 (d, *J* = 5.8 Hz), 118.8, 116.7, 115.7 (t, *J* = 256.4 Hz), 63.4, 42.1 (t, *J* = 23.0 Hz), 33.0, 29.6, 13.9. **<sup>19</sup>F NMR** (376 MHz, CDCl<sub>3</sub>) δ – 63.04 (s, 3F), -108.13 (dd, *J* = 254.9 Hz, *J* = 13.2 Hz, 1F), -112.13 (dd, *J* = 255.3 Hz, *J* = 18.8 Hz, 1F). **HRMS (ESI)**: calculated for C<sub>23</sub>H<sub>20</sub>O<sub>4</sub>F<sub>5</sub> ([M+H]<sup>+</sup>): 455.1276; Found: 455.1272.



**ethyl 2,2-difluoro-3-(2-oxo-2H-chromen-3-yl)-5,5-diphenylpentanoate (4h)**

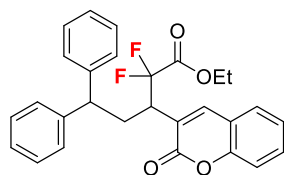

Obtained in 80% yield as a colorless liquid (74.0 mg, eluent: PE/EA = 10:1), recovery ratio of coumarin: 85% (198.7 mg). **<sup>1</sup>H NMR** (400 MHz, CDCl<sub>3</sub>) δ 7.65 (s, 1H), 7.56 – 7.52 (m, 1H), 7.44 (dd, *J* = 7.6 Hz, *J* = 1.6 Hz, 1H), 7.33 – 7.28 (m, 4H), 7.24 – 7.18 (m, 7H), 7.08 – 7.03 (m, 1H), 4.21 (qd, *J* = 7.2 Hz, *J* = 2.0 Hz, 2H), 3.89 – 3.78 (m, 2H), 2.82 – 2.75 (m, 1H), 2.69 – 2.61 (m, 1H), 1.21 (t, *J* = 7.0 Hz, 3H). **<sup>13</sup>C NMR** (101 MHz, CDCl<sub>3</sub>) δ 163.3 (t, *J* = 32.8 Hz), 161.1, 153.4, 144.1, 142.9, 142.4 (d, *J* = 2.9 Hz), 132.1, 128.8 (d, *J* = 2.7 Hz), 128.6 (d, *J* = 1.7 Hz), 128.2 (m), 128.0, 127.6, 126.9, 126.5, 124.6 (d, *J* = 1.8 Hz), 123.2 (d, *J* = 4.3 Hz), 118.9, 116.6, 115.8 (t, *J* = 256.2 Hz), 63.3, 48.6 (m), 41.8 (t, *J* = 23.4 Hz), 33.6, 13.8 (d, *J* = 1.7 Hz). **<sup>19</sup>F NMR** (376 MHz, CDCl<sub>3</sub>) δ -108.01 (d, *J* = 253.0 Hz, 1F), -109.67 (d, *J* = 252.3 Hz, 1F). **HRMS (ESI)**: calculated for C<sub>28</sub>H<sub>25</sub>O<sub>4</sub>F<sub>2</sub> ([M+H]<sup>+</sup>): 463.1715; Found: 463.1711.

**ethyl 4-((3*r*,5*r*,7*r*)-adamantan-1-yl)-2,2-difluoro-3-(2-oxo-2H-chromen-3-yl)butanoate (4i)**

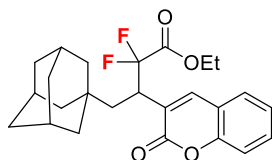

Obtained in 60% yield as a white solid (51.6 mg, eluent: PE/EA = 10:1), mp: 122 – 124°C, recovery ratio of coumarin: 68% (159.0 mg). **<sup>1</sup>H NMR** (400 MHz, CDCl<sub>3</sub>) δ 7.77 (s, 1H), 7.55 – 7.51 (m, 2H), 7.34 – 7.27 (m, 2H), 4.28 (q, *J* = 7.2 Hz, 2H), 4.14 – 4.03 (m, 1H), 1.89 (s, 3H), 1.72 (d, *J* = 14.4 Hz, 1H), 1.66 – 1.54 (m, 7H), 1.48 (d, *J* = 11.6 Hz, 3H), 1.35 – 1.29 (m, 6H). **<sup>13</sup>C NMR** (101 MHz, CDCl<sub>3</sub>) δ 163.6 (t, *J* = 33.1 Hz), 161.5, 153.3, 141.8, 131.9, 128.2, 126.1, 124.6, 119.1, 116.7, 116.3 (t, *J* = 256.0 Hz), 63.3, 43.1, 42.6, 36.8, 36.7 (t, *J* = 24.0 Hz), 32.8, 28.5, 14.0. **<sup>19</sup>F NMR** (376 MHz, CDCl<sub>3</sub>) δ -110.12 (m, 2F). **HRMS (ESI)**: calculated for C<sub>25</sub>H<sub>29</sub>O<sub>4</sub>F<sub>2</sub> ([M+H]<sup>+</sup>): 431.2028; Found: 431.2025.

**ethyl 4-cyclohexyl-2,2-difluoro-3-(2-oxo-2H-chromen-3-yl)butanoate (4j)**

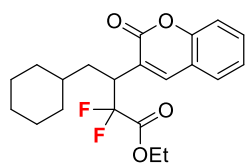

Obtained in 77% yield as a white solid (58.3 mg, eluent: PE/EA = 8:1), mp: 102 – 104°C, recovery ratio of coumarin: 80% (187.0 mg). **<sup>1</sup>H NMR** (400 MHz, CDCl<sub>3</sub>) δ 7.73 (s, 1H),

7.55 – 7.50 (m, 2H), 7.32 – 7.26 (m, 2H), 4.33 – 4.21 (m, 2H), 4.13 – 4.01 (m, 1H), 1.84 (d, *J* = 12.4 Hz, 1H), 1.79 – 1.57 (m, 6H), 1.28 (t, *J* = 7.2 Hz, 3H), 1.20 – 1.05 (m, 4H), 1.00 – 0.90 (m, 1H), 0.88 – 0.78 (m, 1H). **<sup>13</sup>C NMR** (101 MHz, CDCl<sub>3</sub>) δ 163.6 (t, *J* = 33.0 Hz), 161.5, 153.2, 141.8, 131.9 (d, *J* = 2.7 Hz), 128.2, 124.7 – 124.6 (m), 124.1 (d, *J* = 4.9 Hz), 119.0, 116.7 – 116.5 (m), 116.0 (t, *J* = 256.0 Hz), 63.2, 39.6 – 39.0 (m), 35.4, 34.5, 34.3, 32.0, 26.4, 26.2, 25.9, 13.9 (d, *J* = 3.4 Hz). **<sup>19</sup>F NMR** (376 MHz, CDCl<sub>3</sub>) δ -109.71 (dd, *J* = 253.0 Hz, *J* = 14.7 Hz, 1F), -111.02 (dd, *J* = 252.7 Hz, *J* = 17.7 Hz, 1F). **HRMS (ESI)**: calculated for C<sub>21</sub>H<sub>24</sub>O<sub>4</sub>F<sub>2</sub> ([M]<sup>+</sup>): 378.1637; Found: 378.1633.

**ethyl 2,2-difluoro-3-(2-oxo-2H-chromen-3-yl)-4-(tetrahydro-2H-pyran-4-yl)butanoate (4k)**

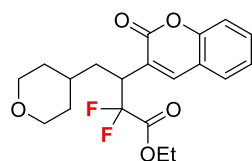

Obtained in 82% yield as a white solid (62.4 mg, eluent: PE/EA = 8:1), mp: 113 – 115°C, recovery ratio of coumarin: 87% (203.4 mg). **<sup>1</sup>H NMR** (400 MHz, CDCl<sub>3</sub>) δ 7.76 (s, 1H),

7.57 – 7.51 (m, 2H), 7.34 – 7.29 (m, 2H), 4.31 – 4.23 (m, 2H), 4.14 – 4.02 (m, 1H), 3.94 – 3.86 (m, 2H), 3.26 (m, 2H), 1.84 – 1.76 (m, 3H), 1.51 – 1.17 (m, 7H). **<sup>13</sup>C NMR** (101 MHz, CDCl<sub>3</sub>) δ 163.4 (t, *J* = 32.9 Hz), 161.5, 153.2, 142.0, 132.2, 128.3, 124.8, 123.9 (d, *J* = 5.6 Hz), 118.9, 116.7, 115.9 (t, *J* = 256.1 Hz), 67.7 (d, *J* = 2.9 Hz), 63.3, 38.8 (t, *J* = 22.6 Hz), 35.3, 33.8, 32.0 (d, *J* = 6.6 Hz), 14.0. **<sup>19</sup>F NMR** (376 MHz, CDCl<sub>3</sub>) δ -108.82 (dd, *J* = 254.2 Hz, *J* = 13.5 Hz, 1F), -111.59 (dd, *J* = 254.2 Hz, *J* = 18.0 Hz, 1F). **HRMS (ESI)**: calculated for C<sub>20</sub>H<sub>23</sub>O<sub>5</sub>F<sub>2</sub> ([M+H]<sup>+</sup>): 381.1508; Found: 381.1504.

## 8. Reference

- [1] D. Chen, L. Xu, Y. Yu, Q. Mo, X. Qi and C. Liu, Triflylpyridinium Enables Rapid and Scalable Controlled Reduction of Carboxylic Acids to Aldehydes using Pinacolborane, *Angew. Chem. Int. Ed. Engl.*, 2023, **62**, e202215168.
- [2] F. Friese, C. Mück-Lichtenfeld and A. Studer, Remote C-H functionalization using radical translocating arylating groups, *Nat. Commun.*, 2018, **9**, 2808.
- [3] X. Lin, F. Zheng and F.-J. Qing, Iron-Catalyzed Cross-Coupling Reactions between Arylzinc Reagents and Alkyl Halides Bearing  $\beta$ -Fluorines, *Organometallics*, 2012, **31**, 1578–1582.
- [4] X. Li, Z. Feng, Z.-X. Jiang and X. Zhang, Nickel-catalyzed reductive cross-coupling of (hetero)aryl iodides with fluorinated secondary alkyl bromides, *Org. Lett.*, 2015, **17**, 5570.

## 9. Copies of $^1\text{H}$ NMR, $^{19}\text{F}$ NMR and $^{13}\text{C}$ NMR charts of the Products

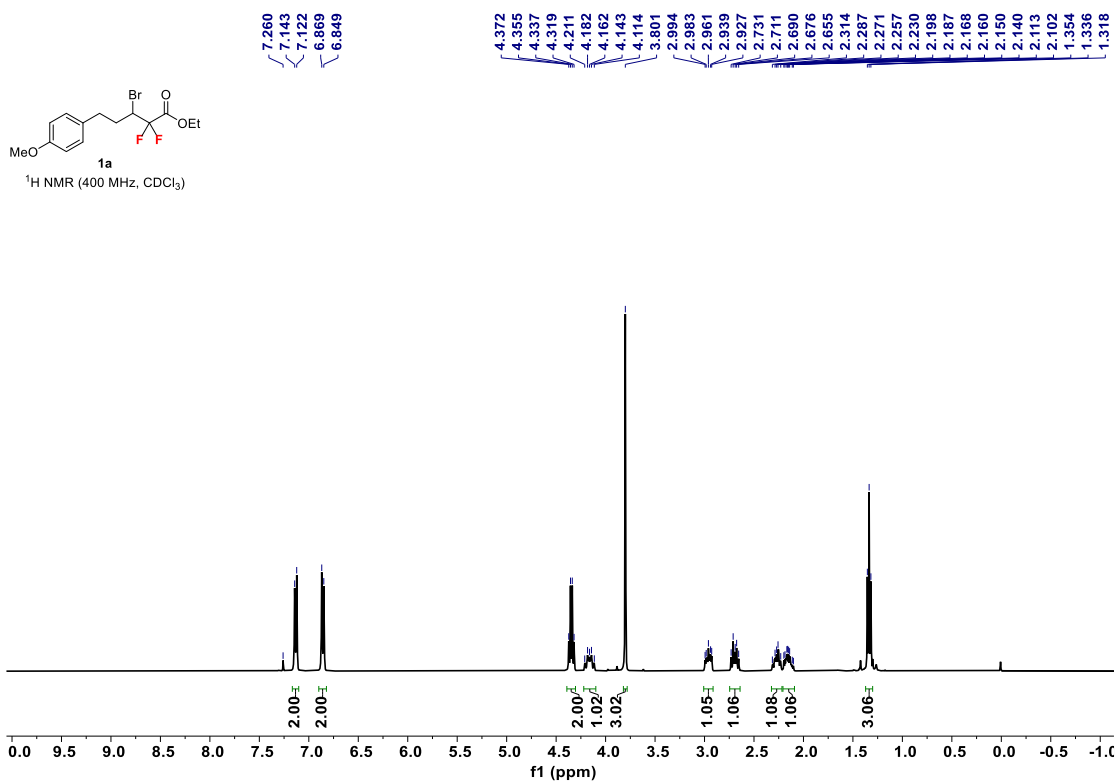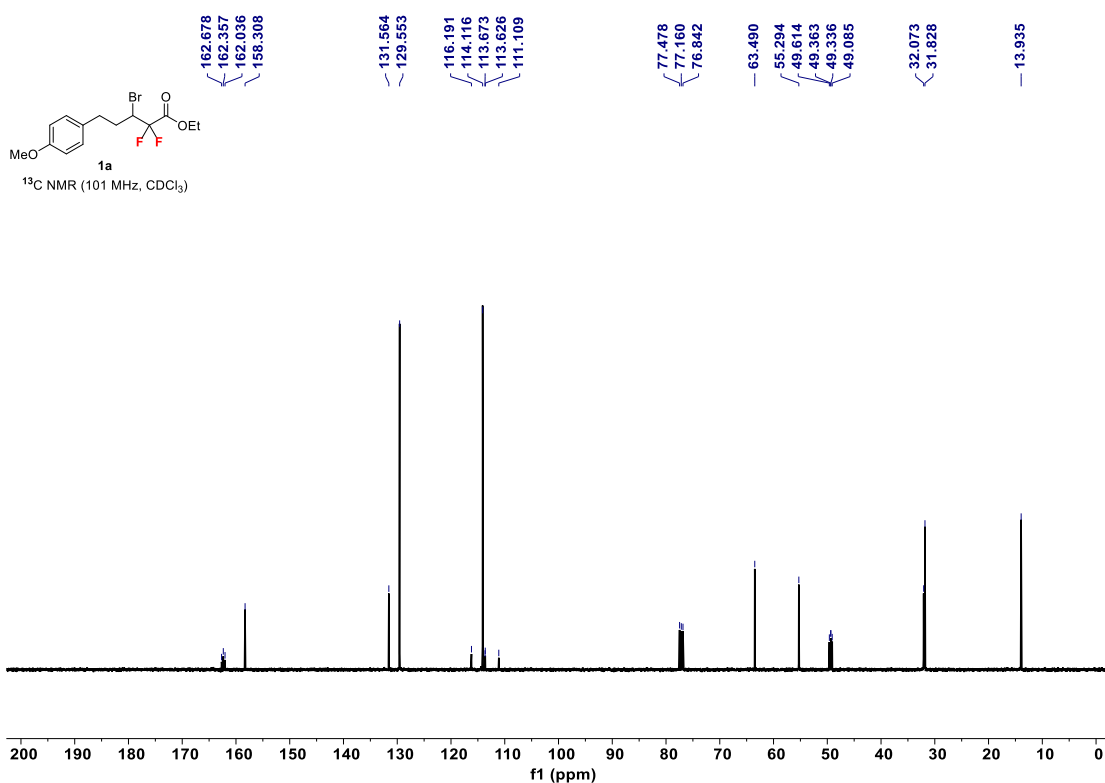

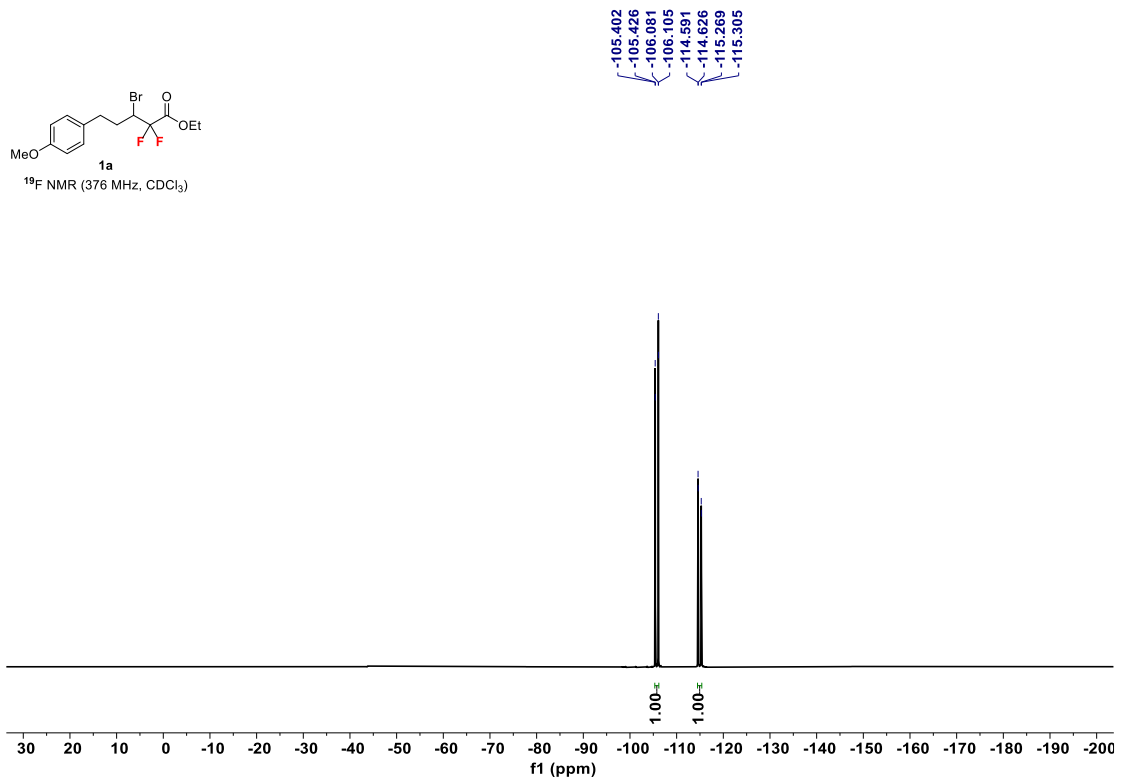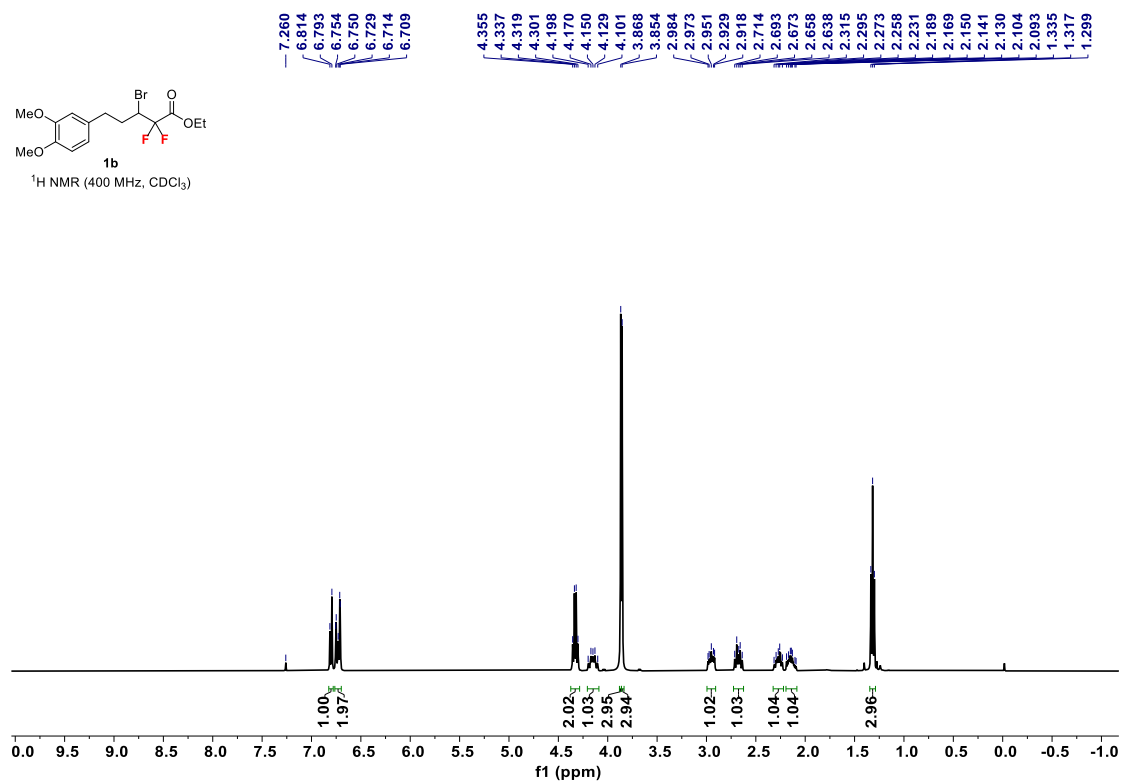

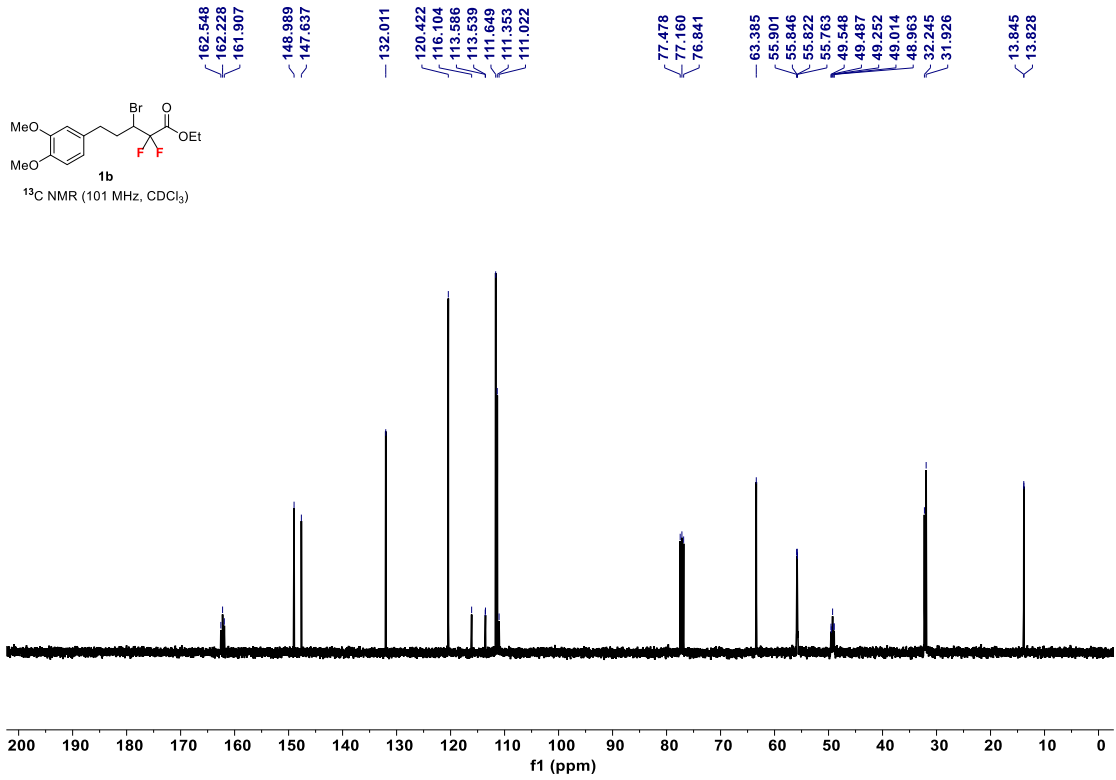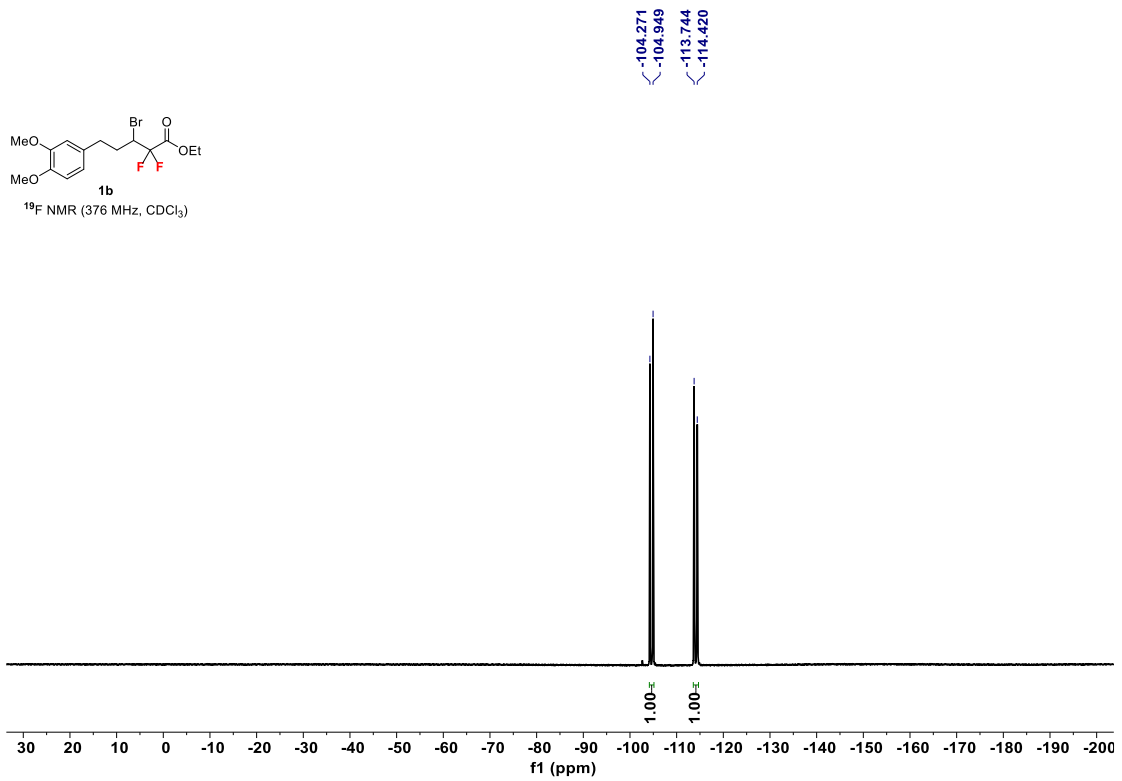

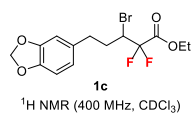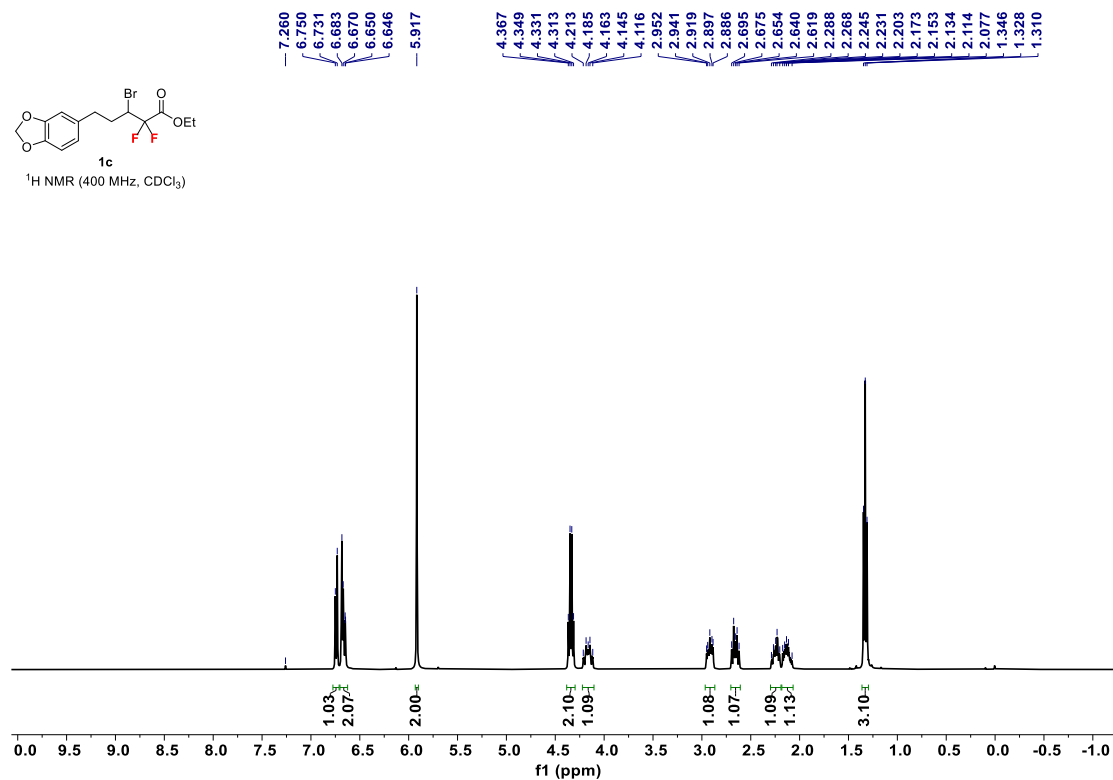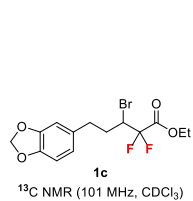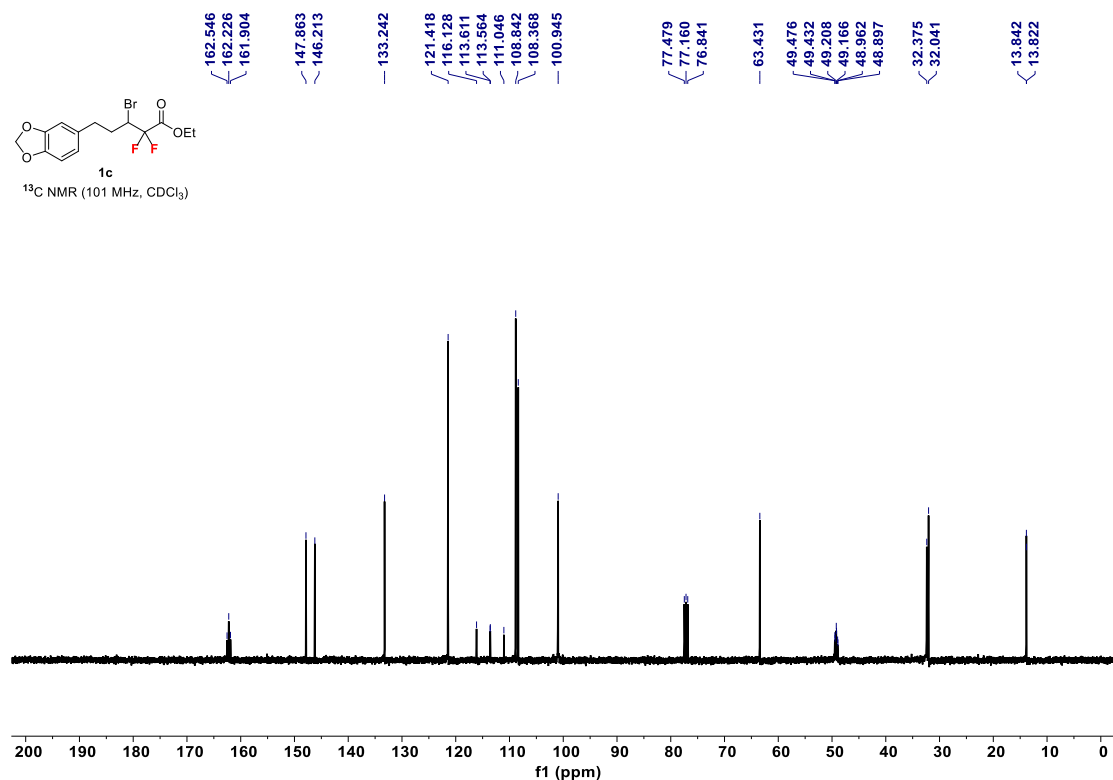

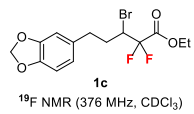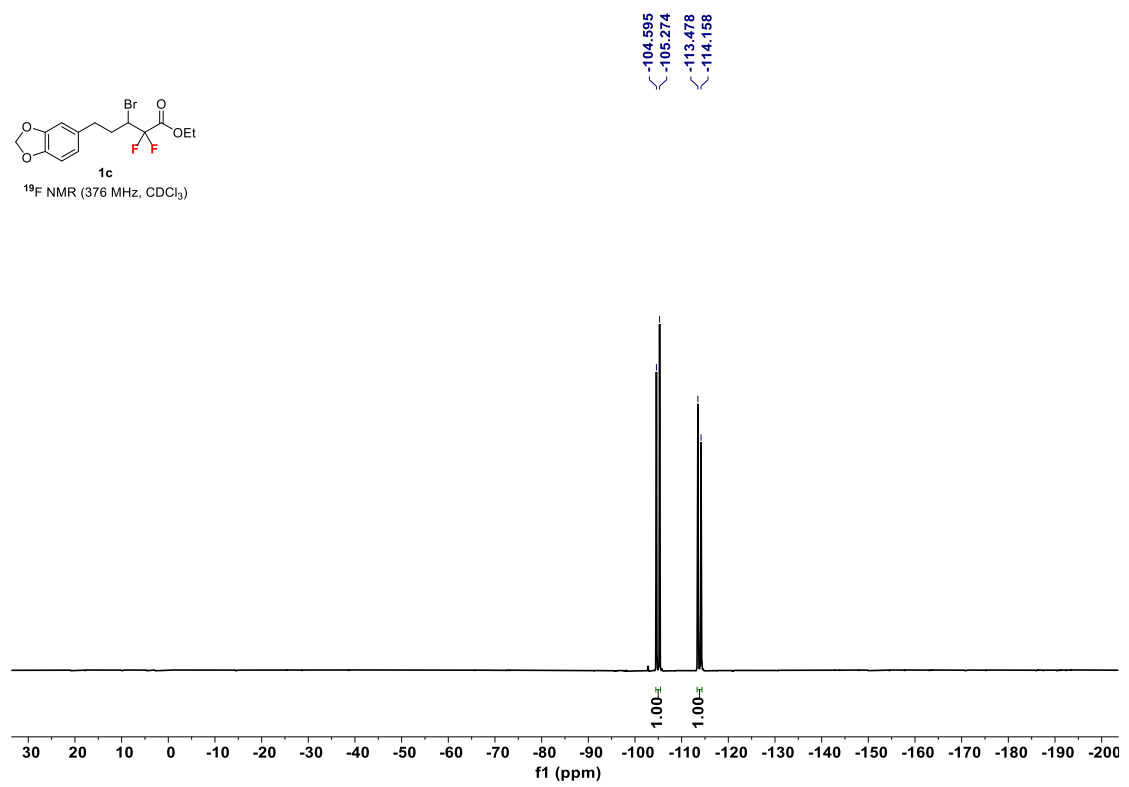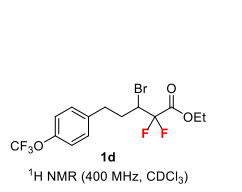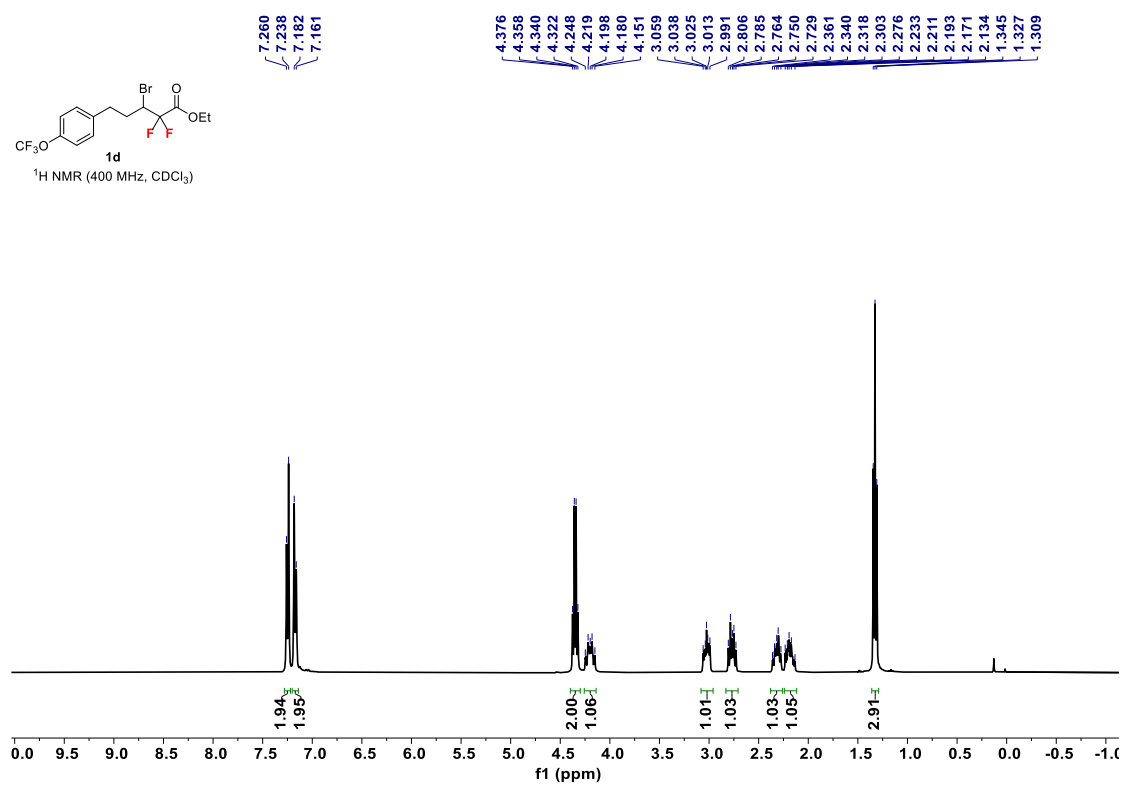



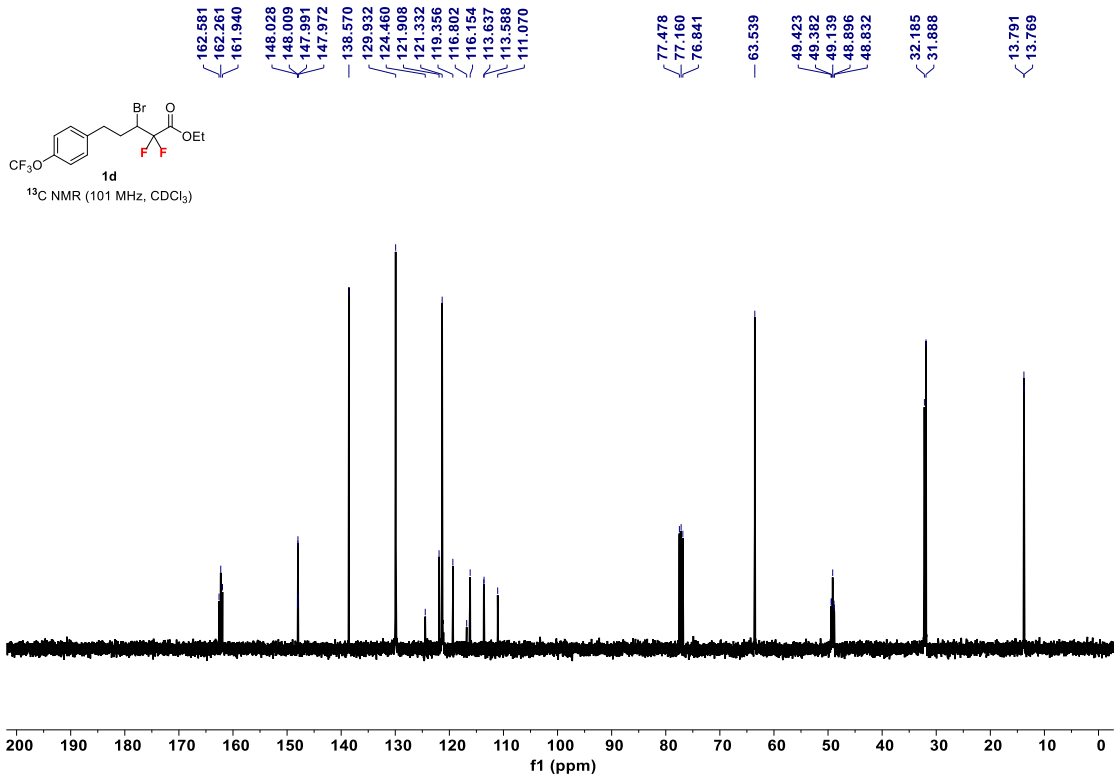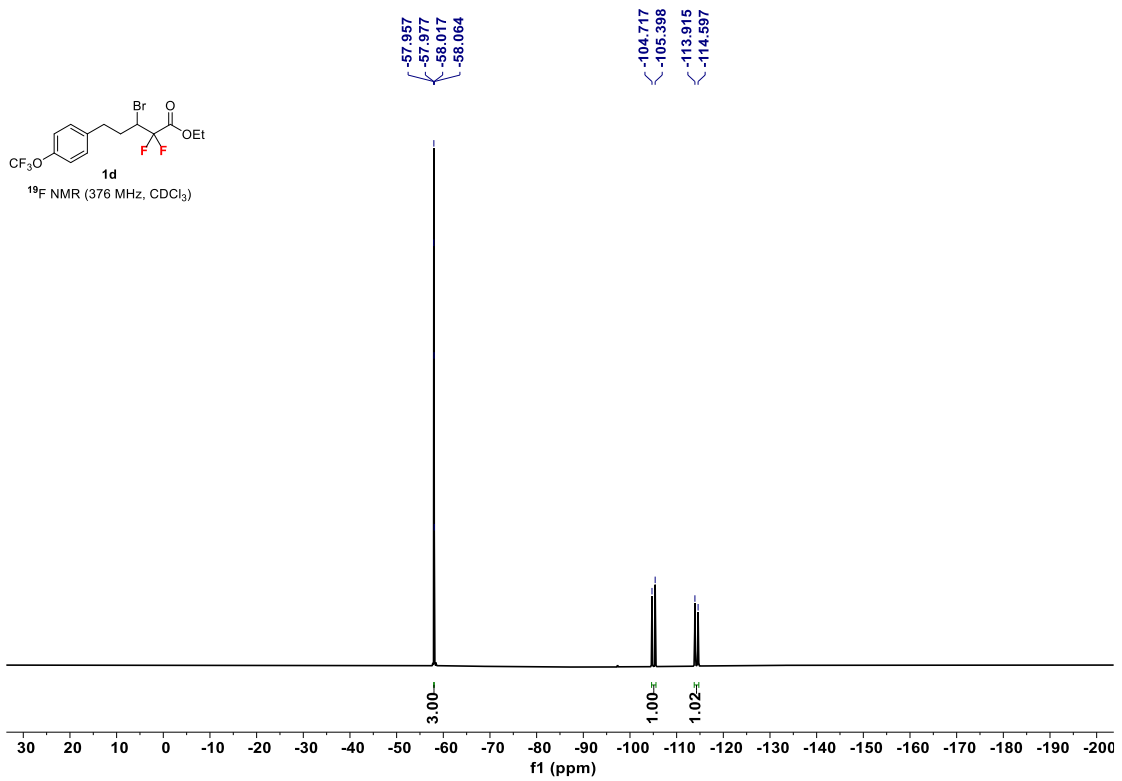

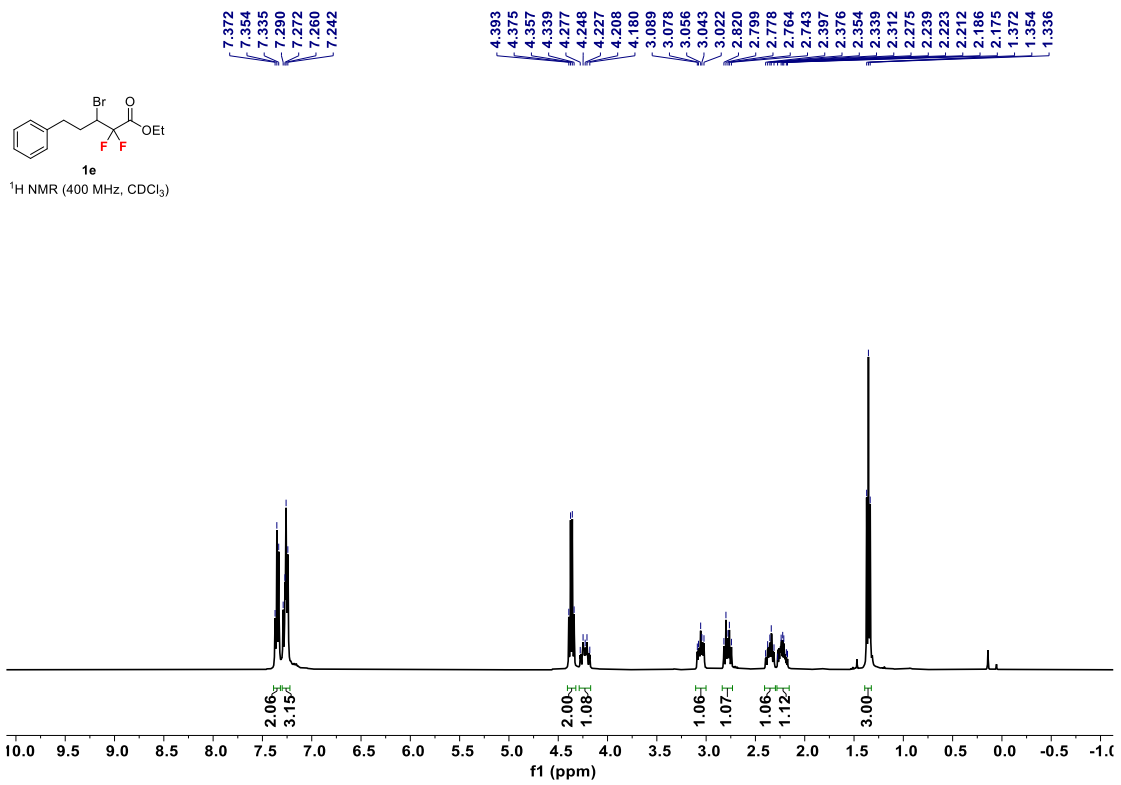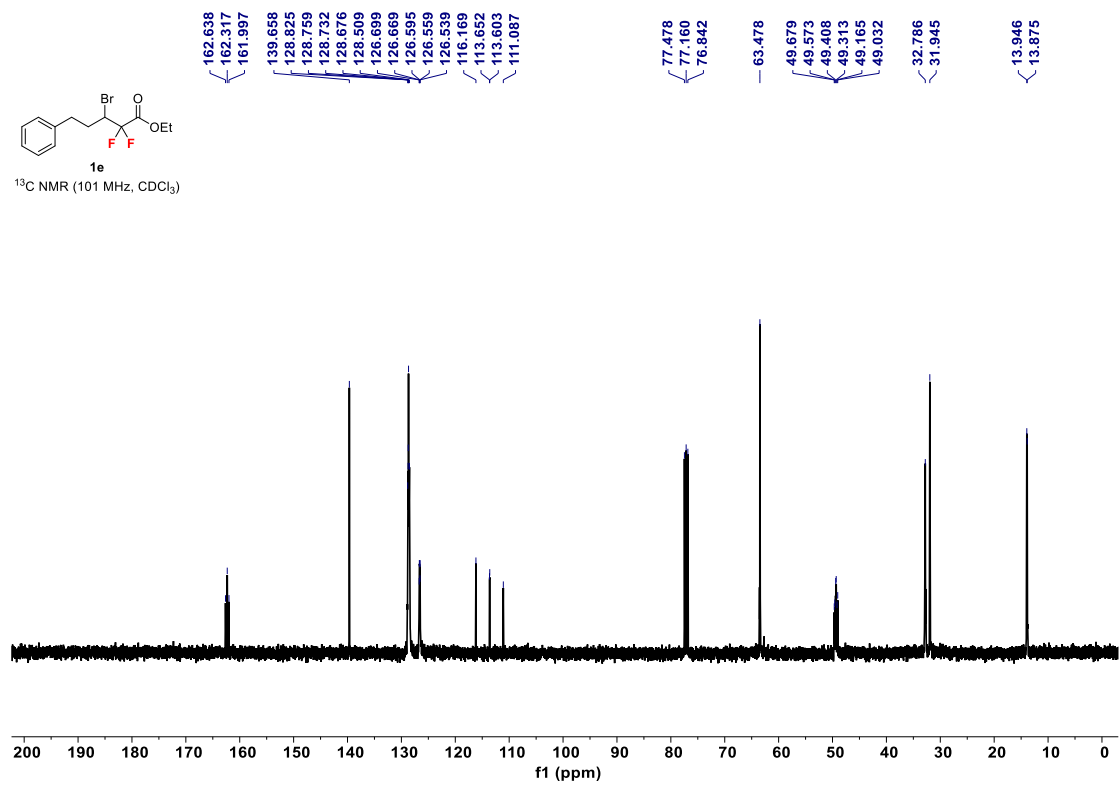

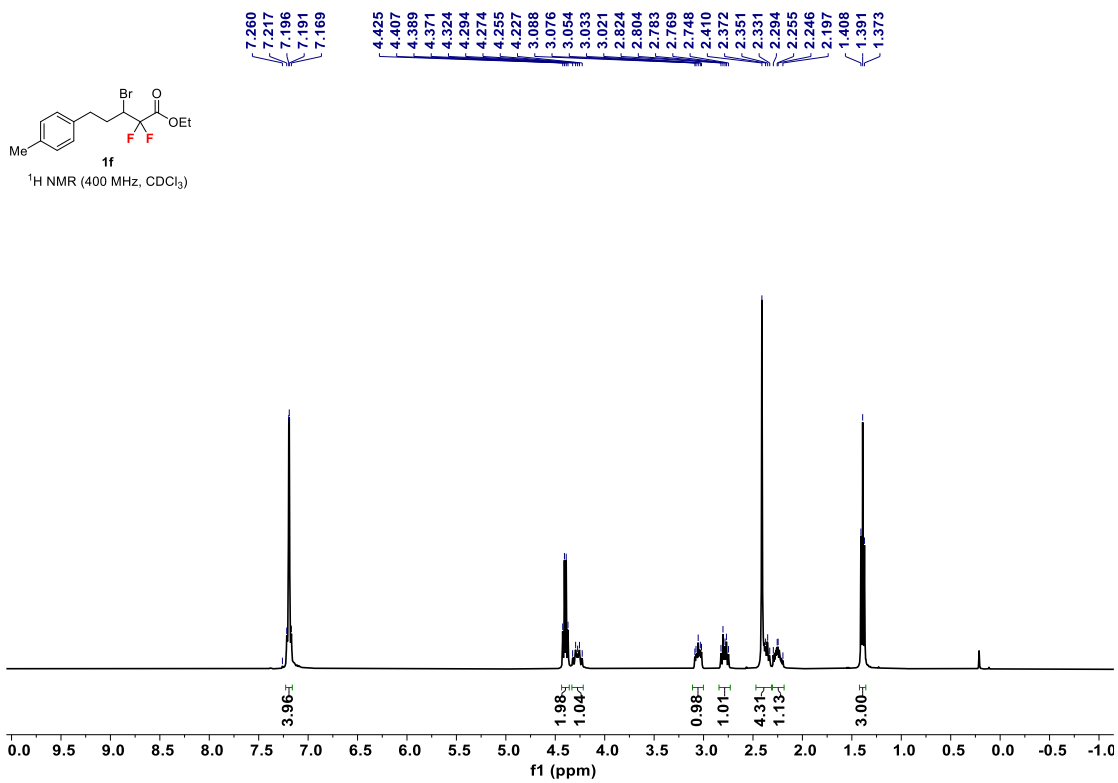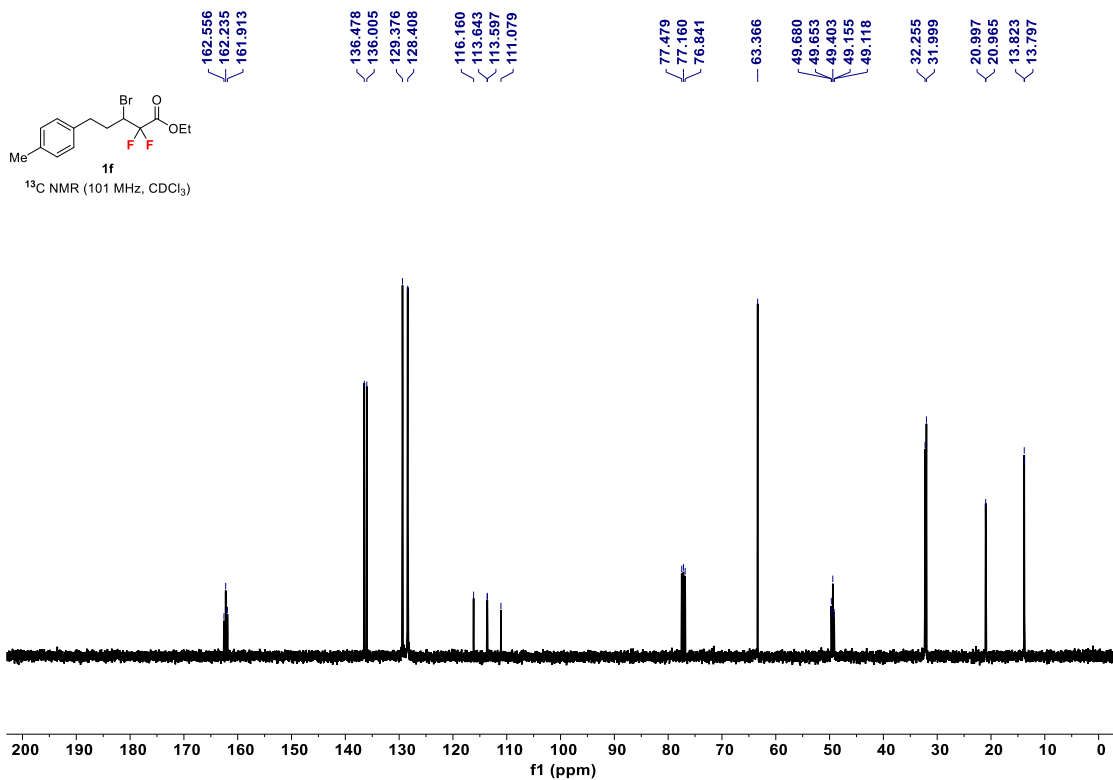

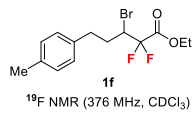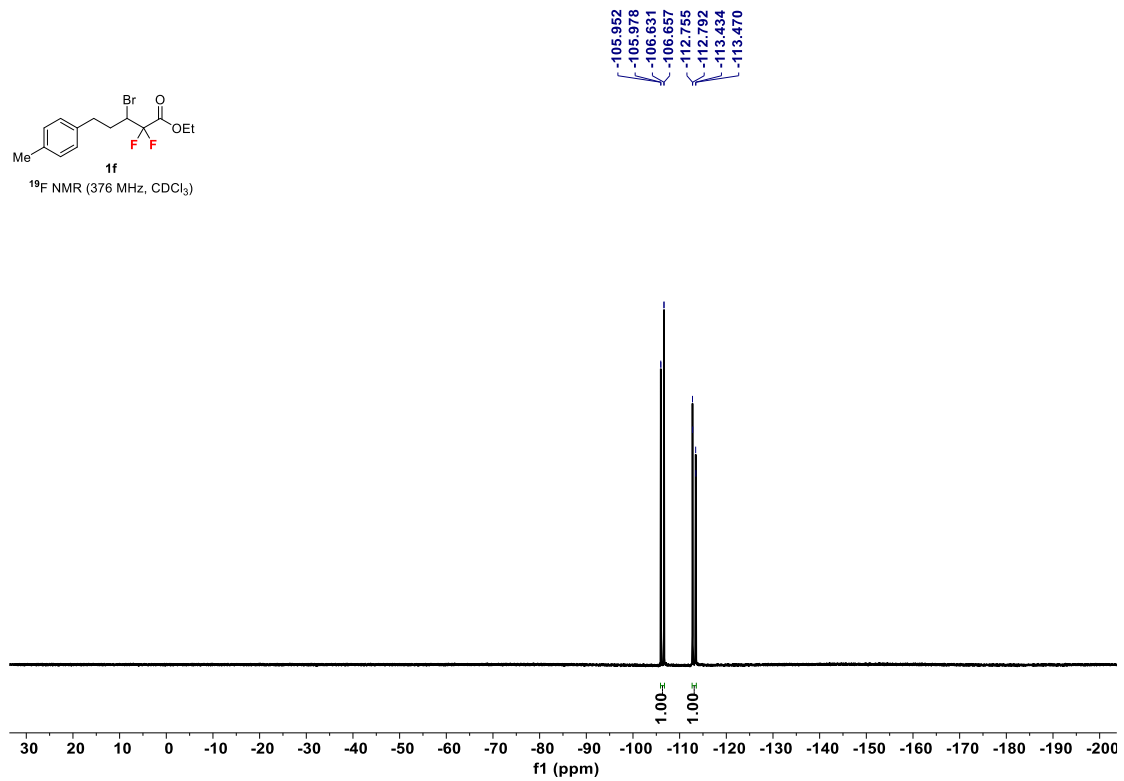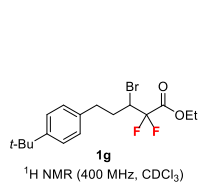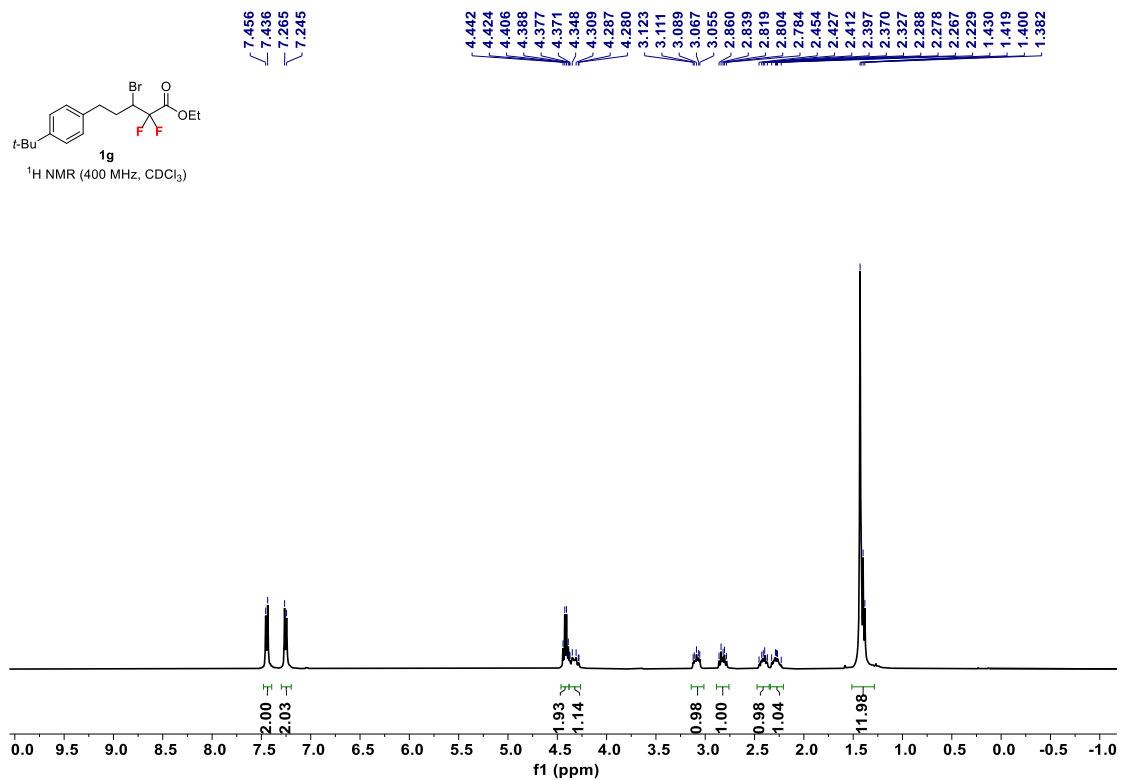

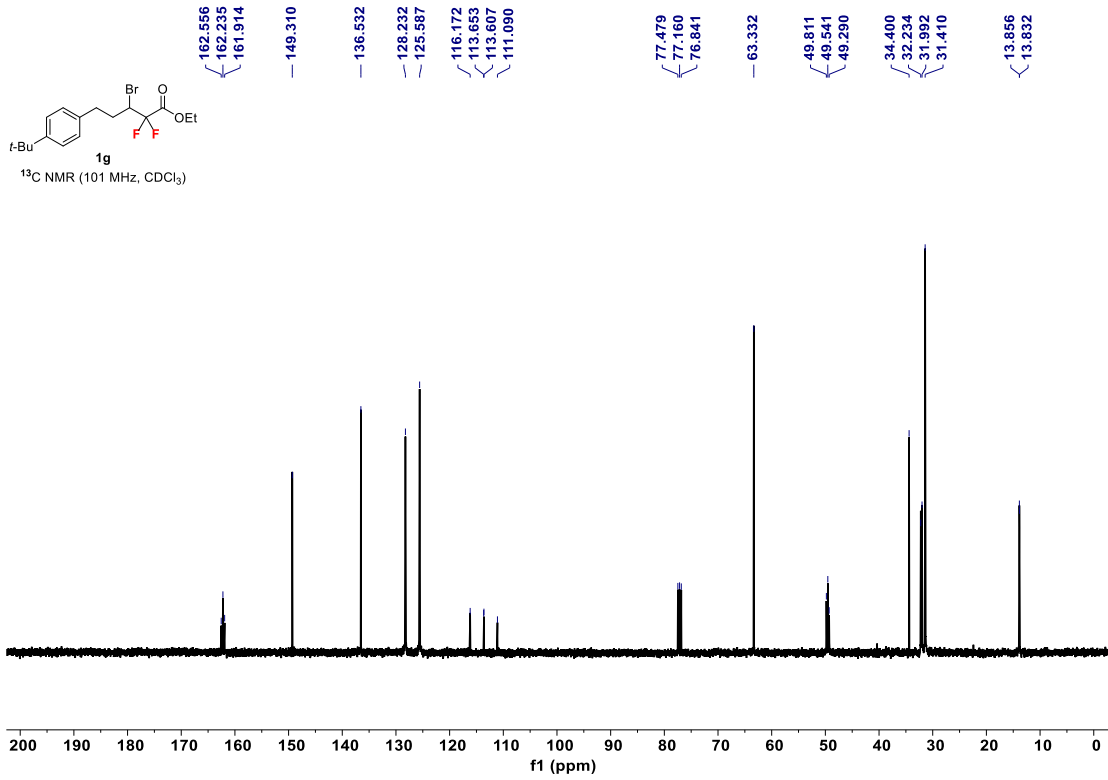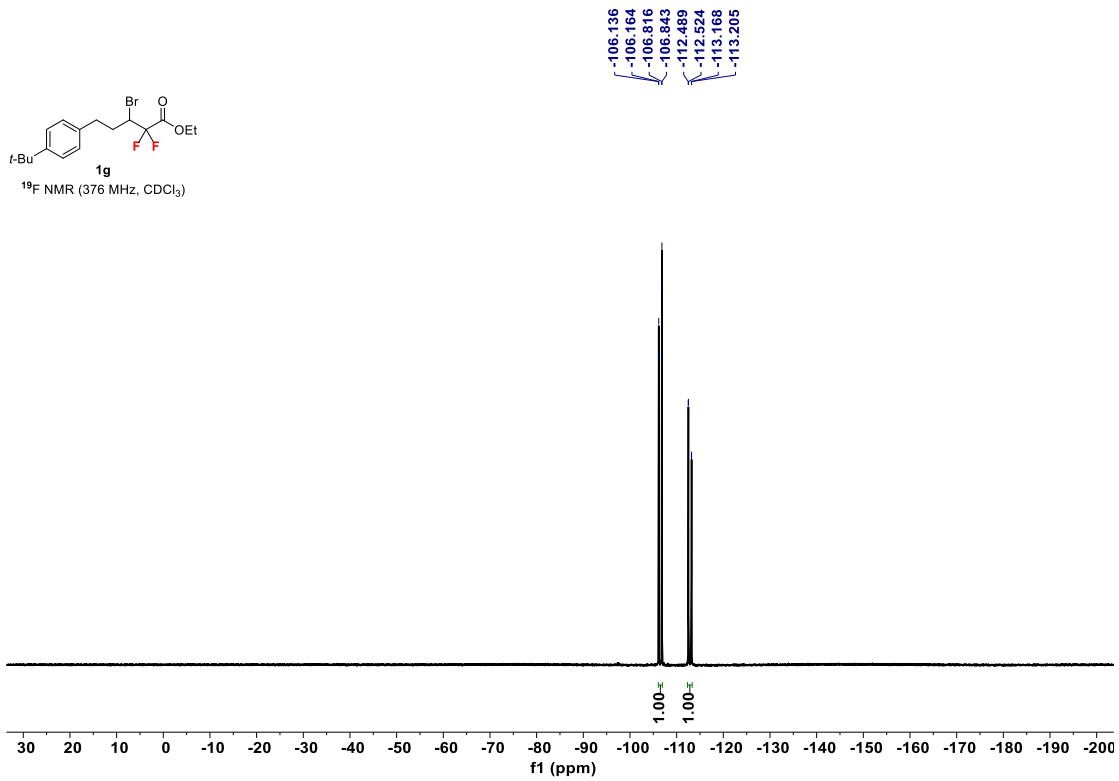

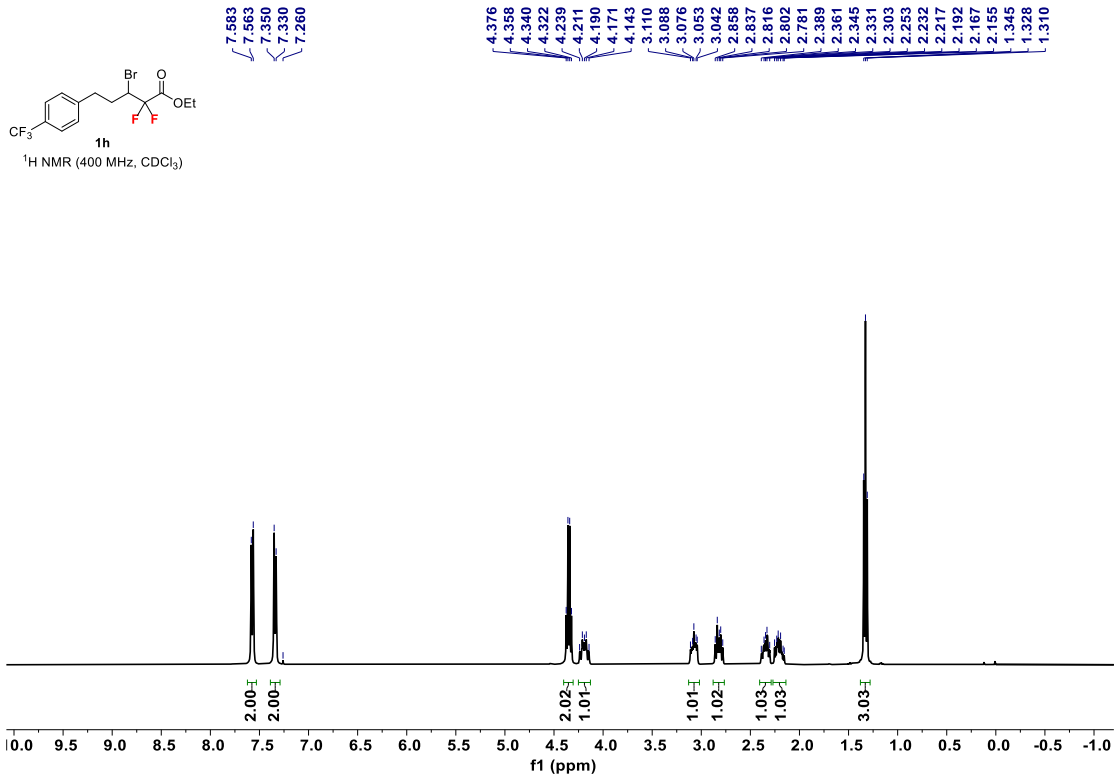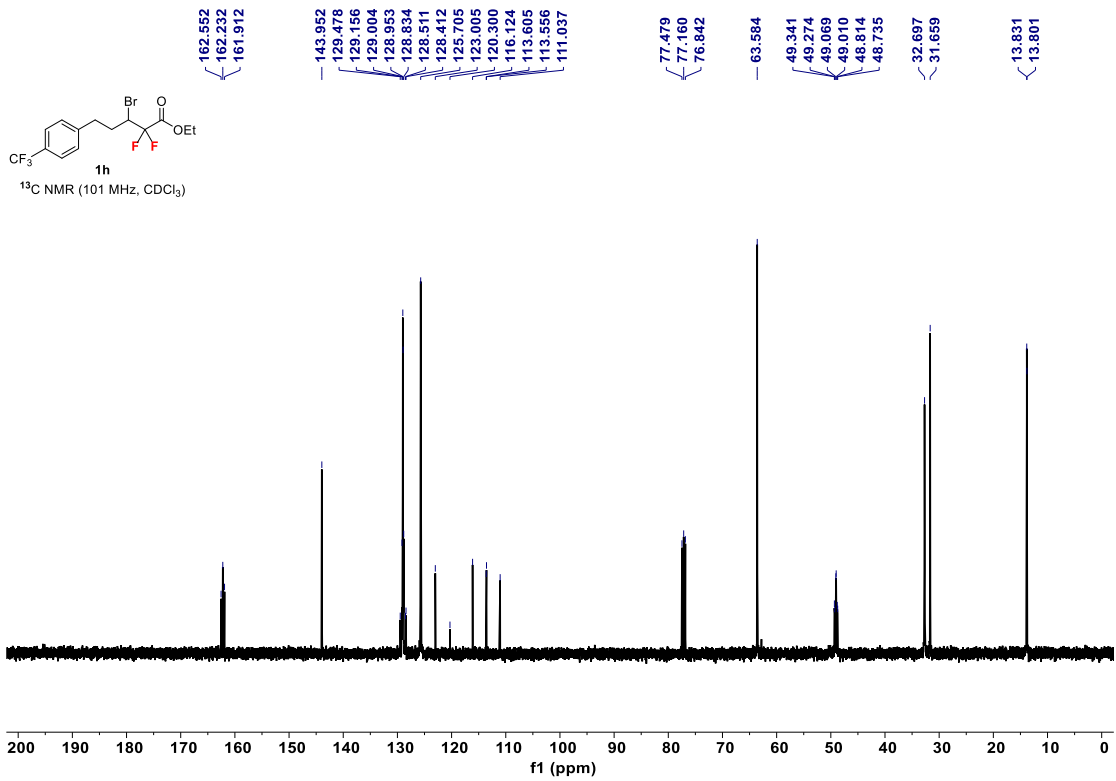

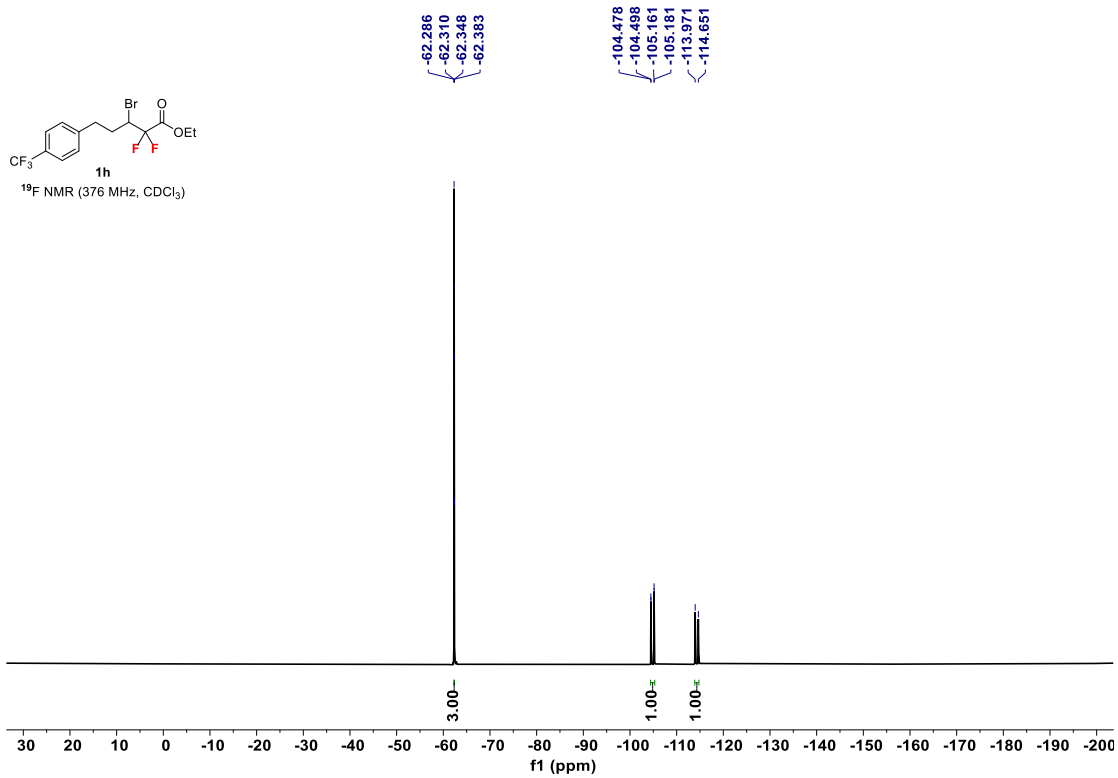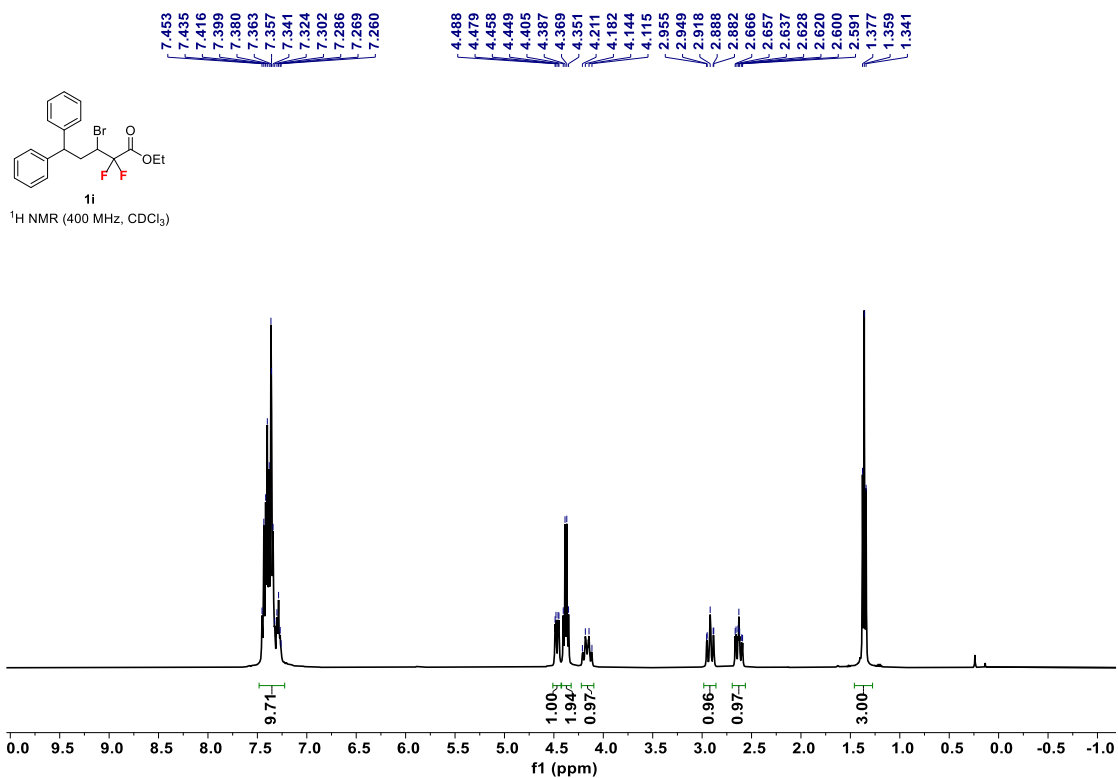

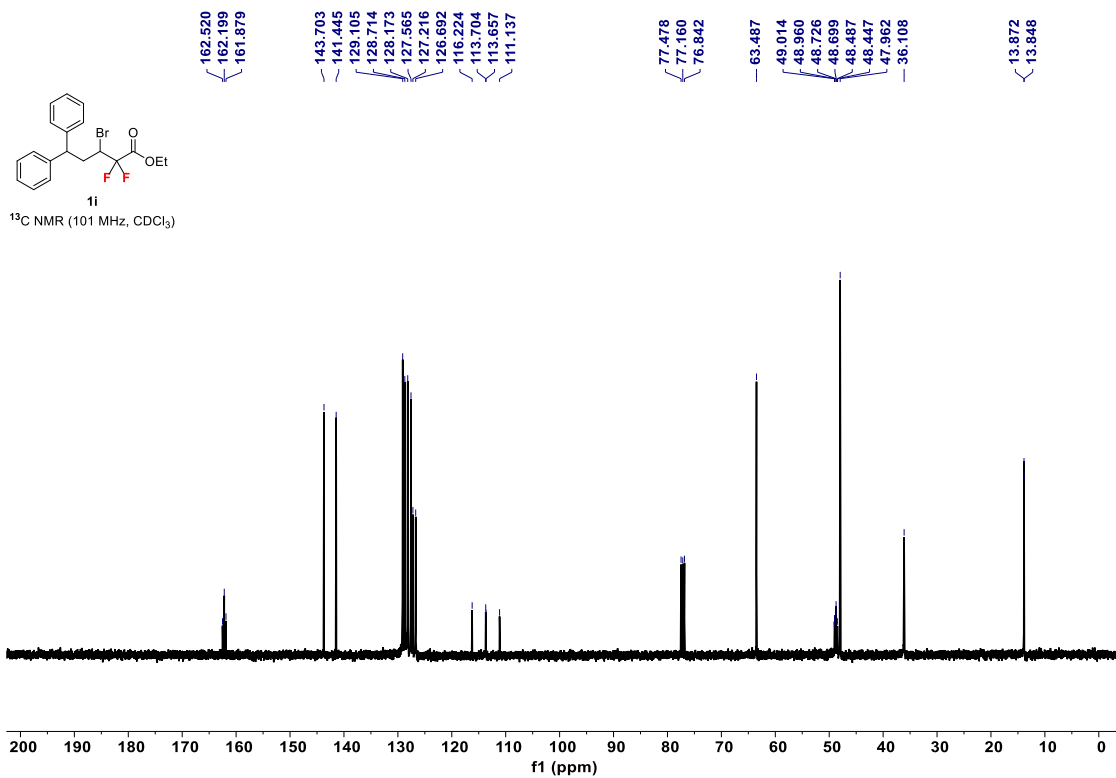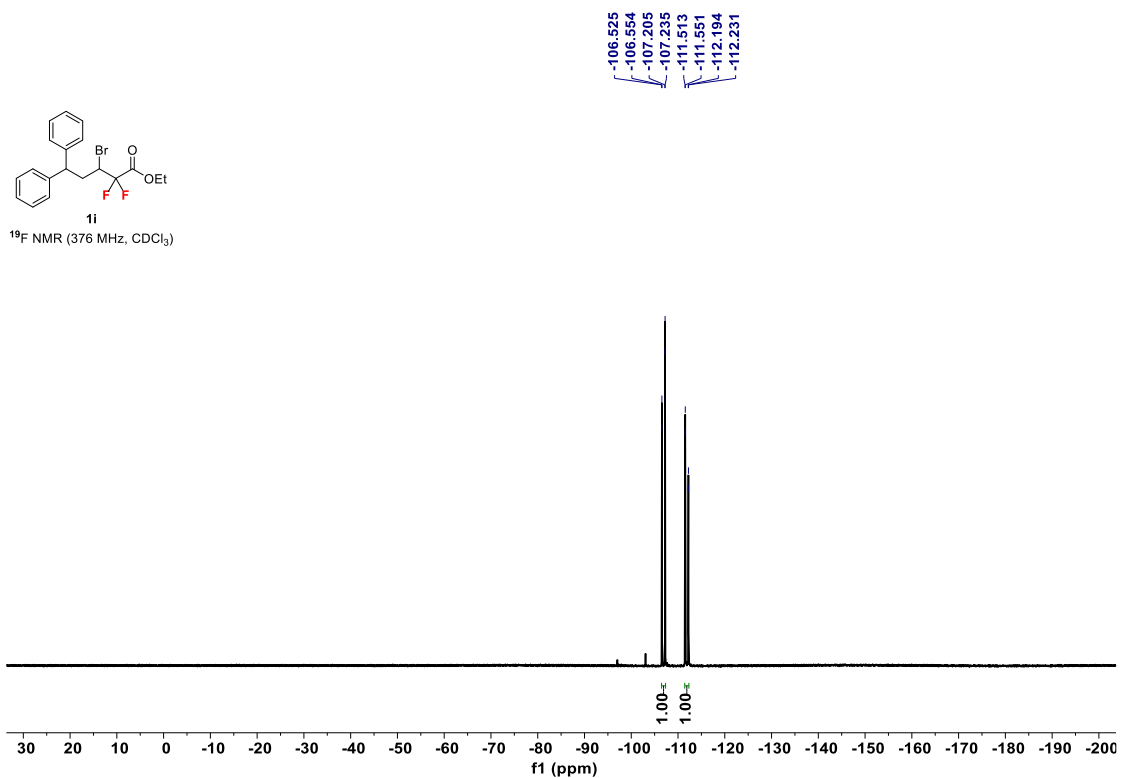



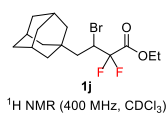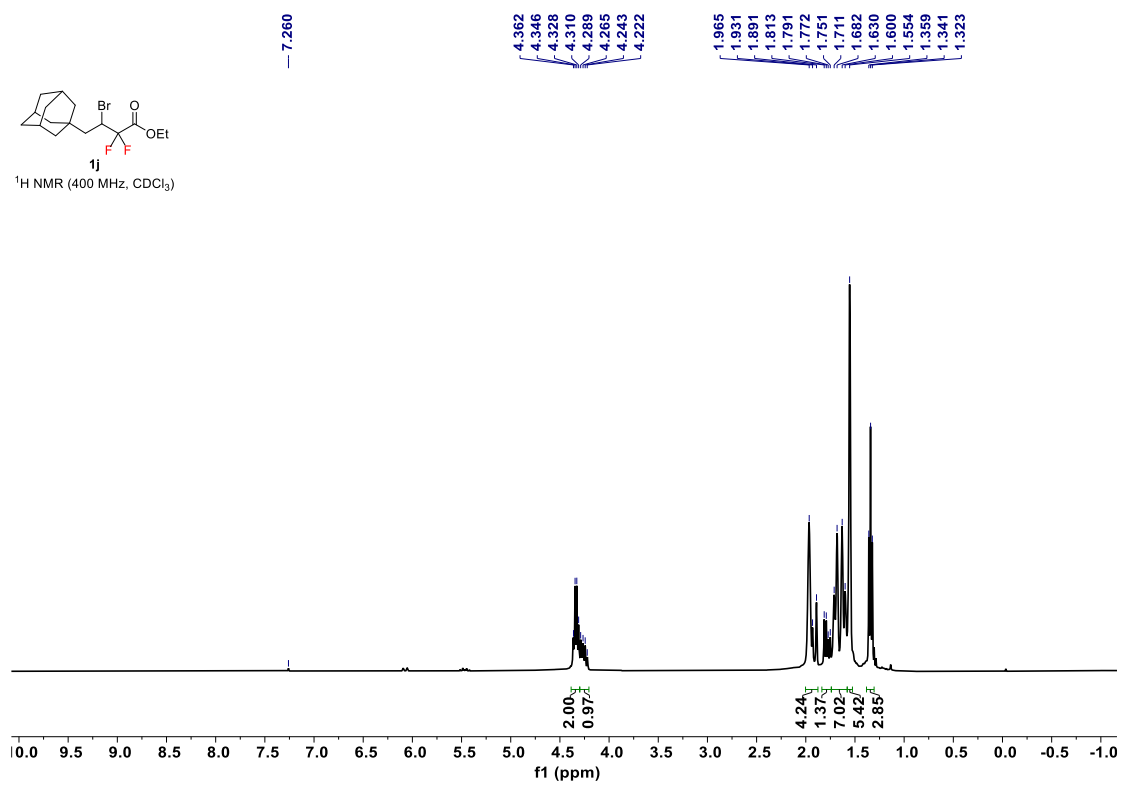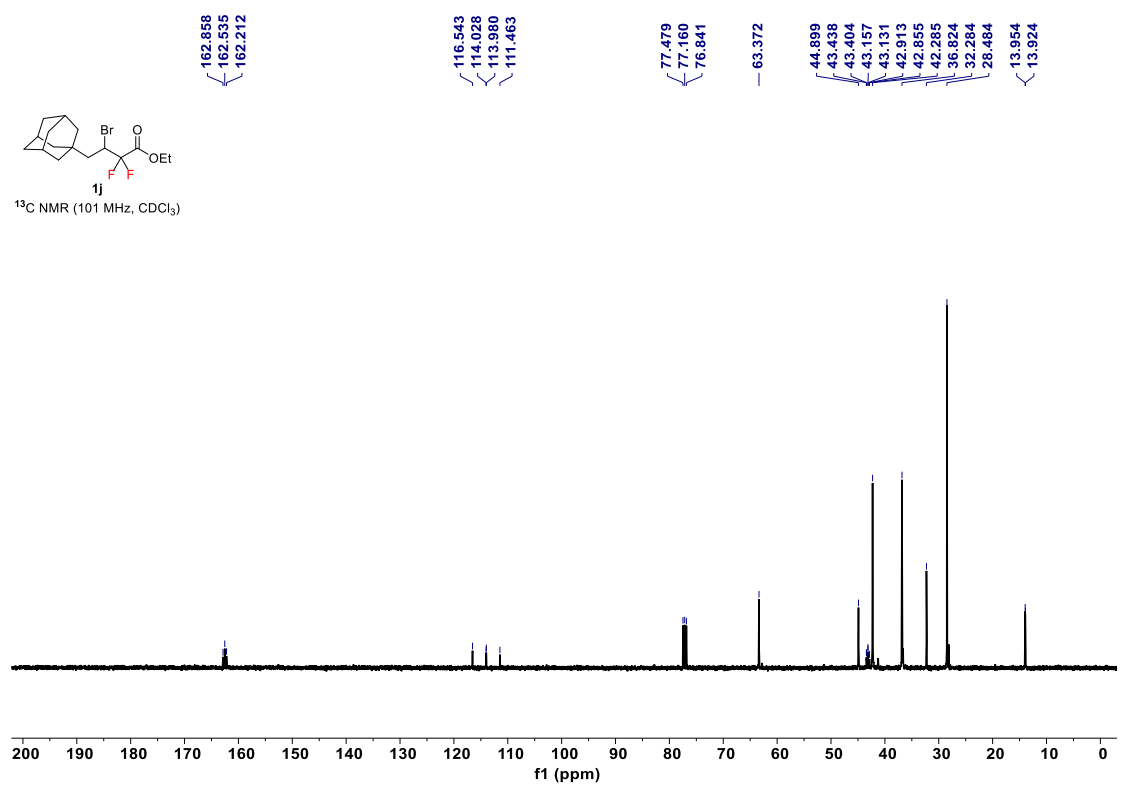

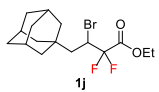

<sup>19</sup>F NMR (376 MHz, CDCl<sub>3</sub>)

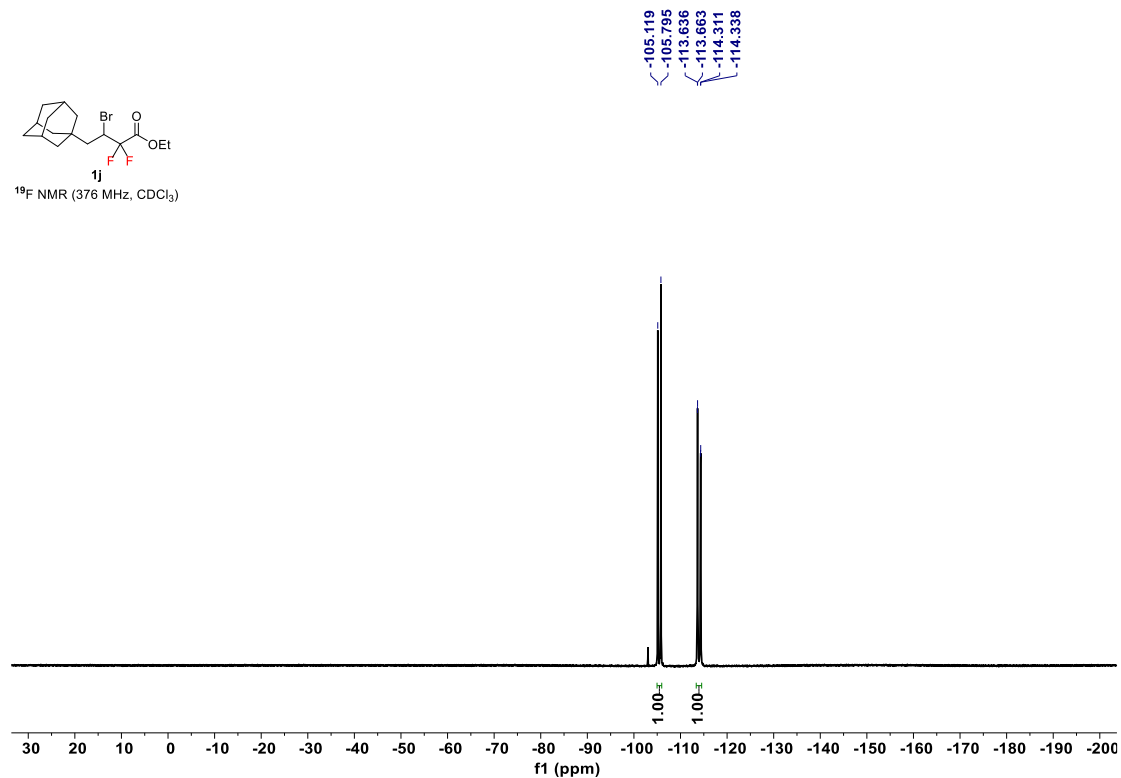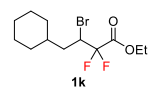

<sup>1</sup>H NMR (400 MHz, CDCl<sub>3</sub>)

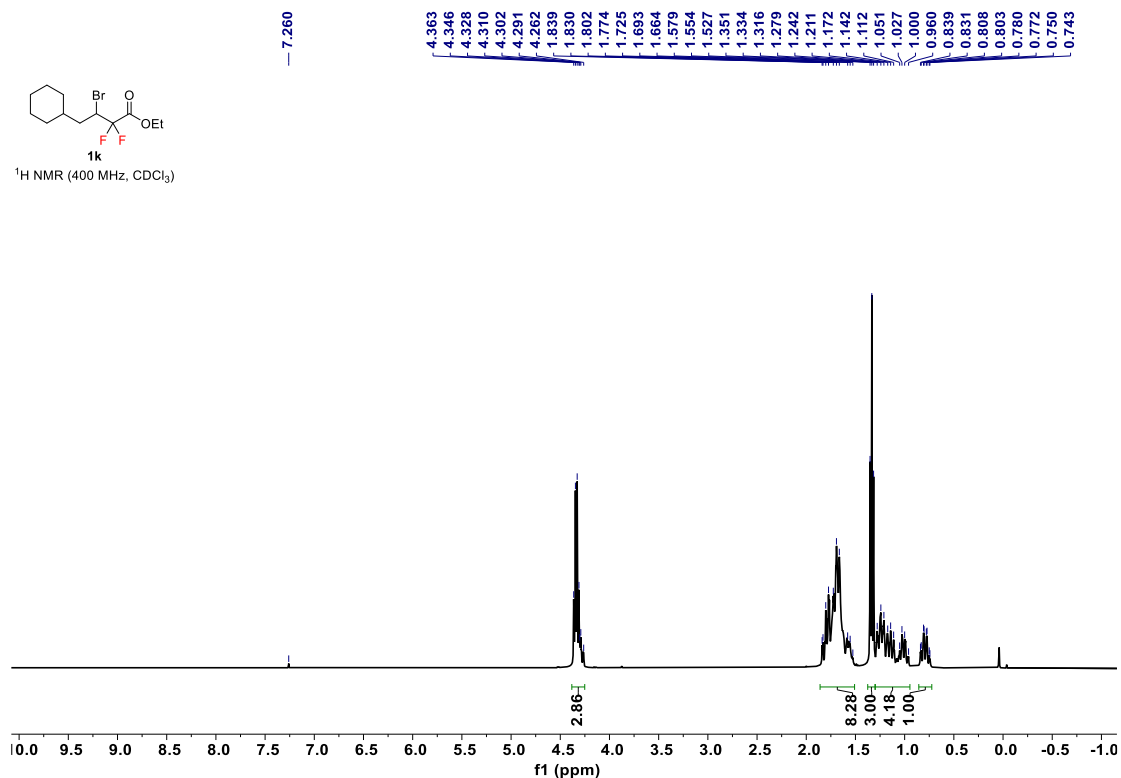

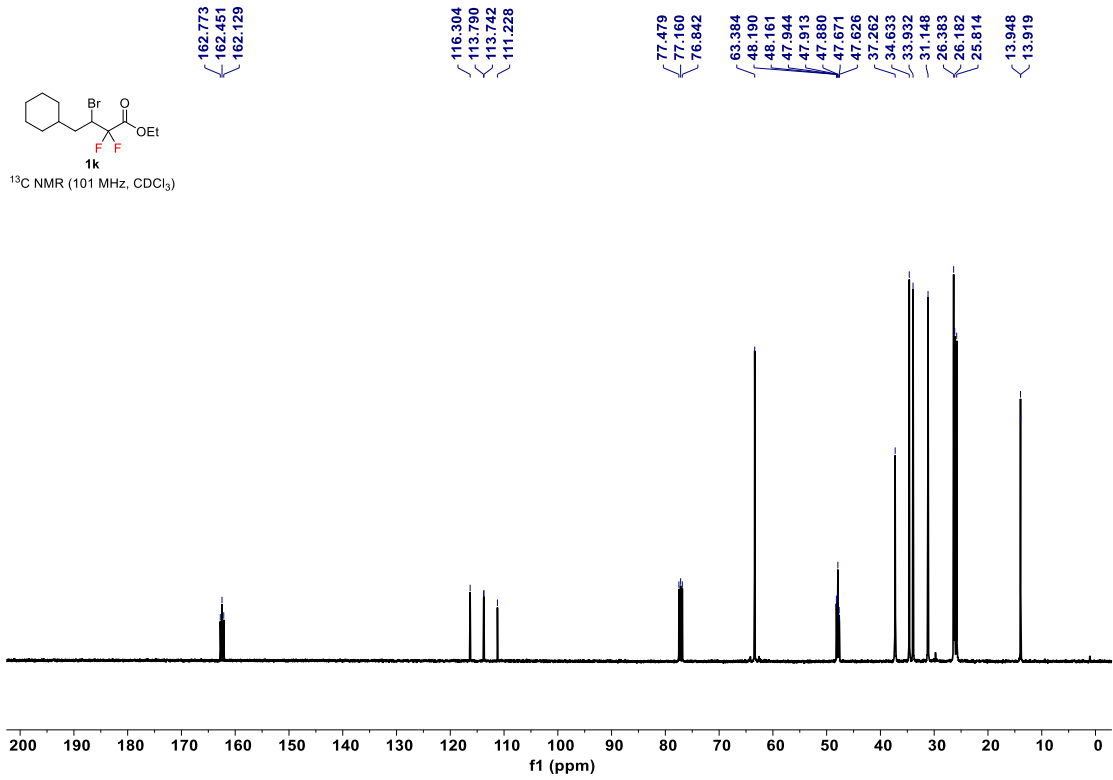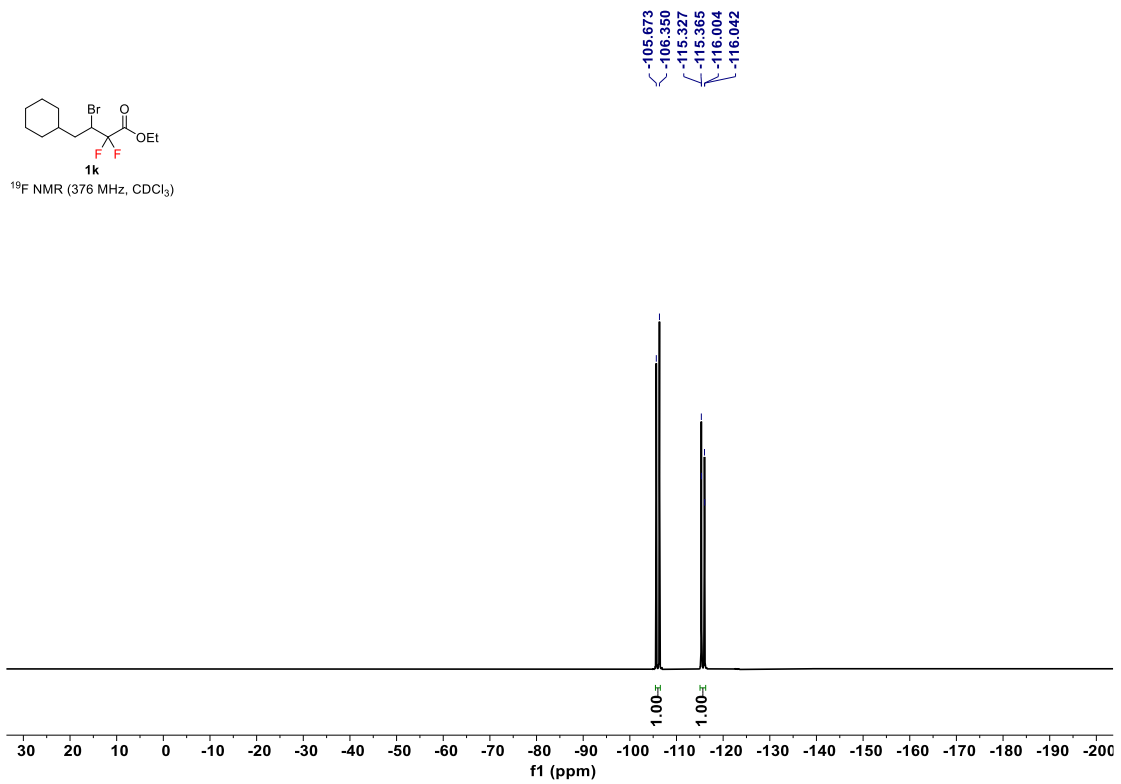

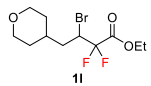

<sup>1</sup>H NMR (400 MHz, CDCl<sub>3</sub>)

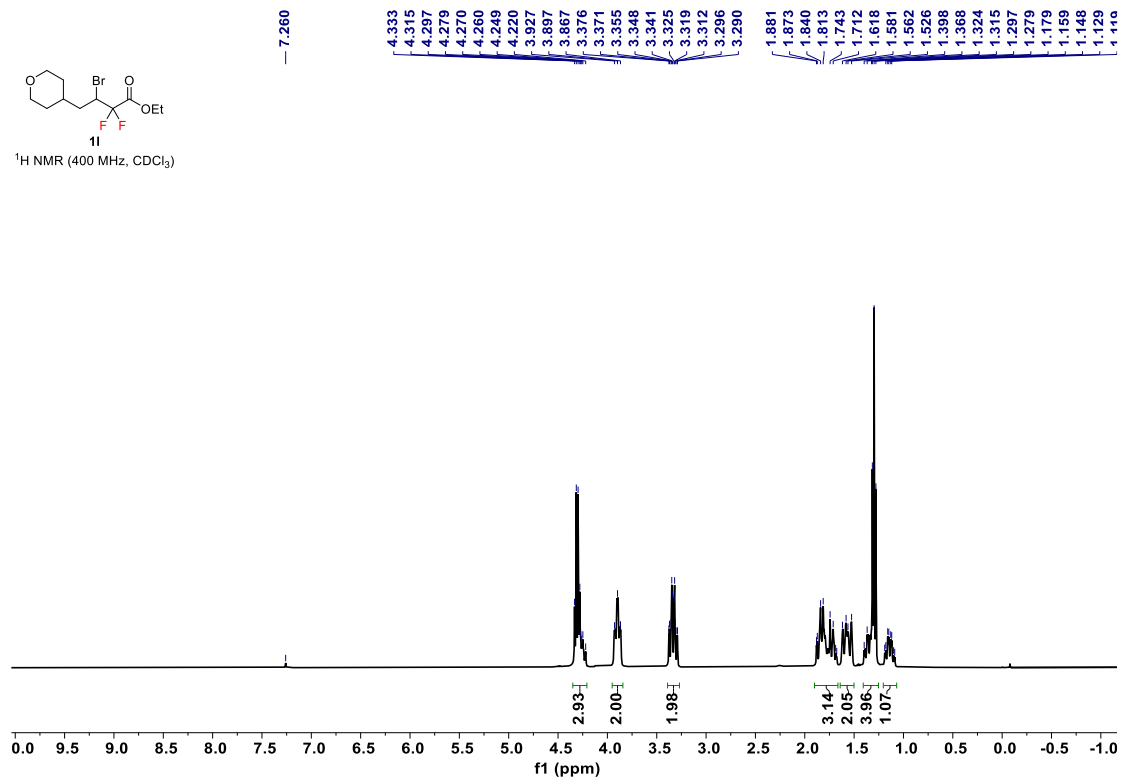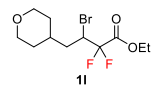

<sup>13</sup>C NMR (101 MHz, CDCl<sub>3</sub>)

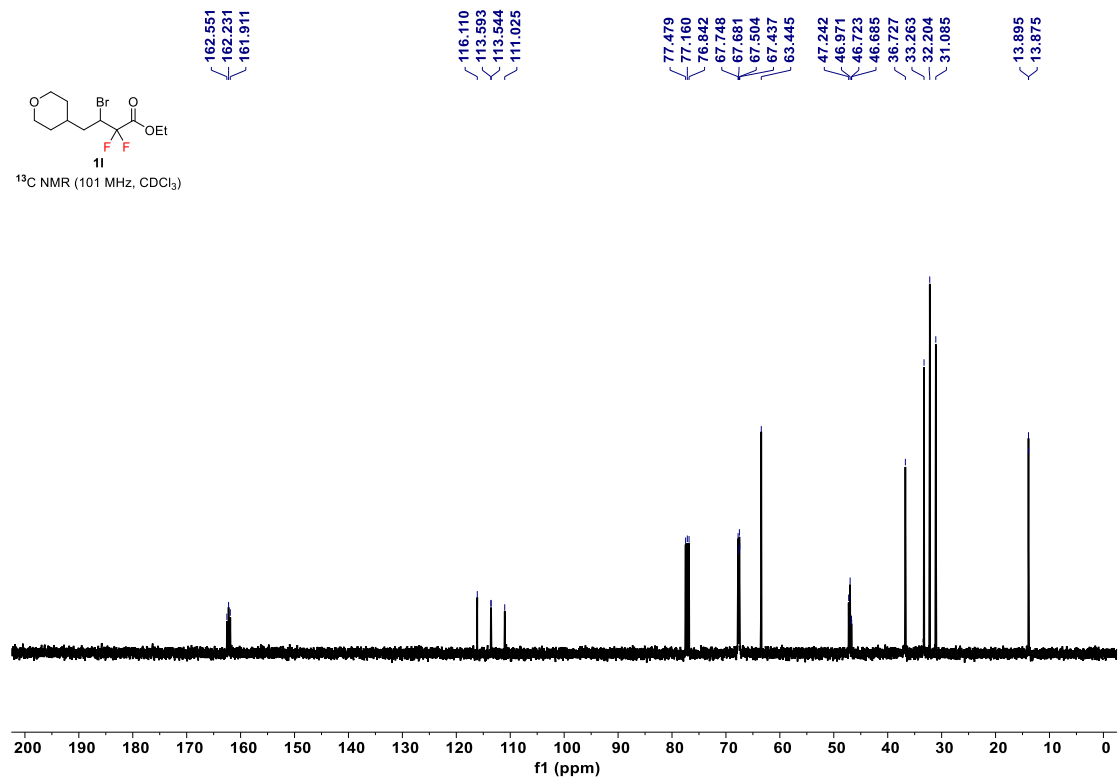

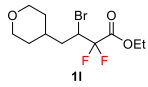

<sup>19</sup>F NMR (376 MHz, CDCl<sub>3</sub>)

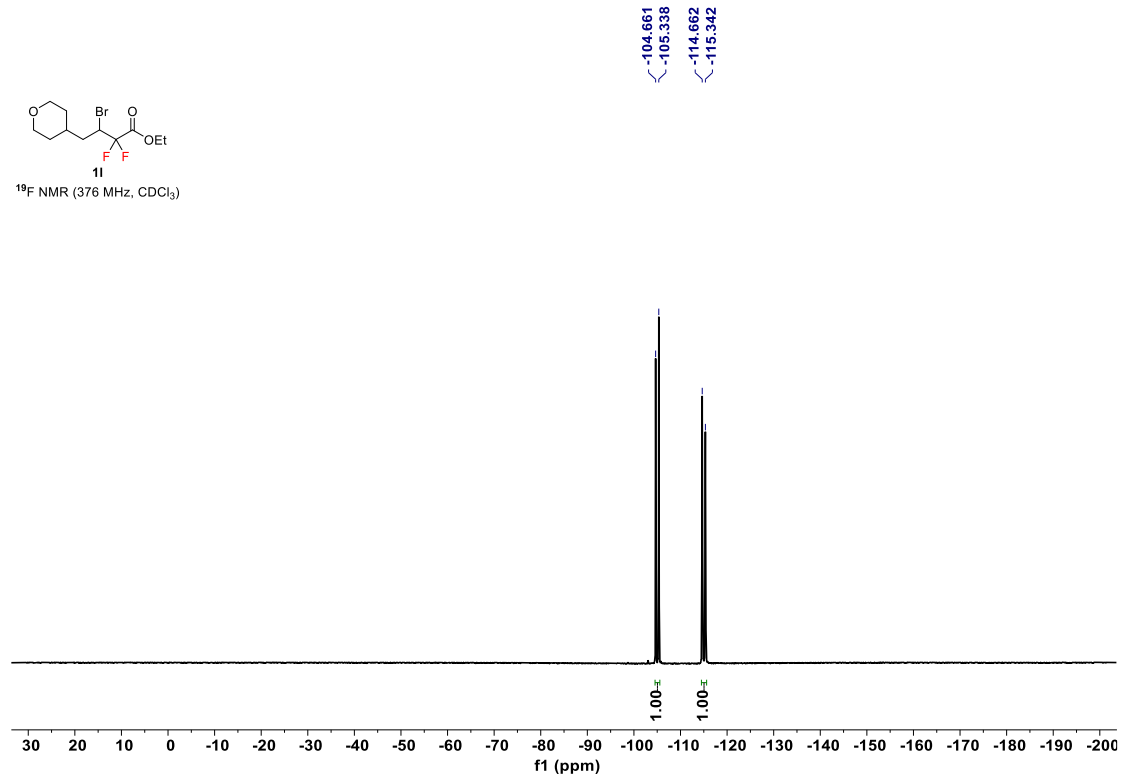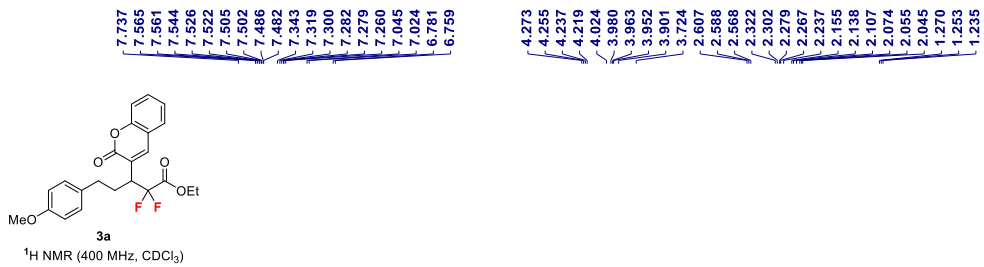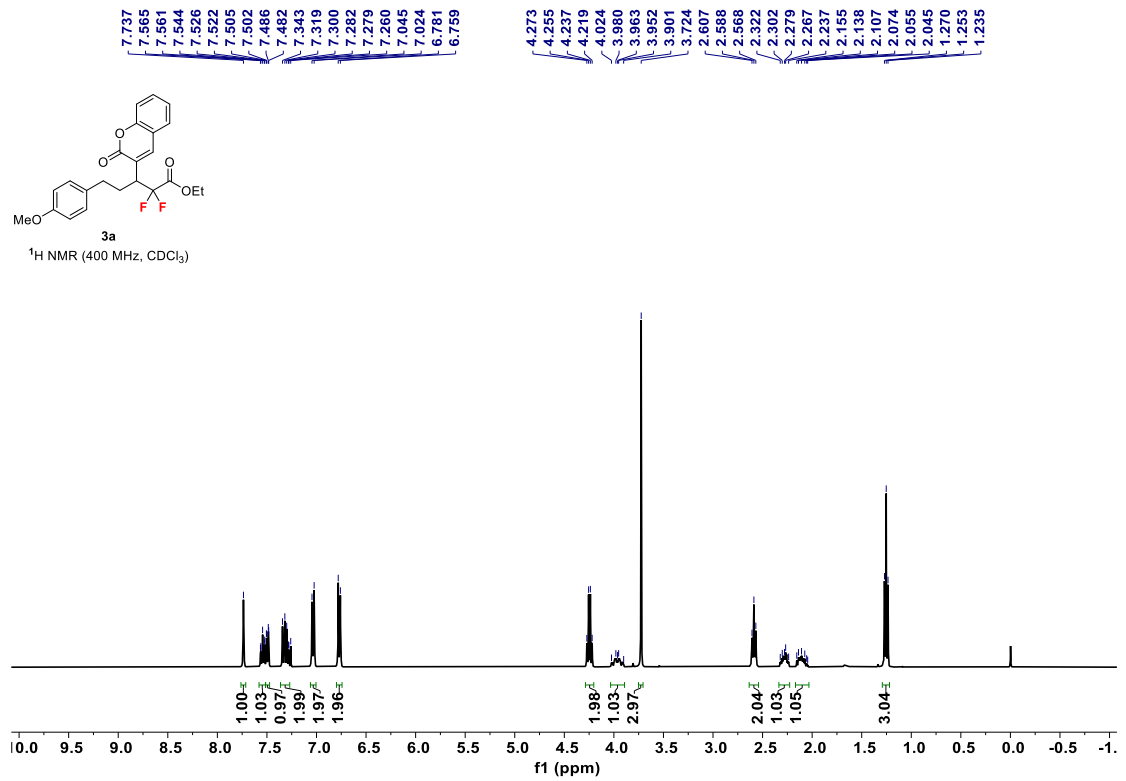

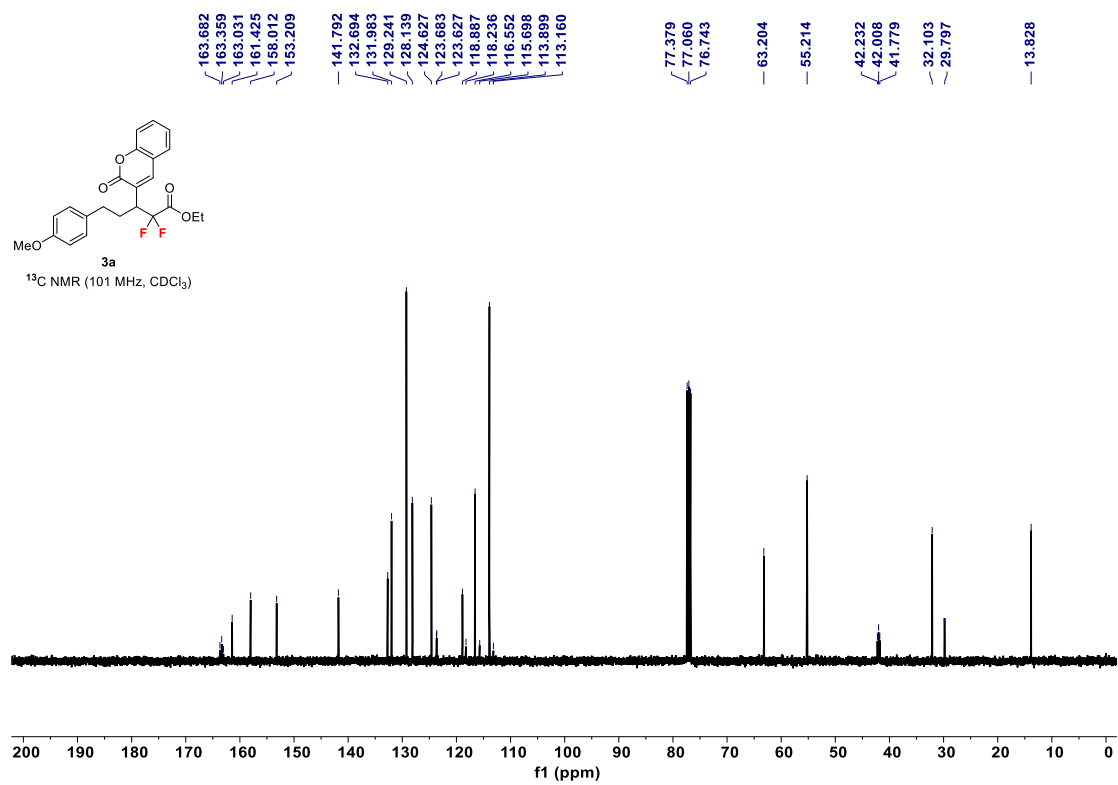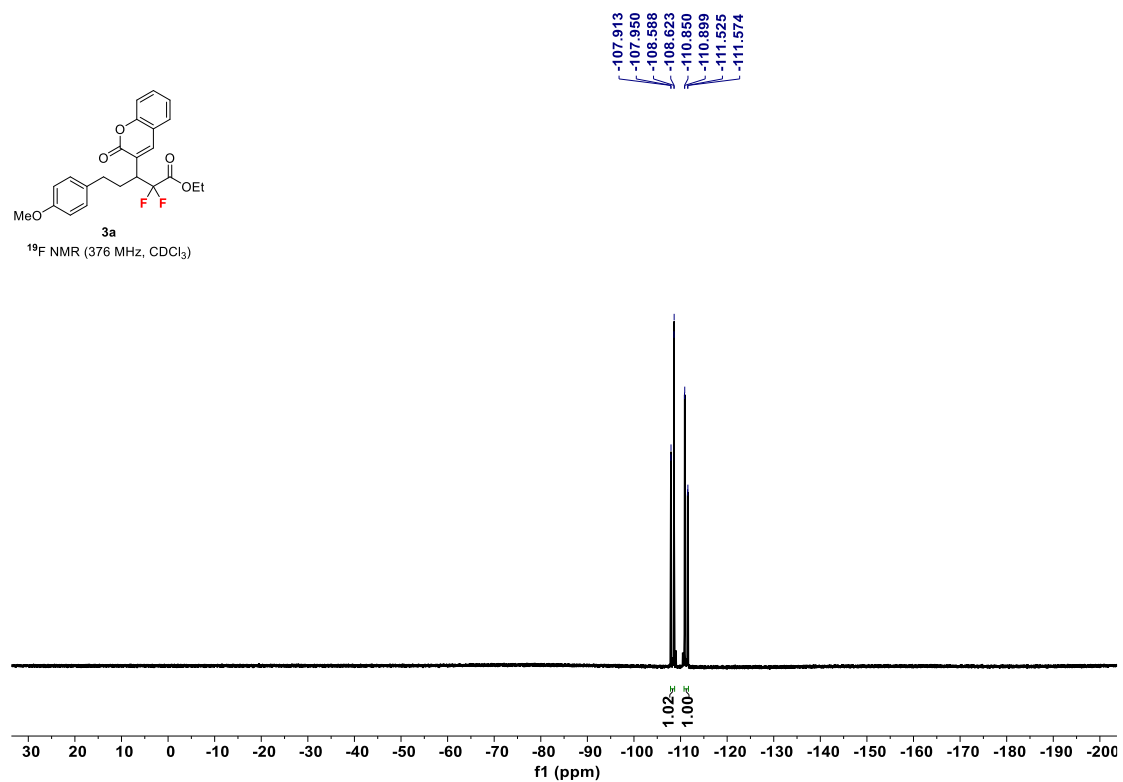

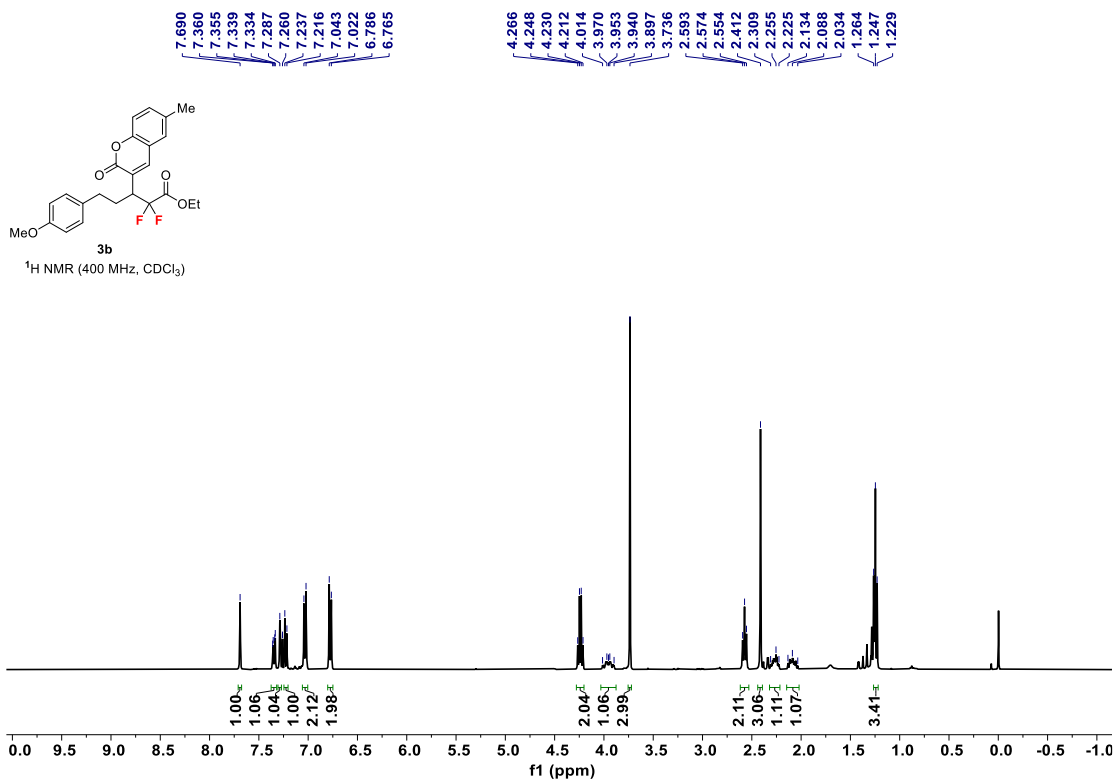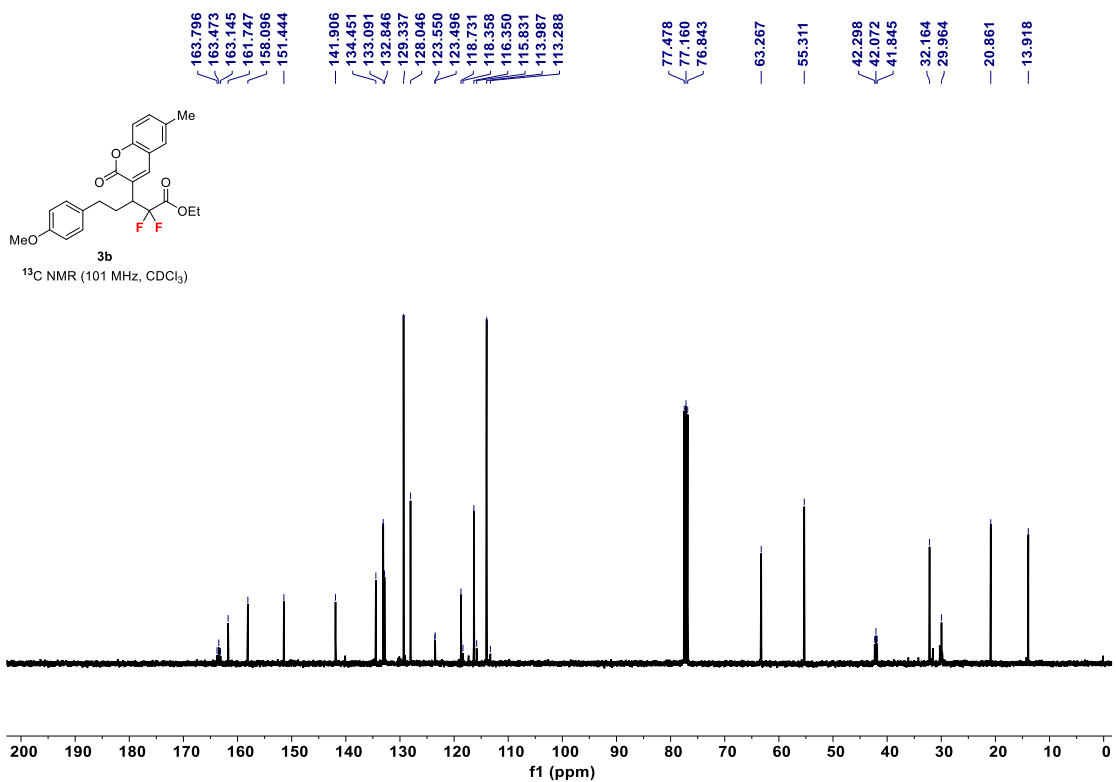

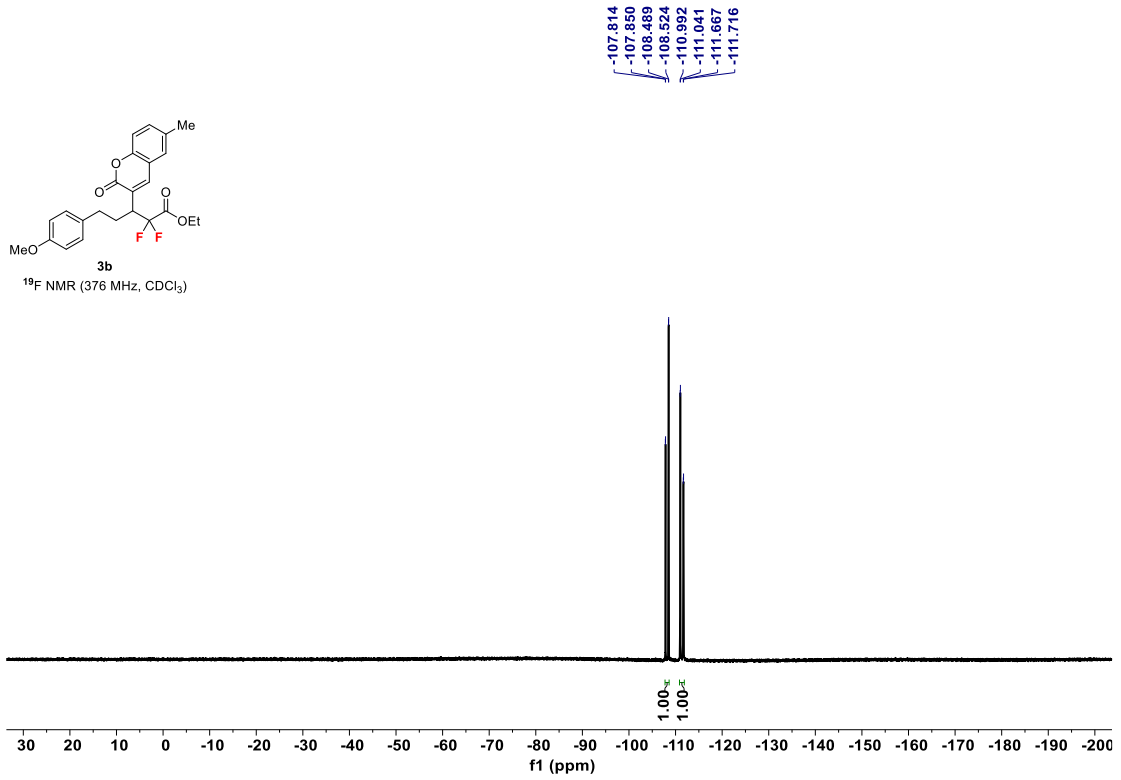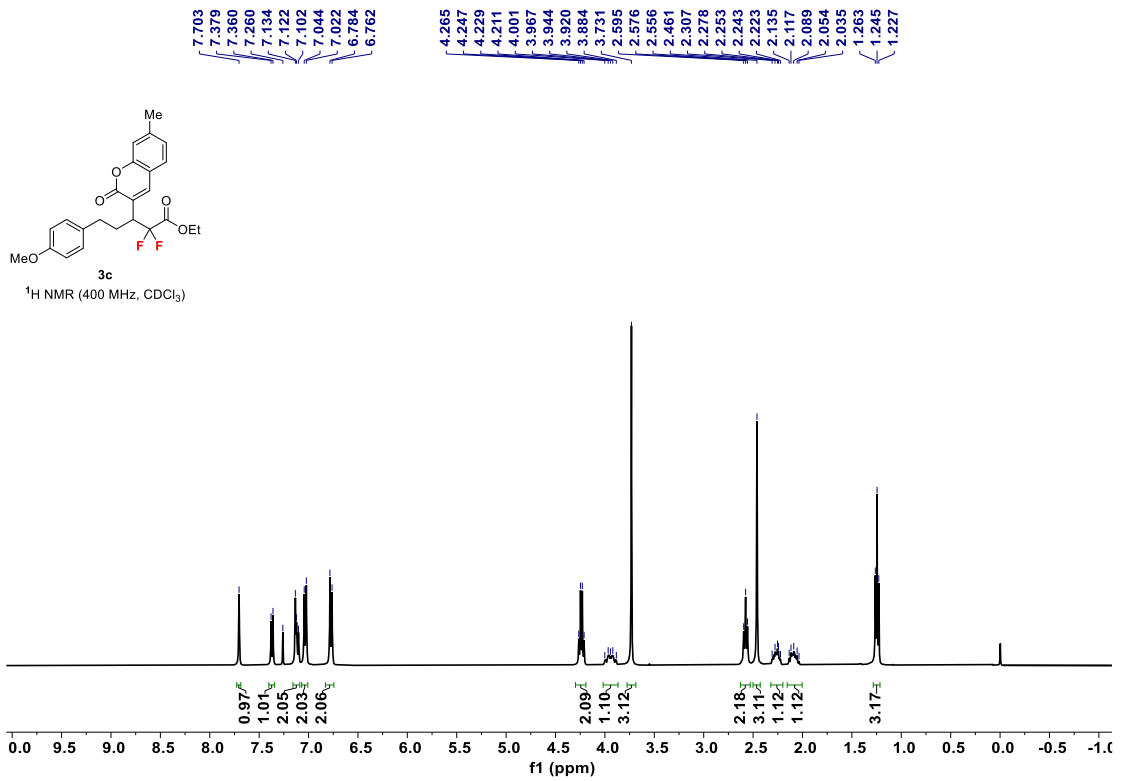



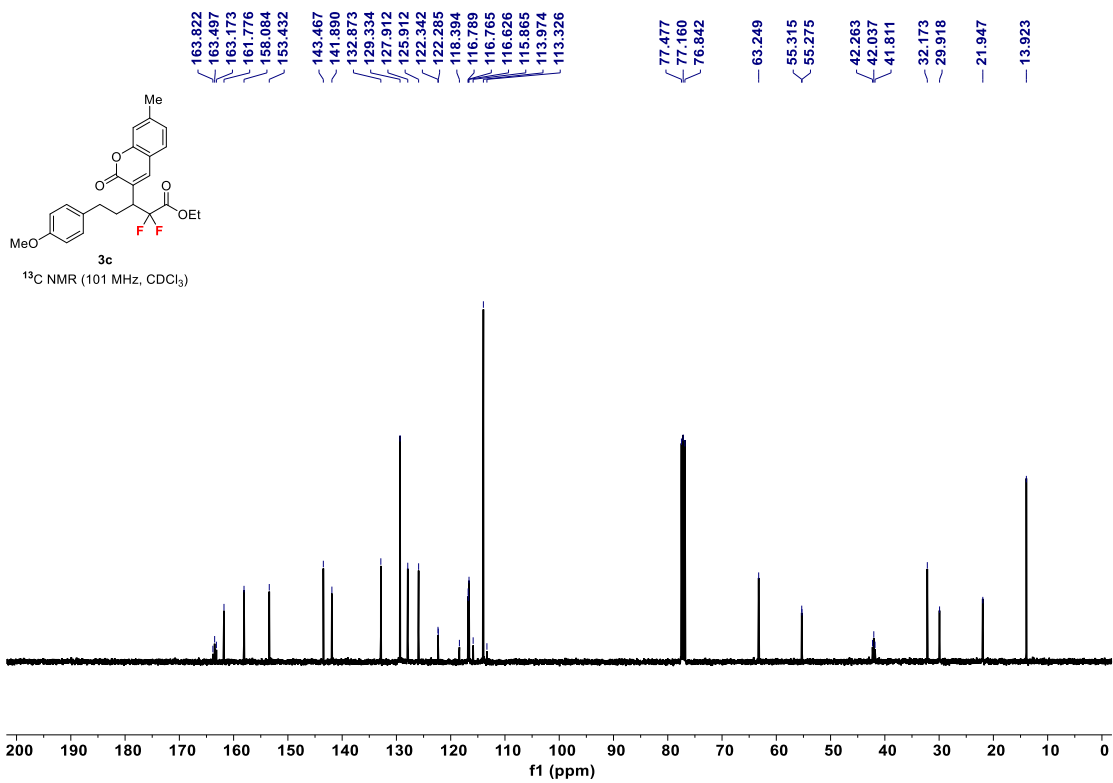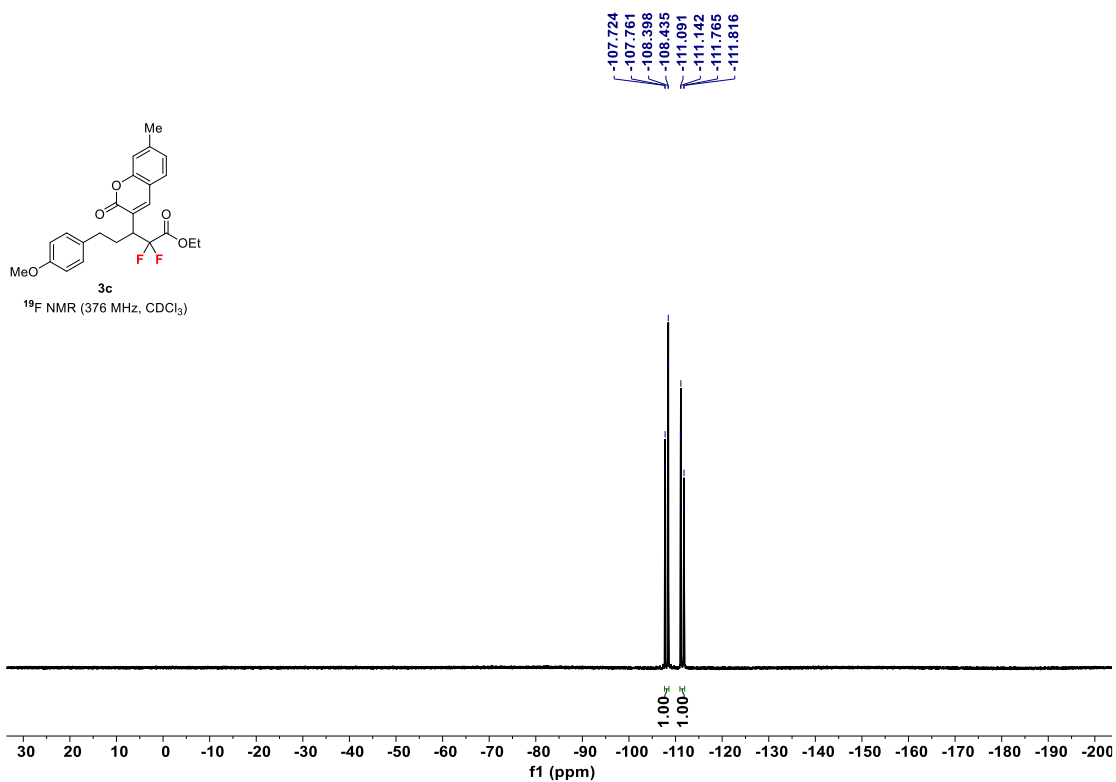

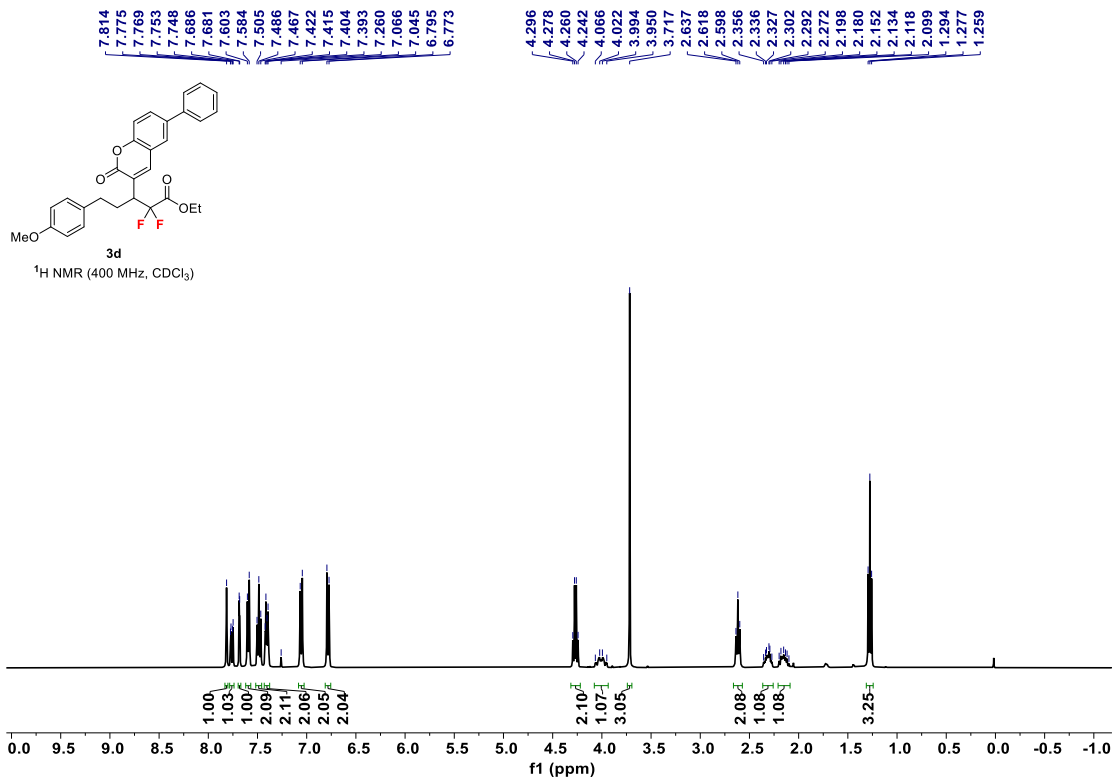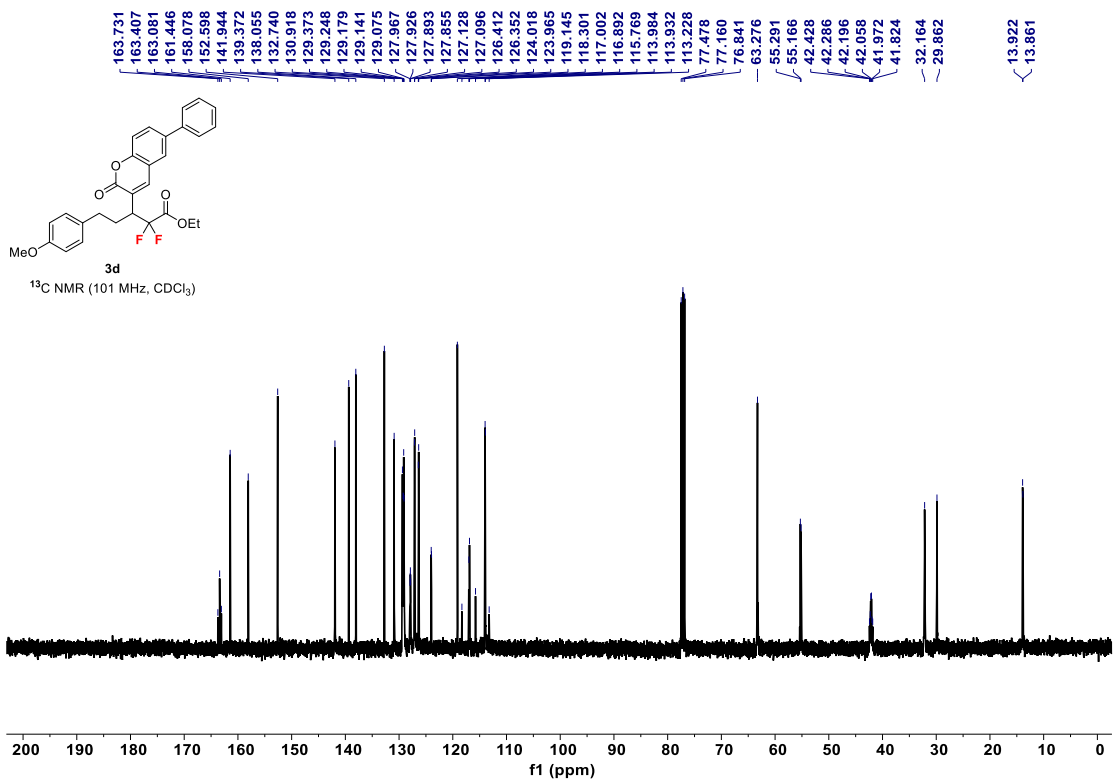

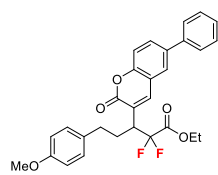

$^{19}\text{F}$  NMR (376 MHz,  $\text{CDCl}_3$ )

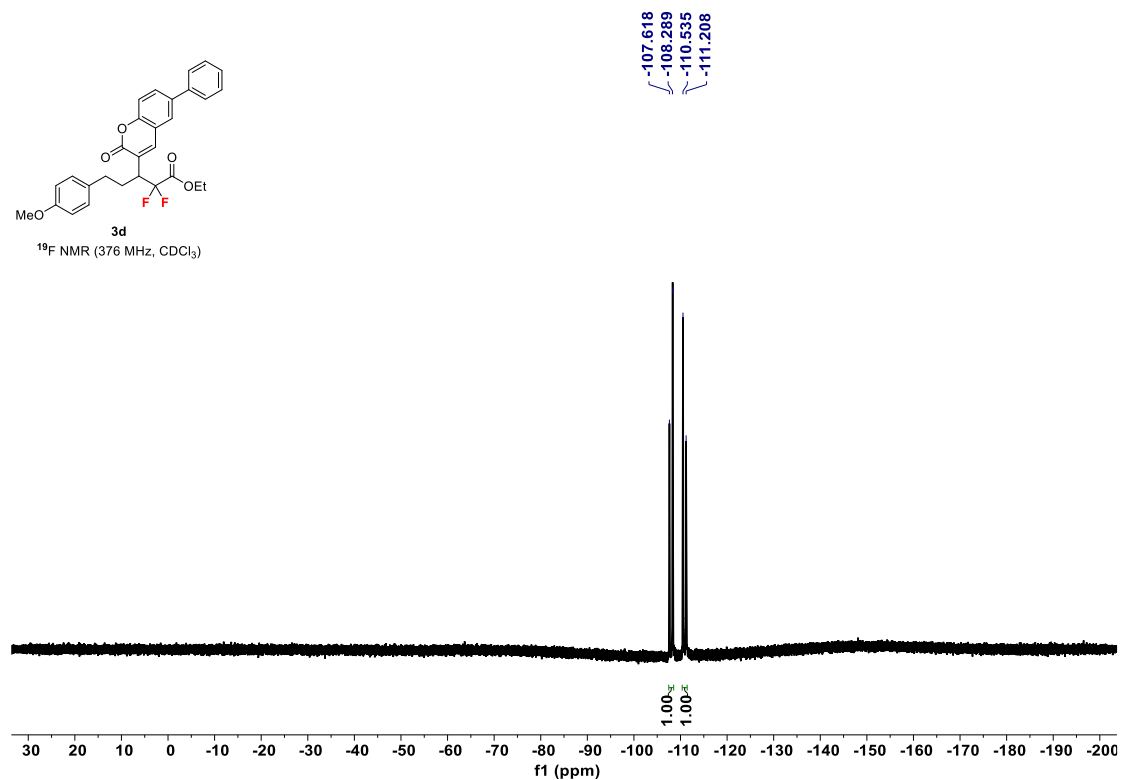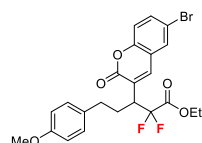

$^1\text{H}$  NMR (400 MHz,  $\text{CDCl}_3$ )

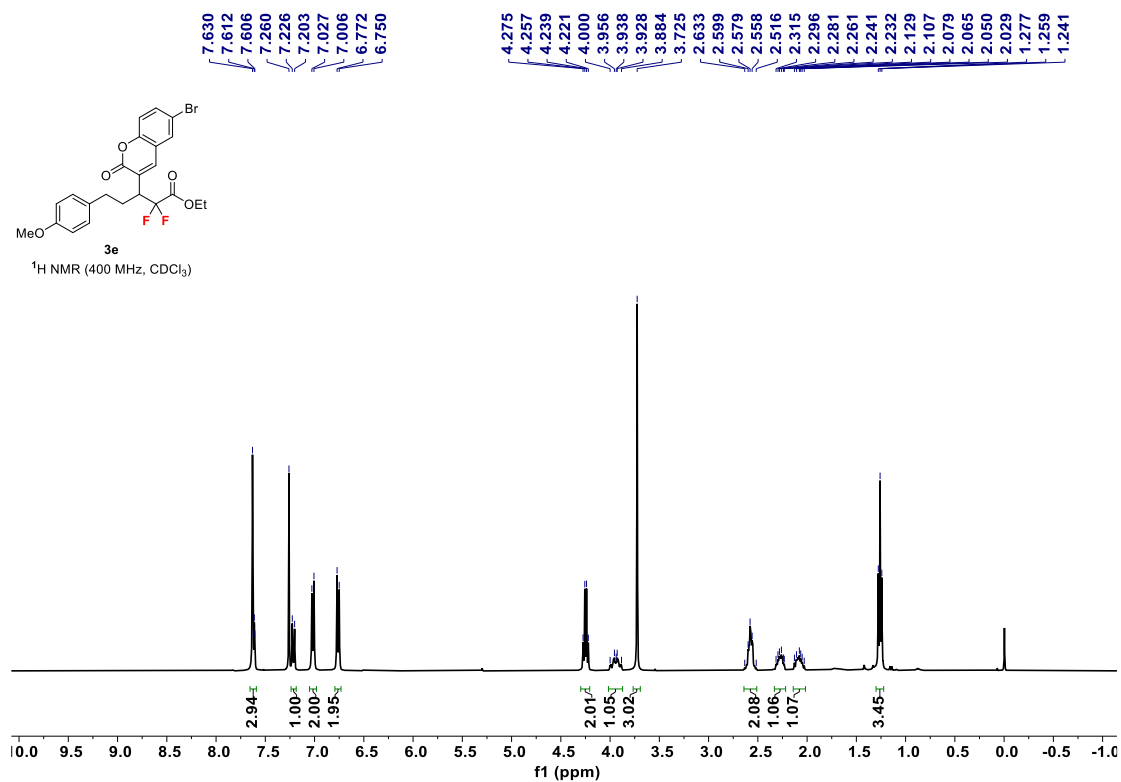

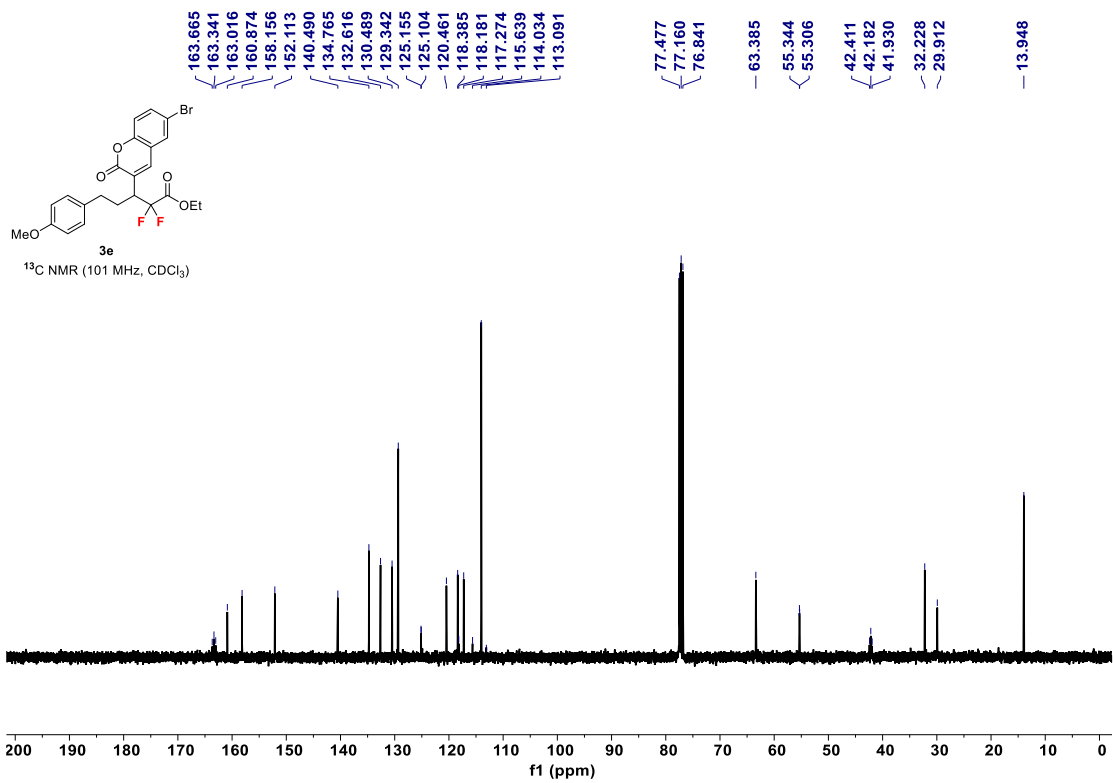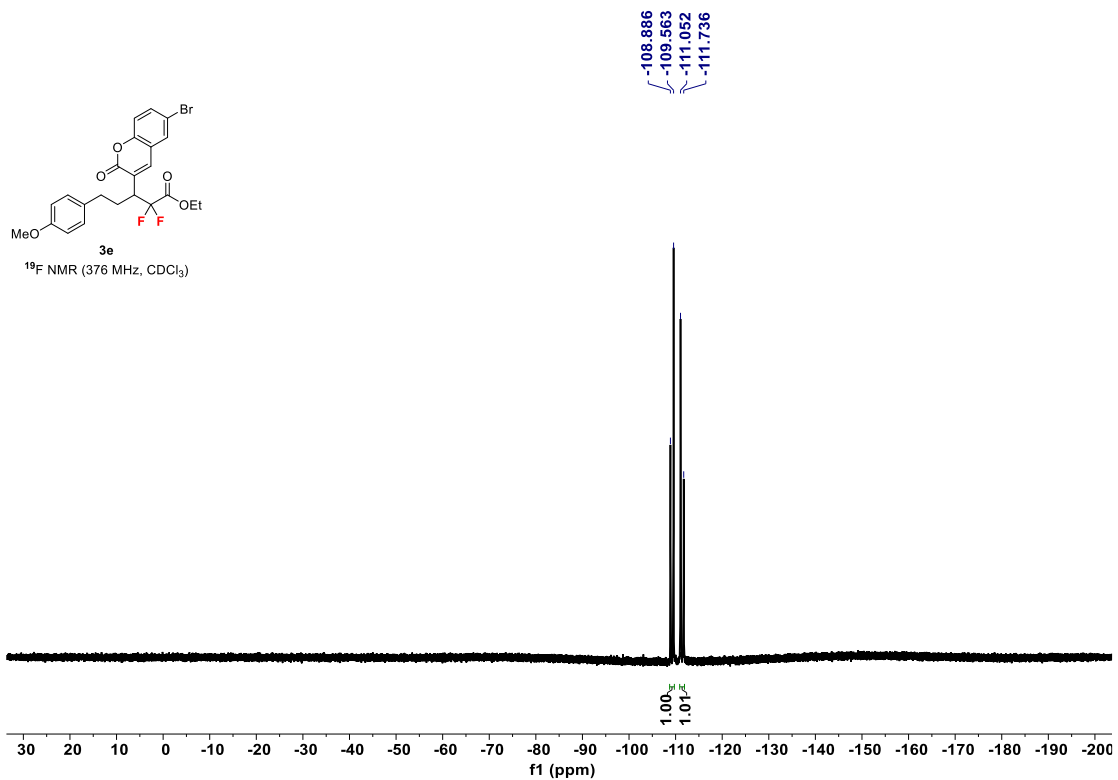

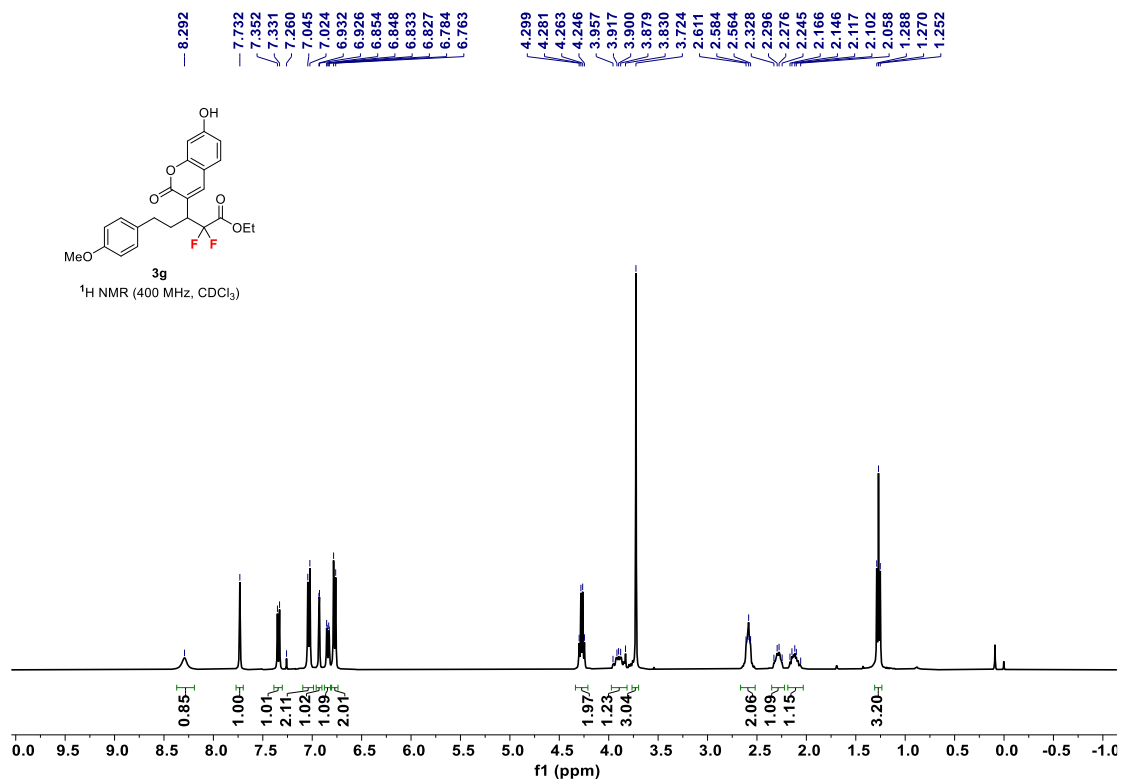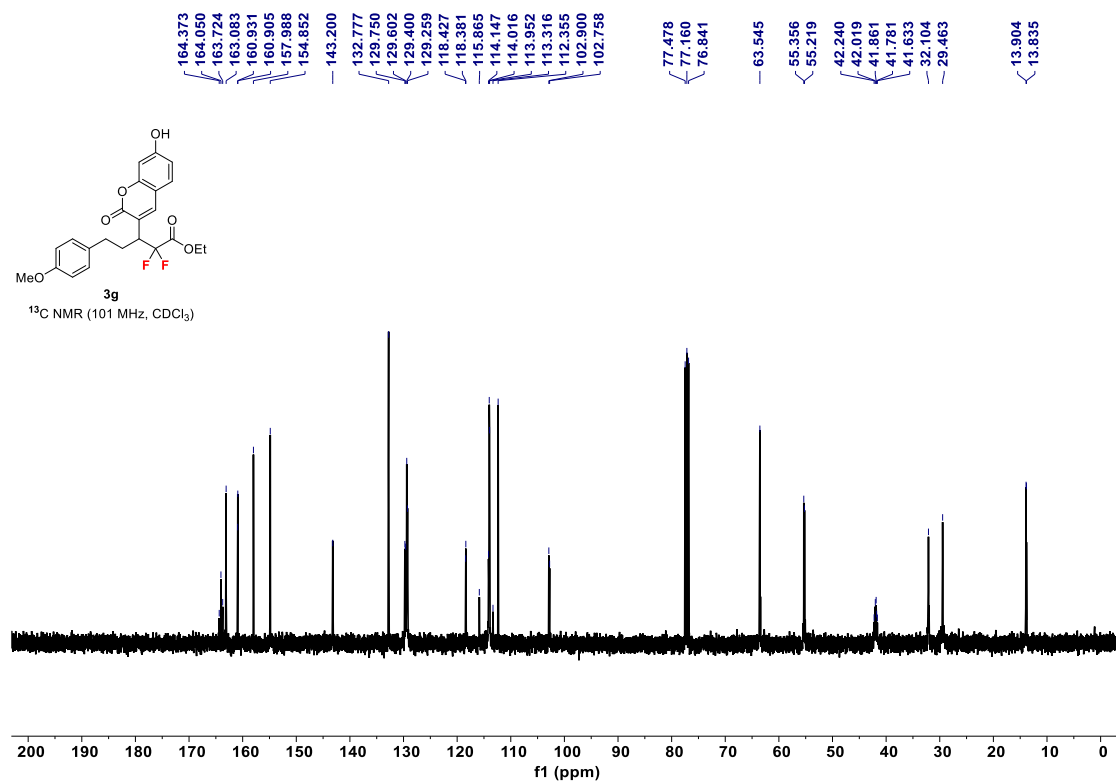

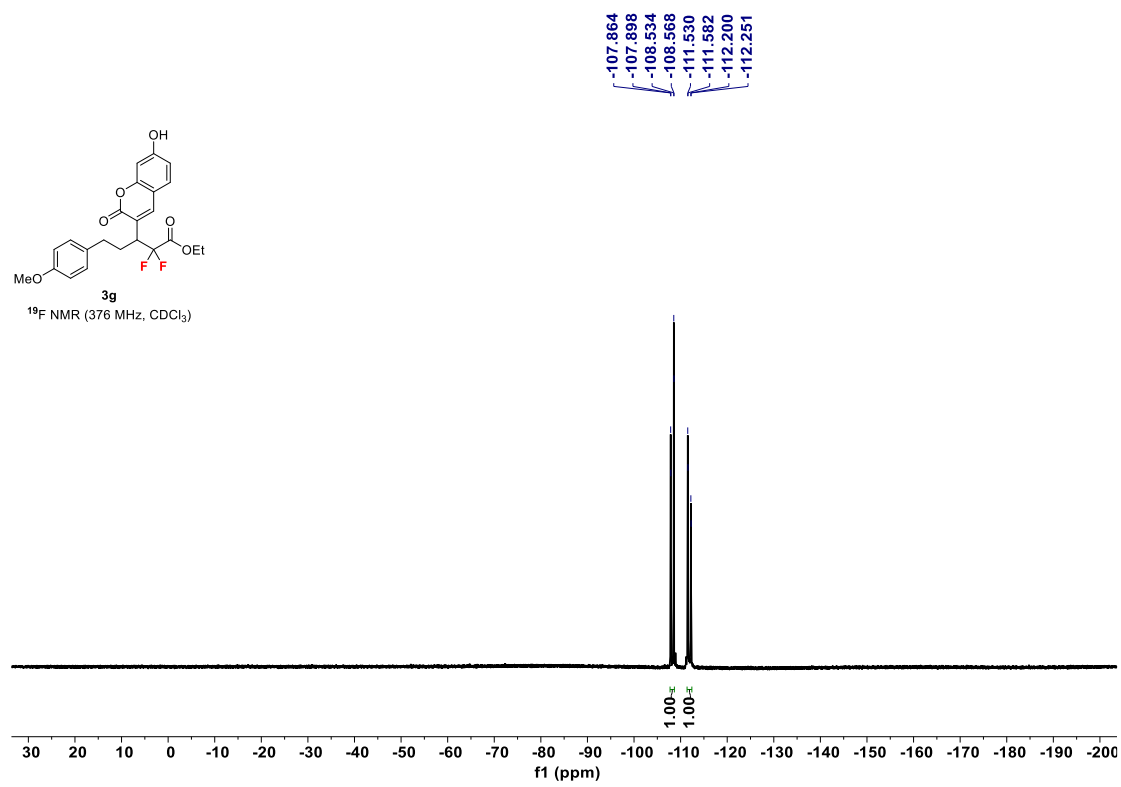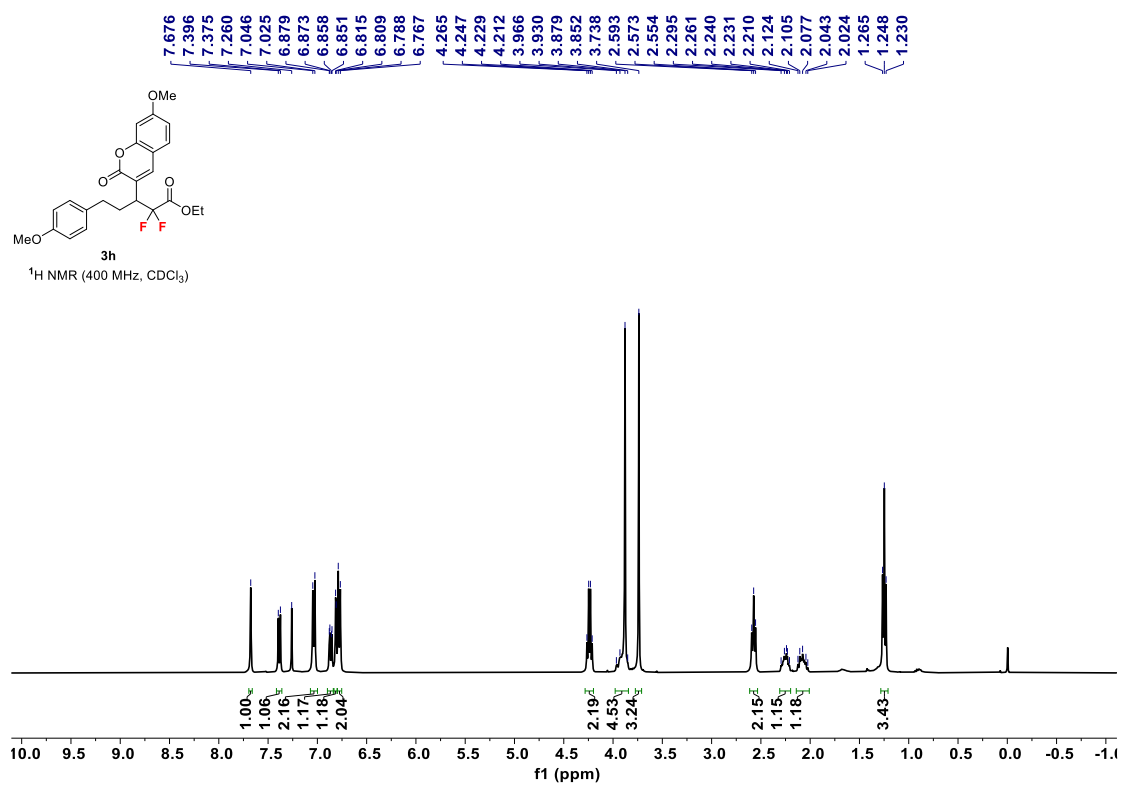

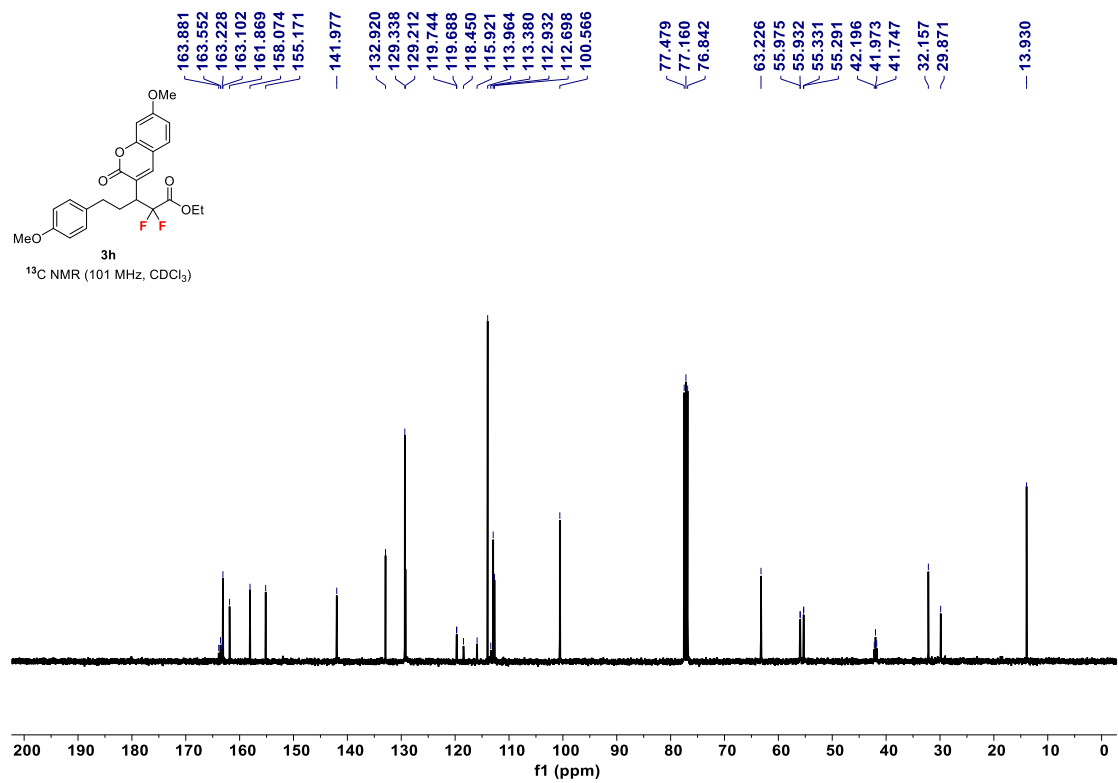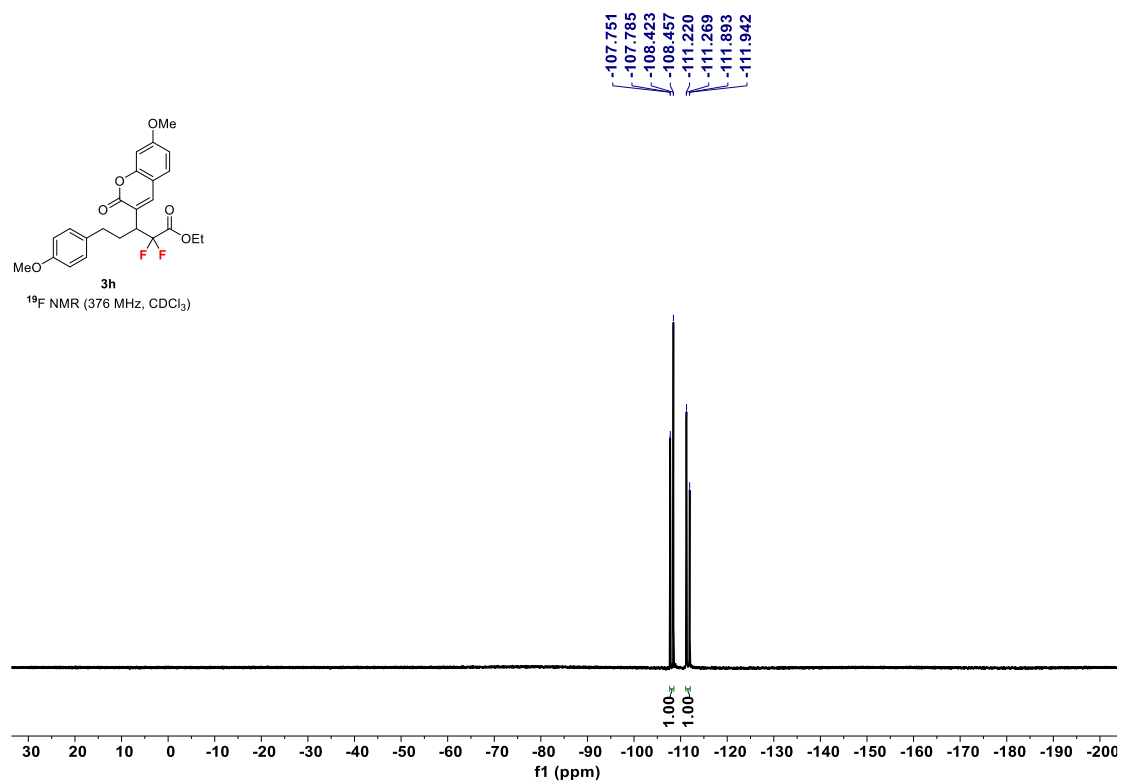

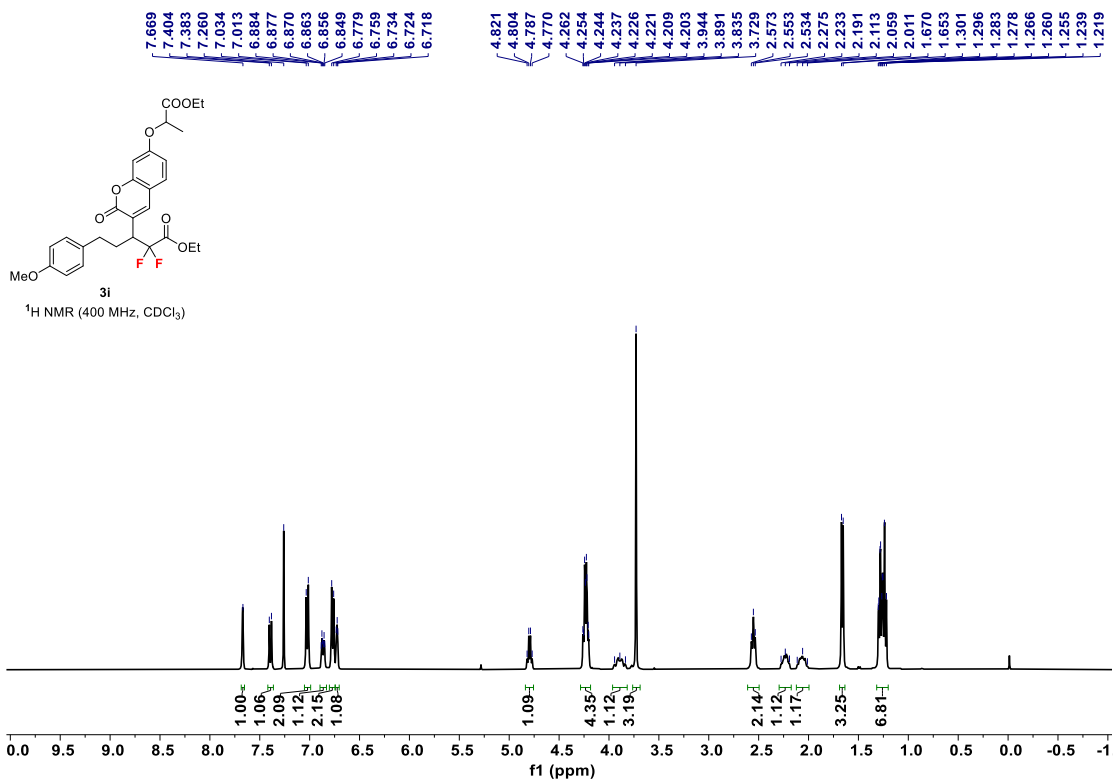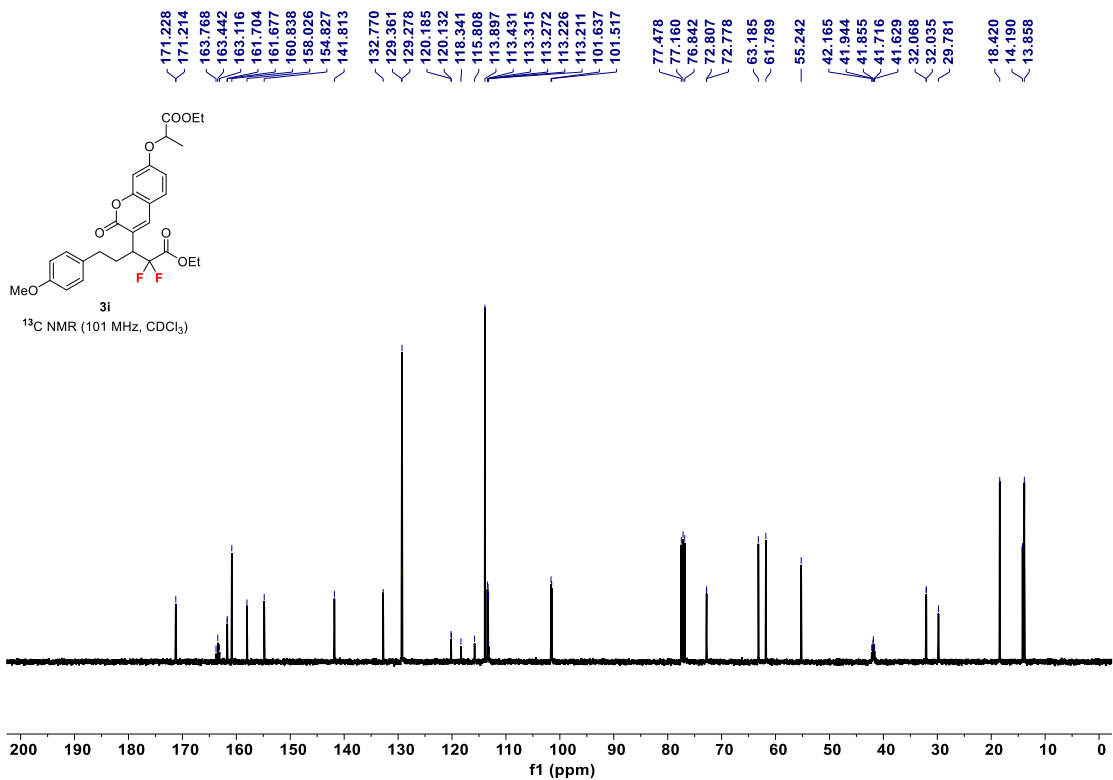



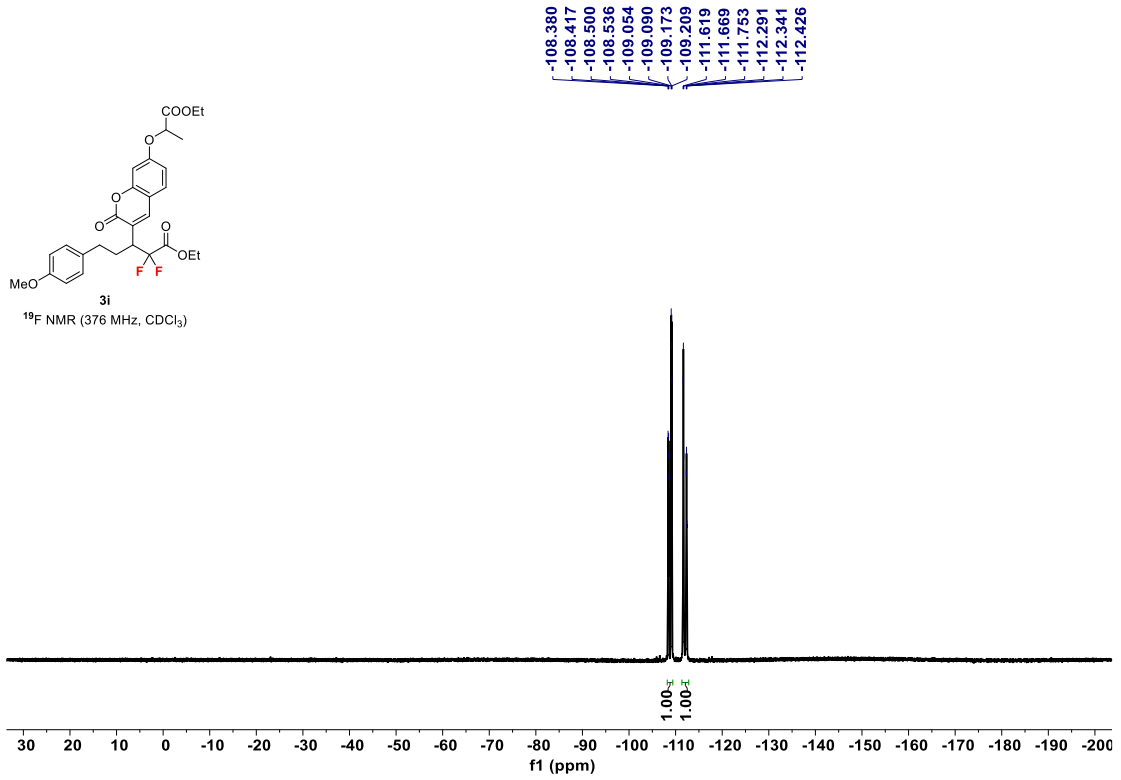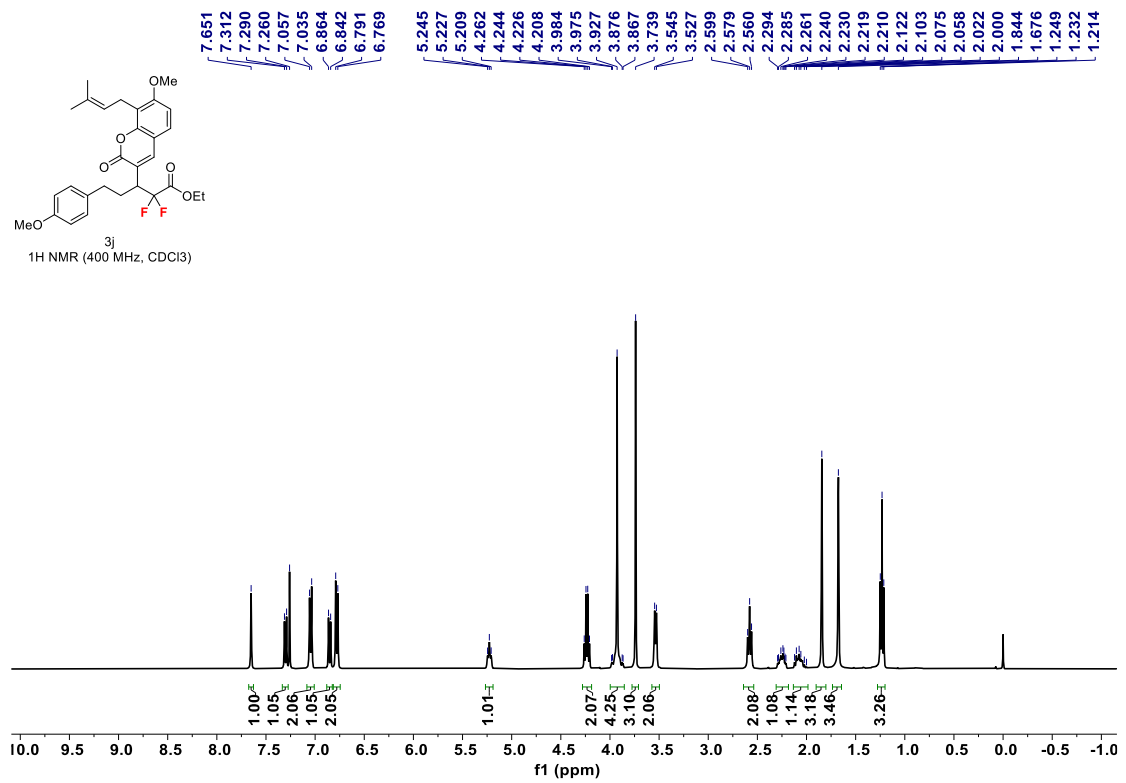

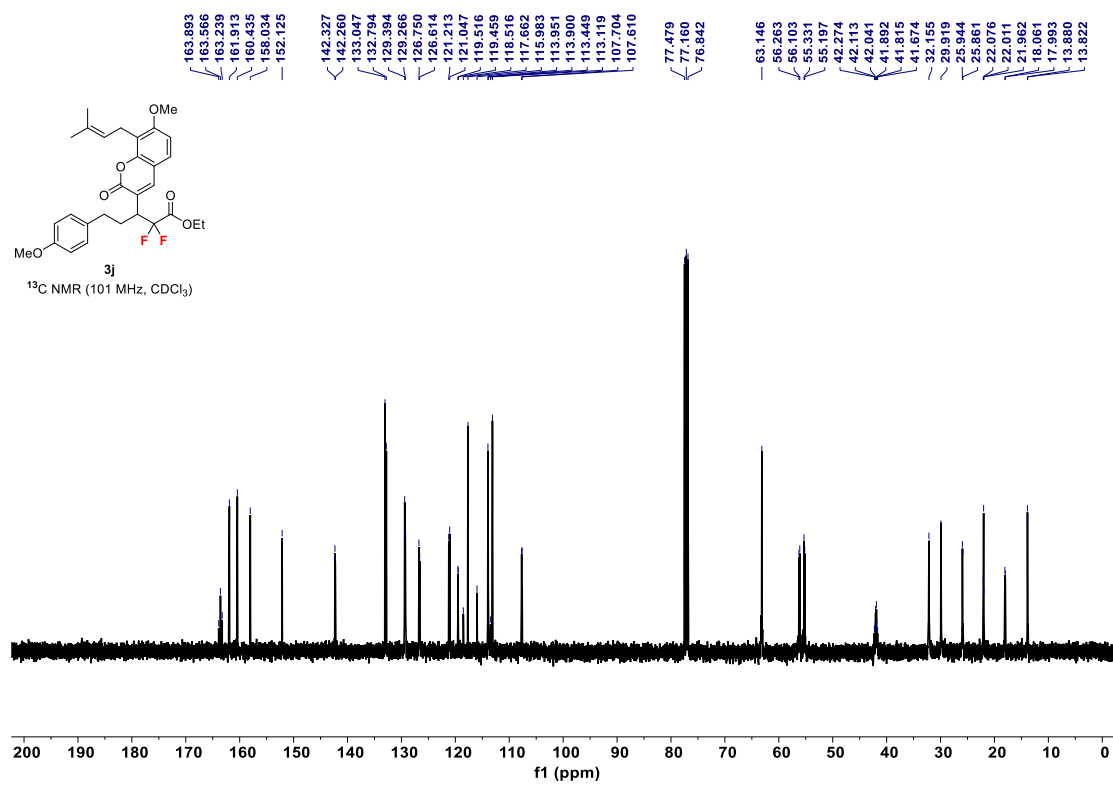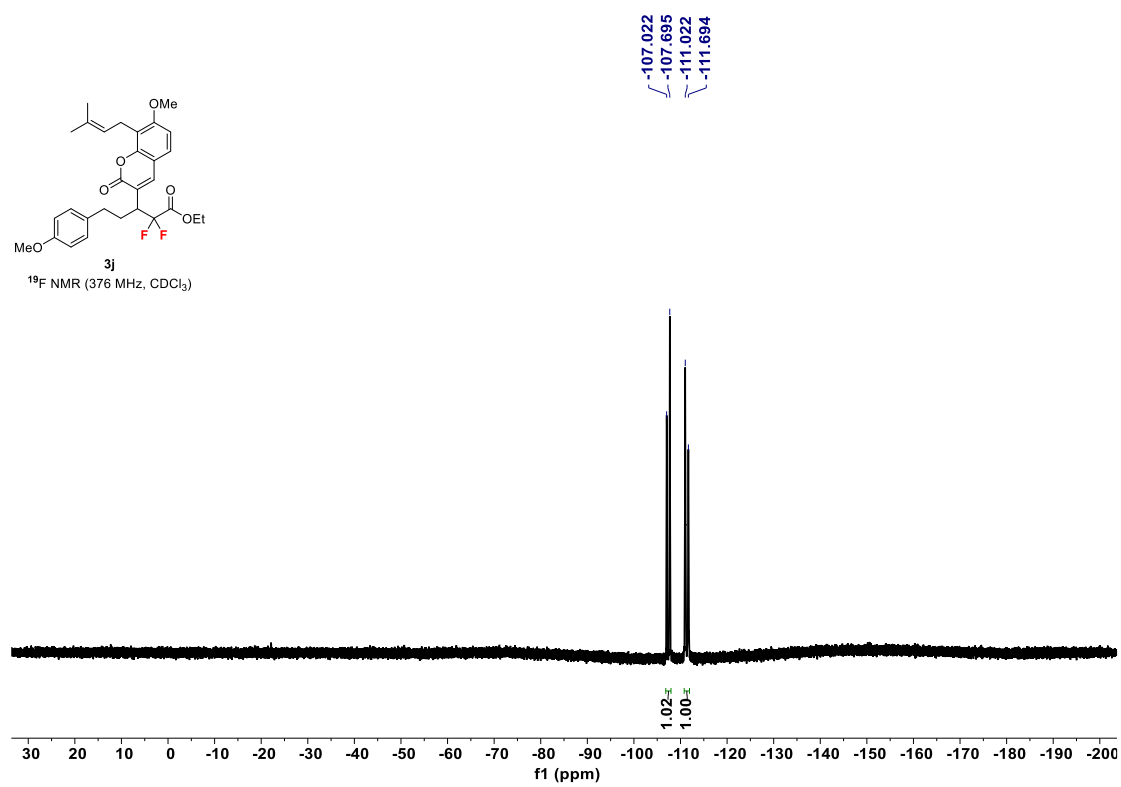

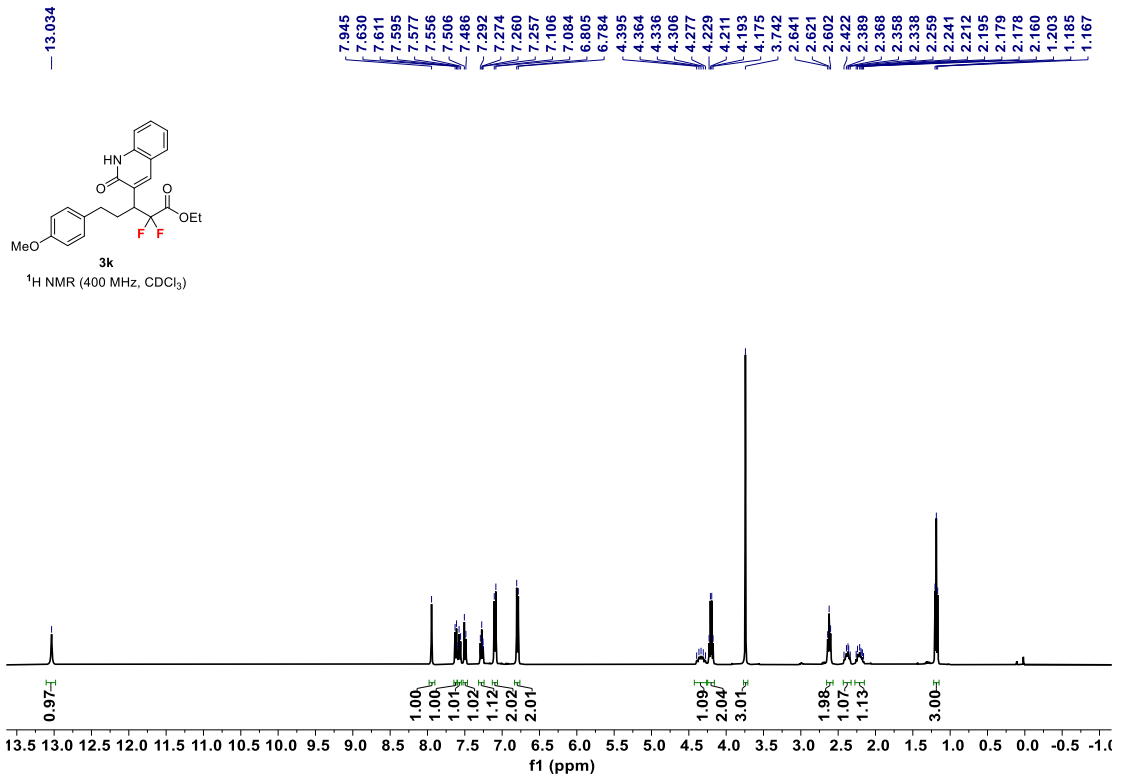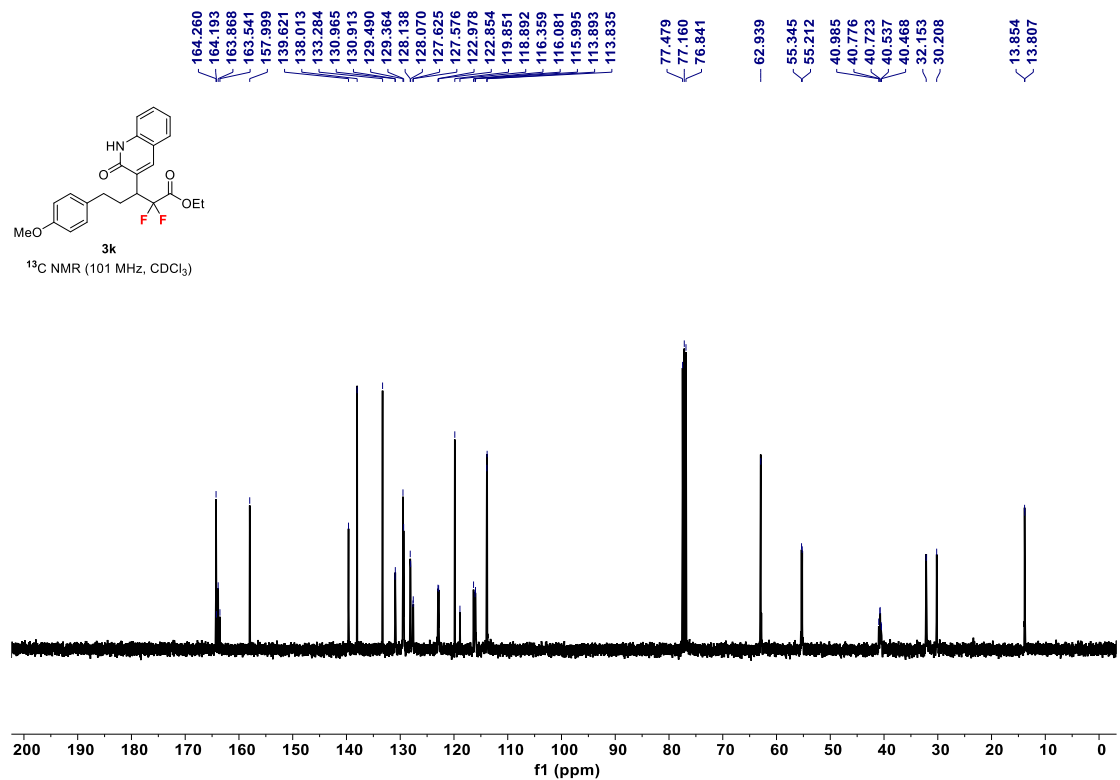

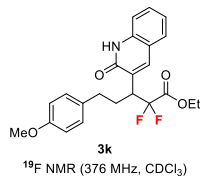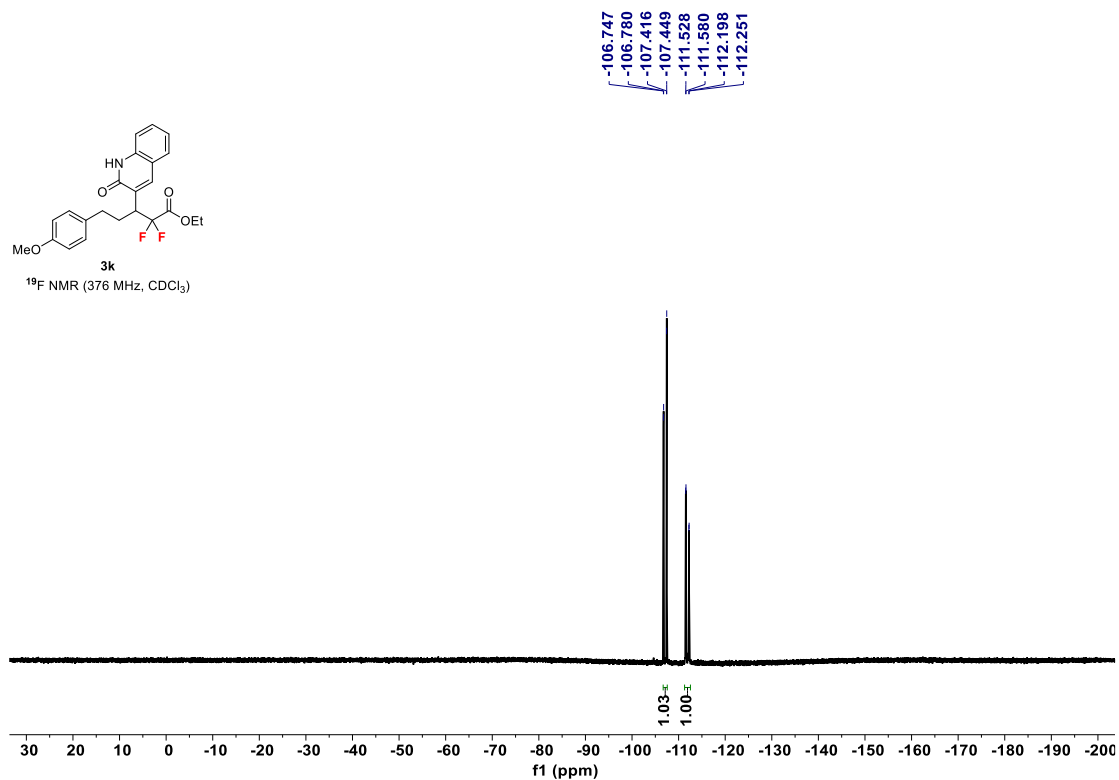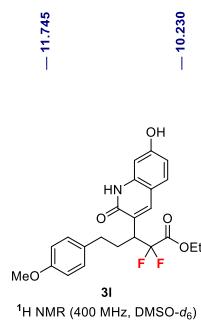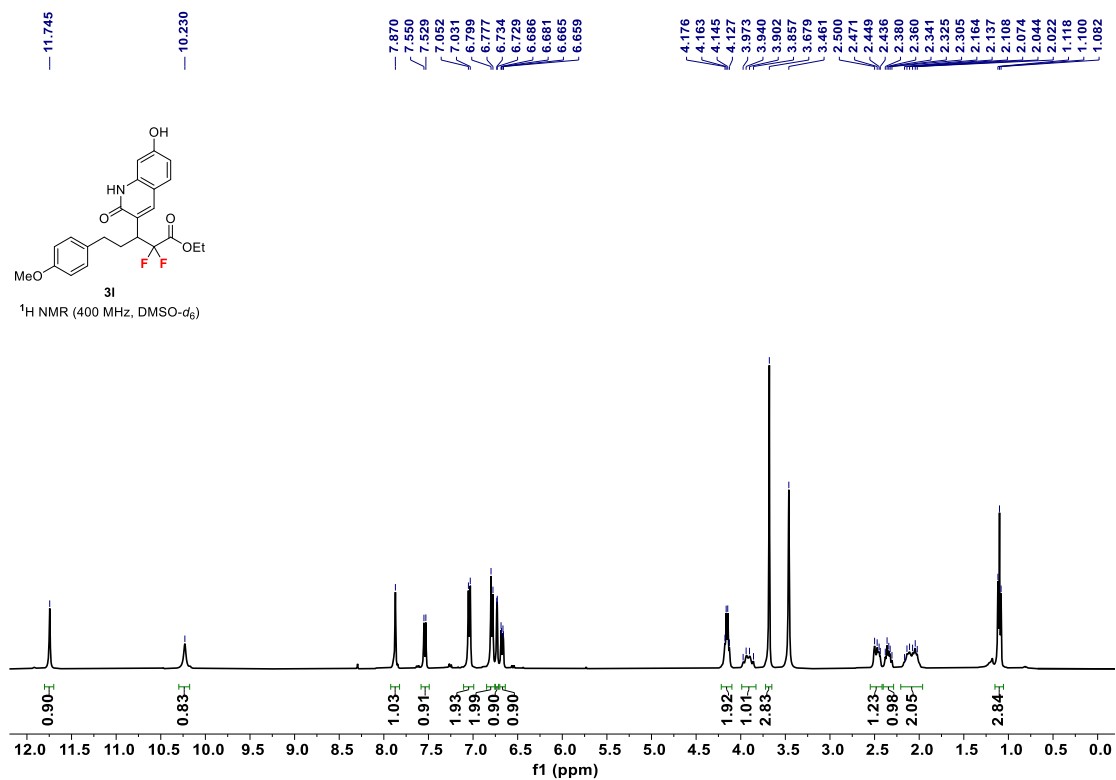

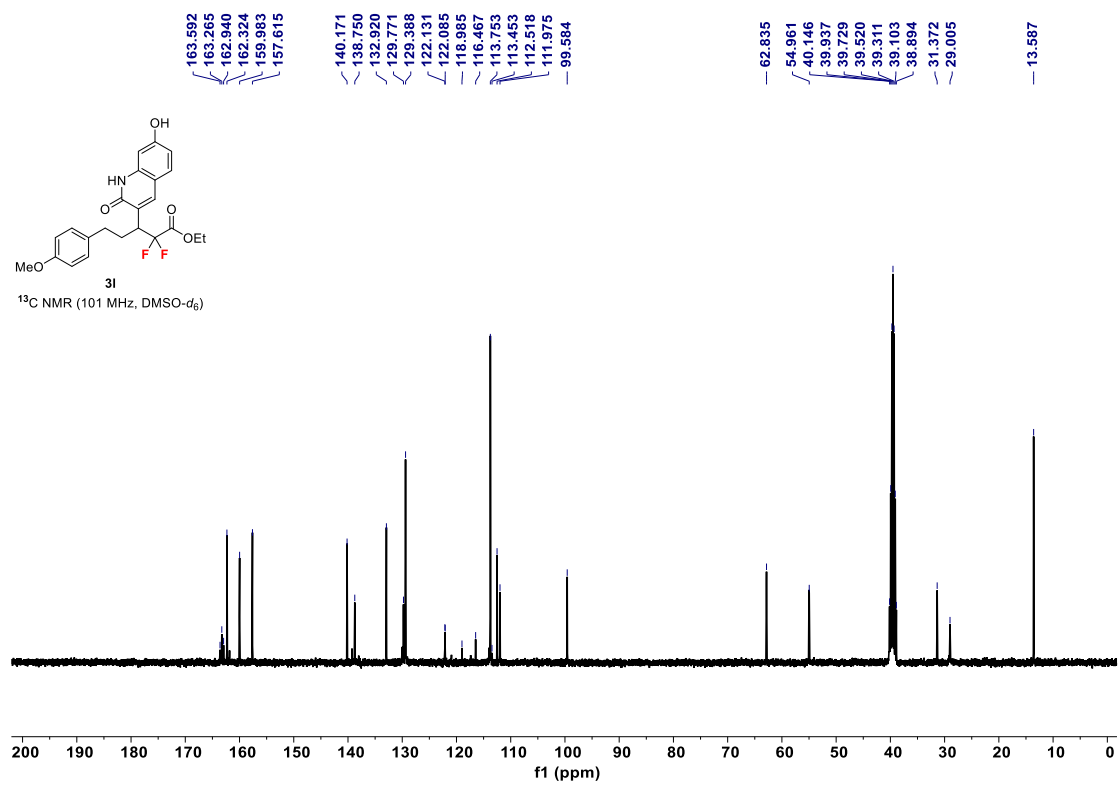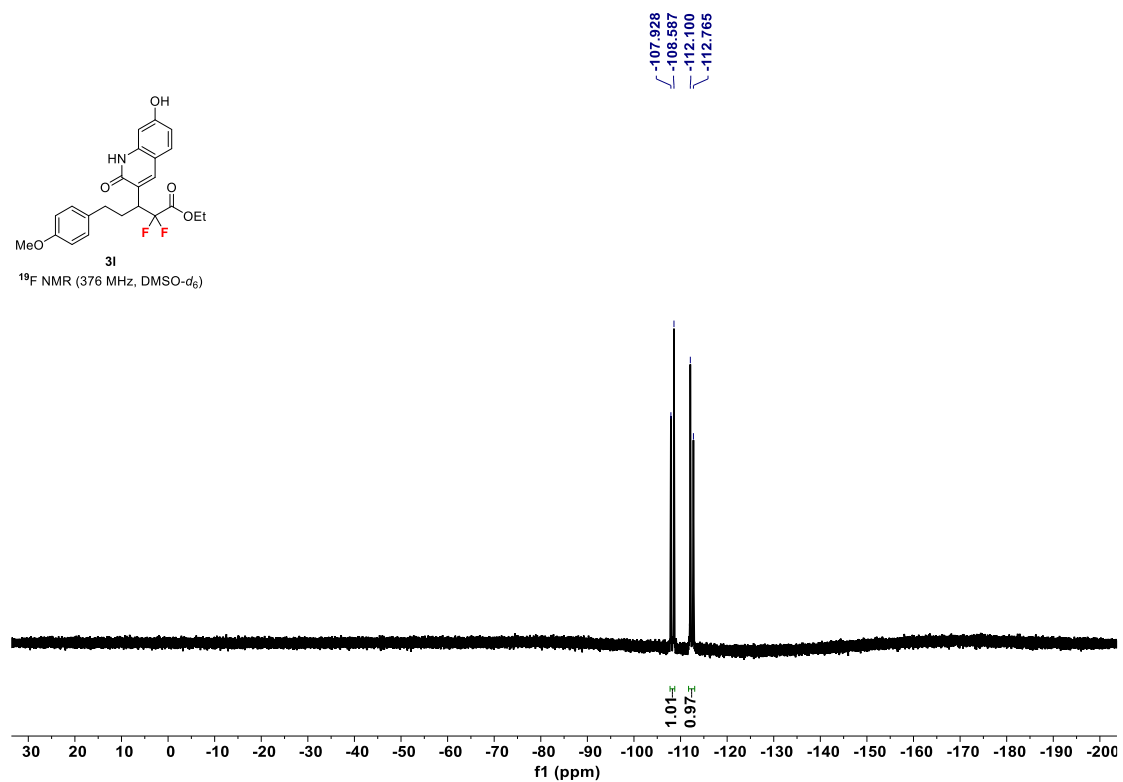

— 13.213

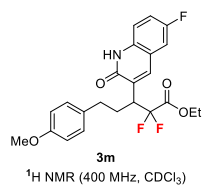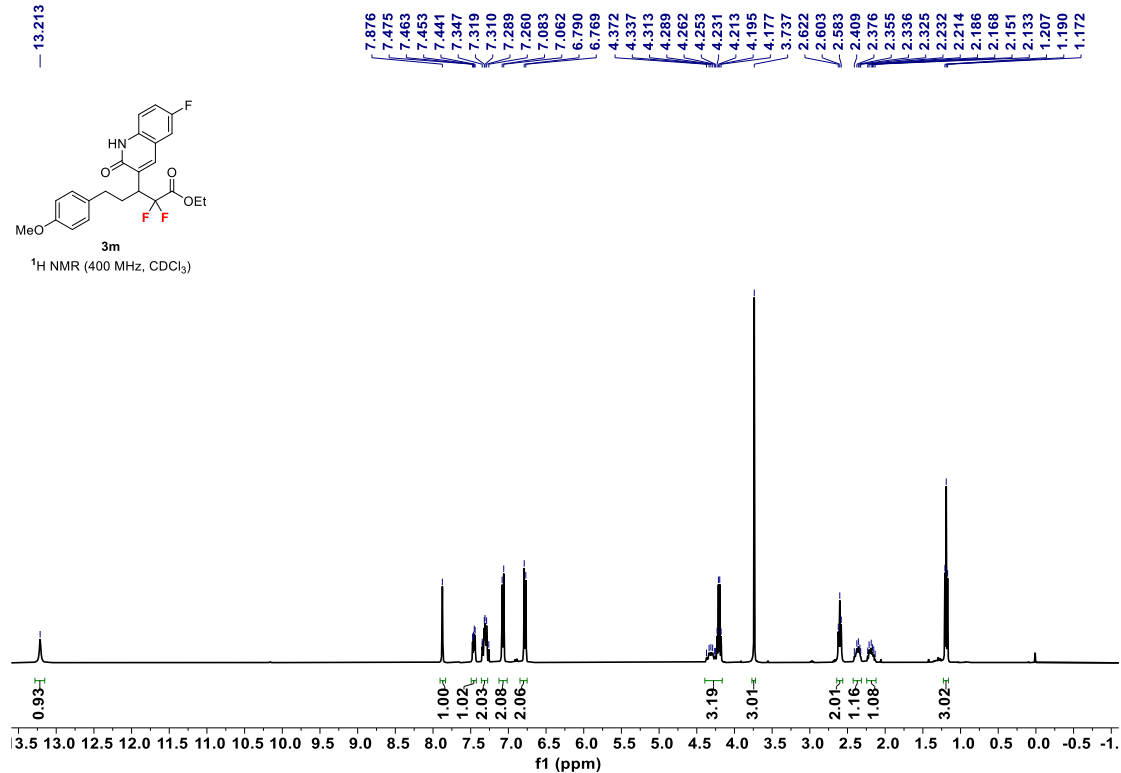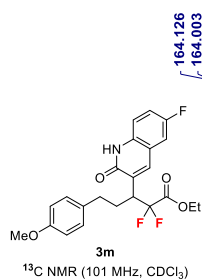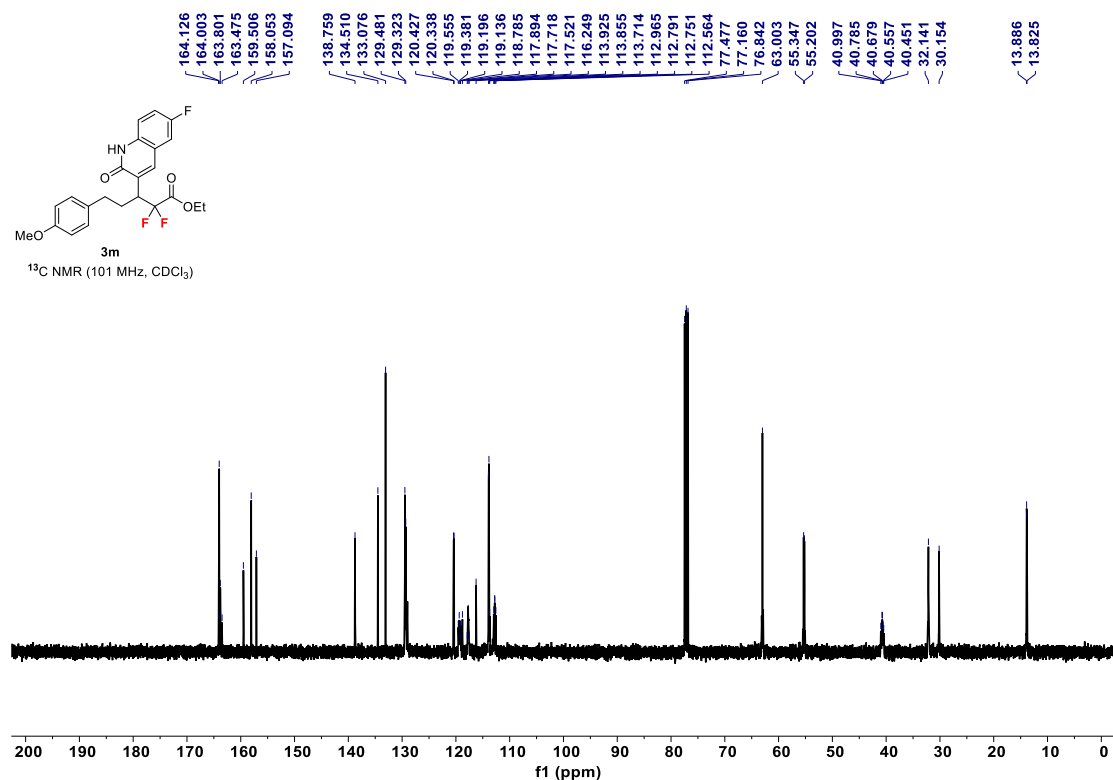

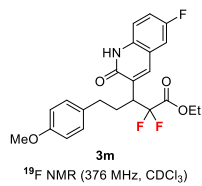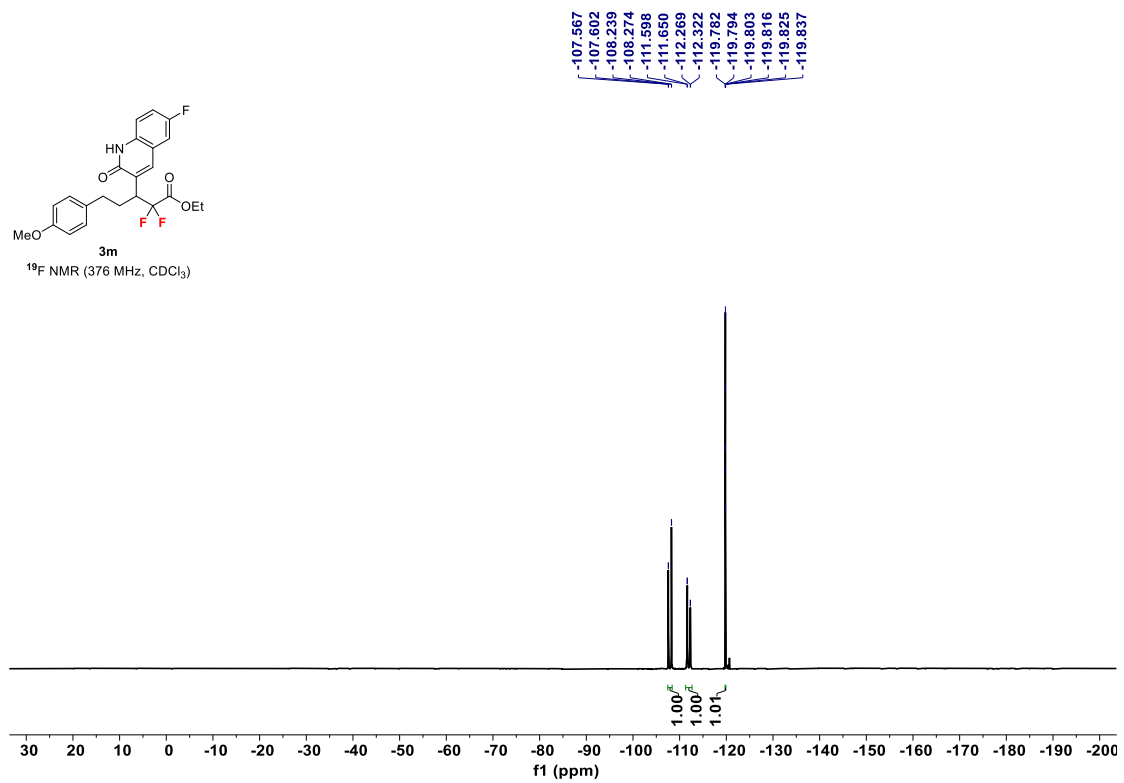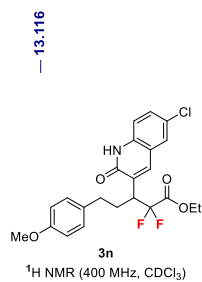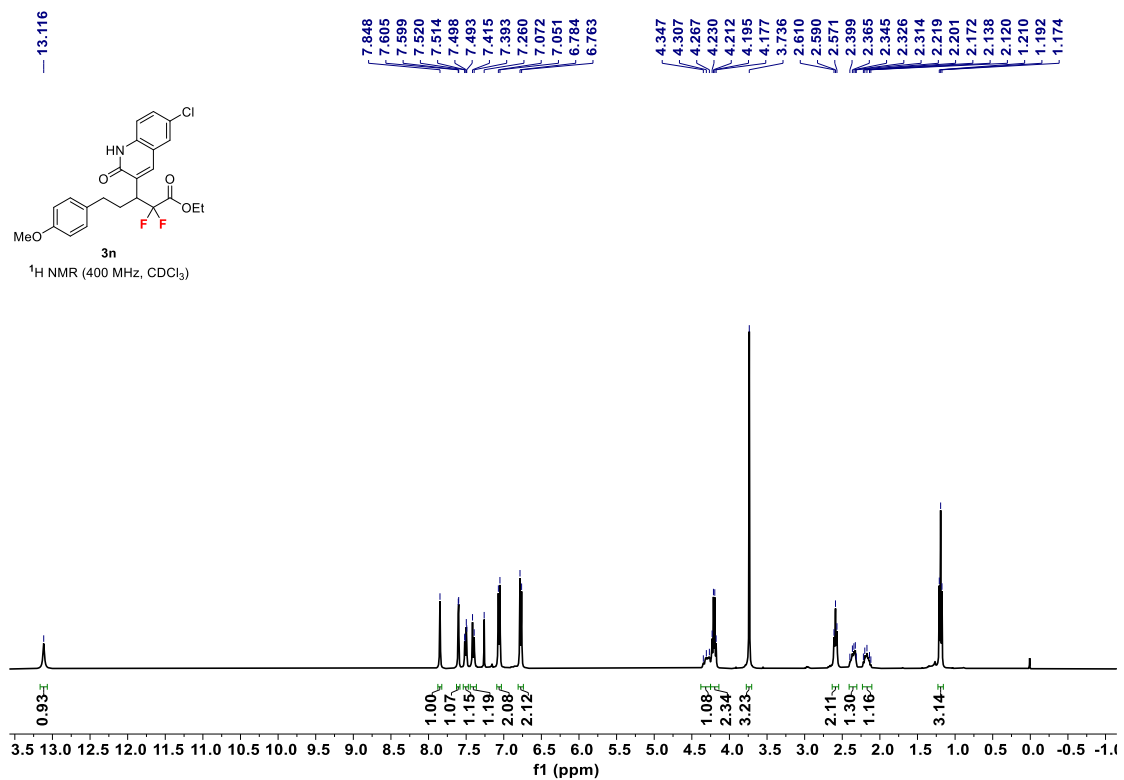

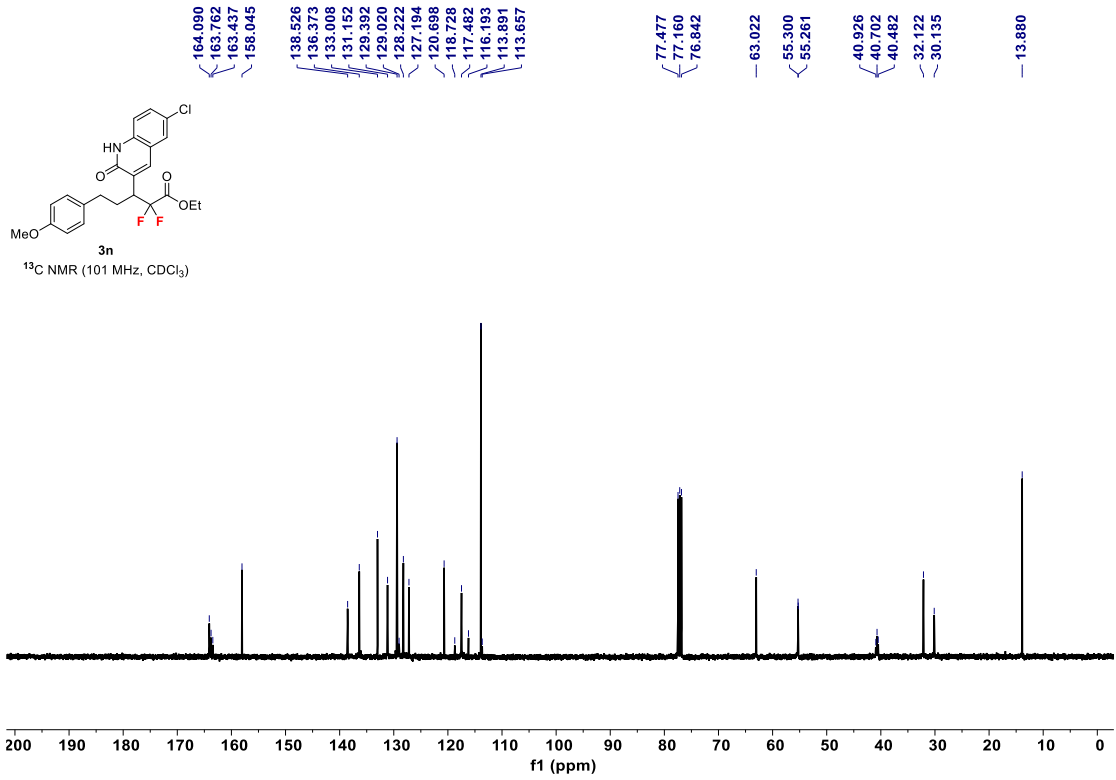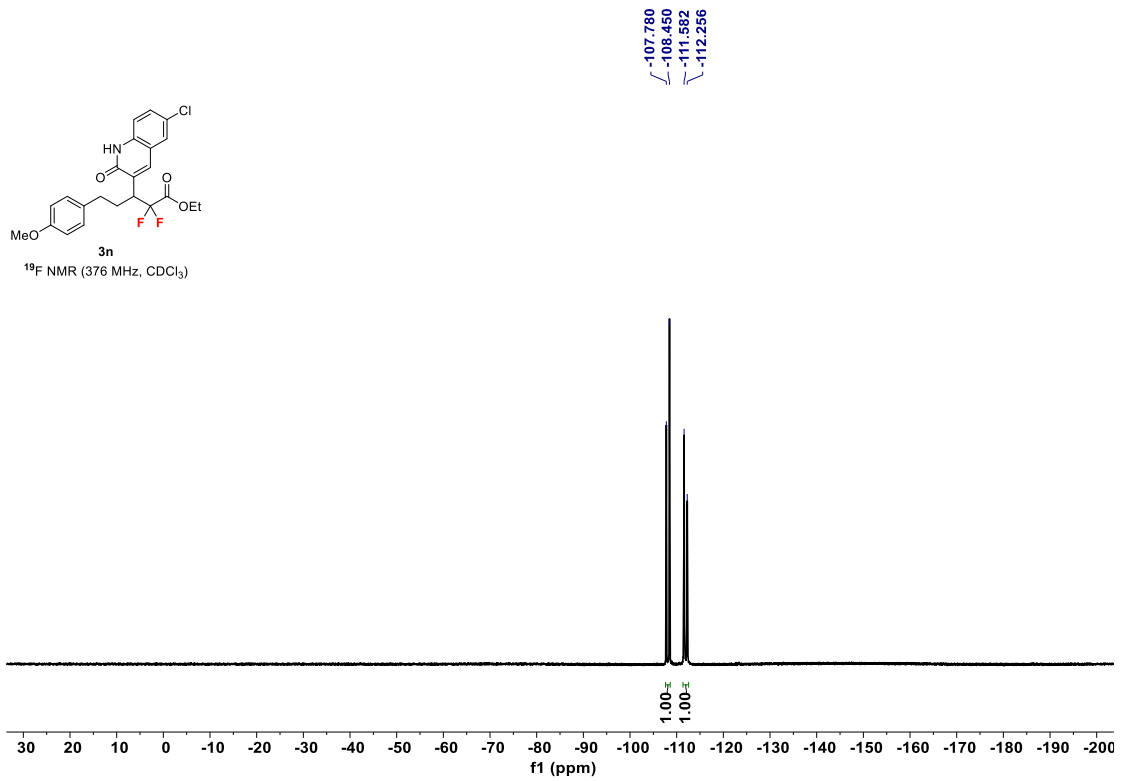



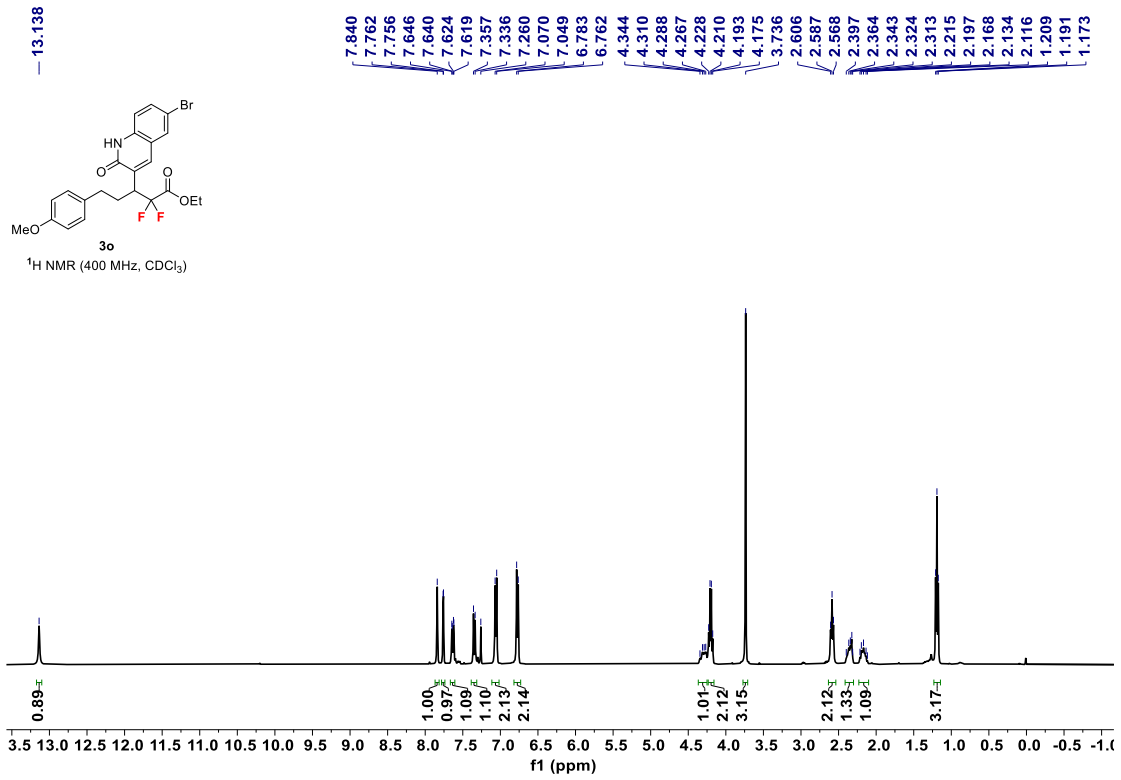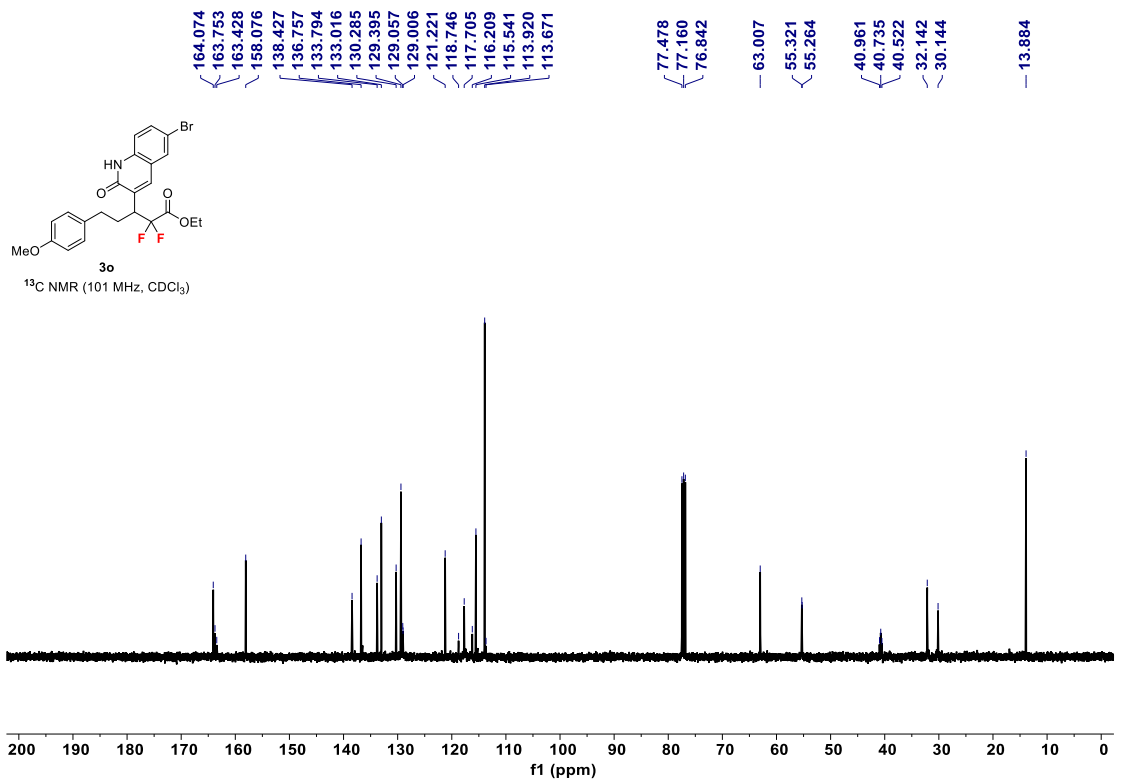

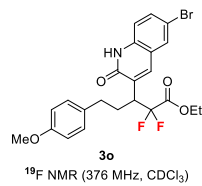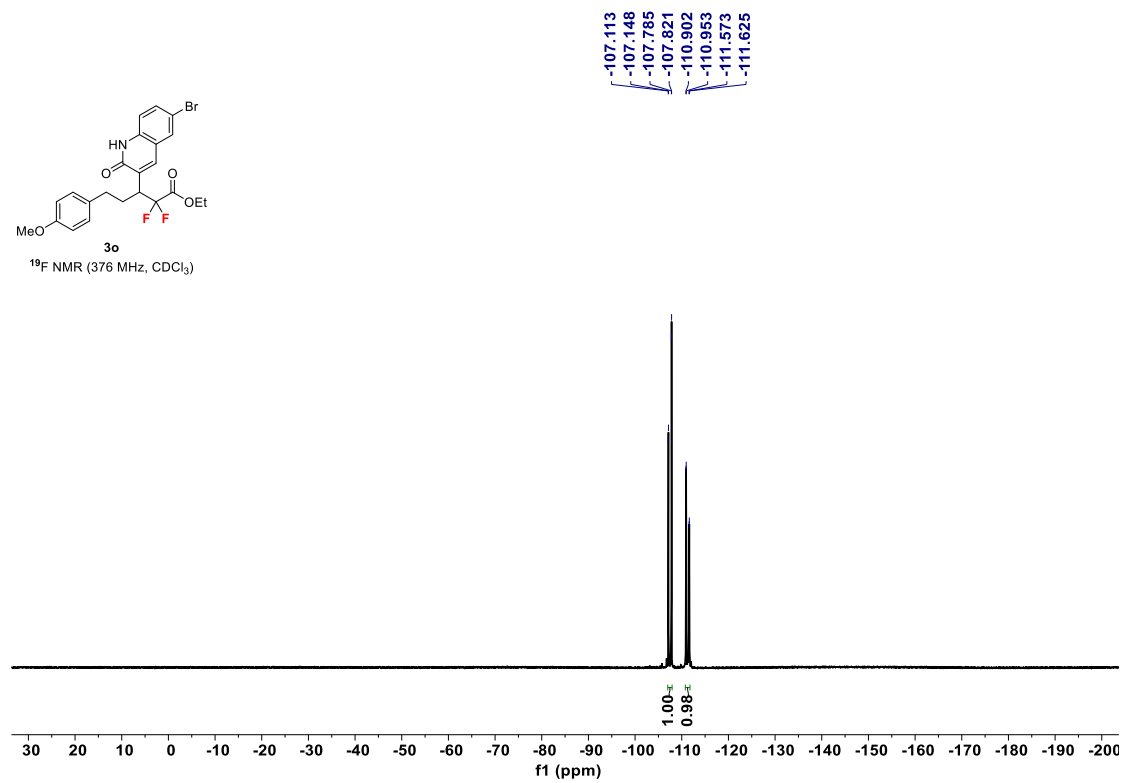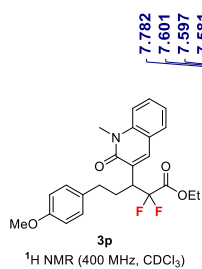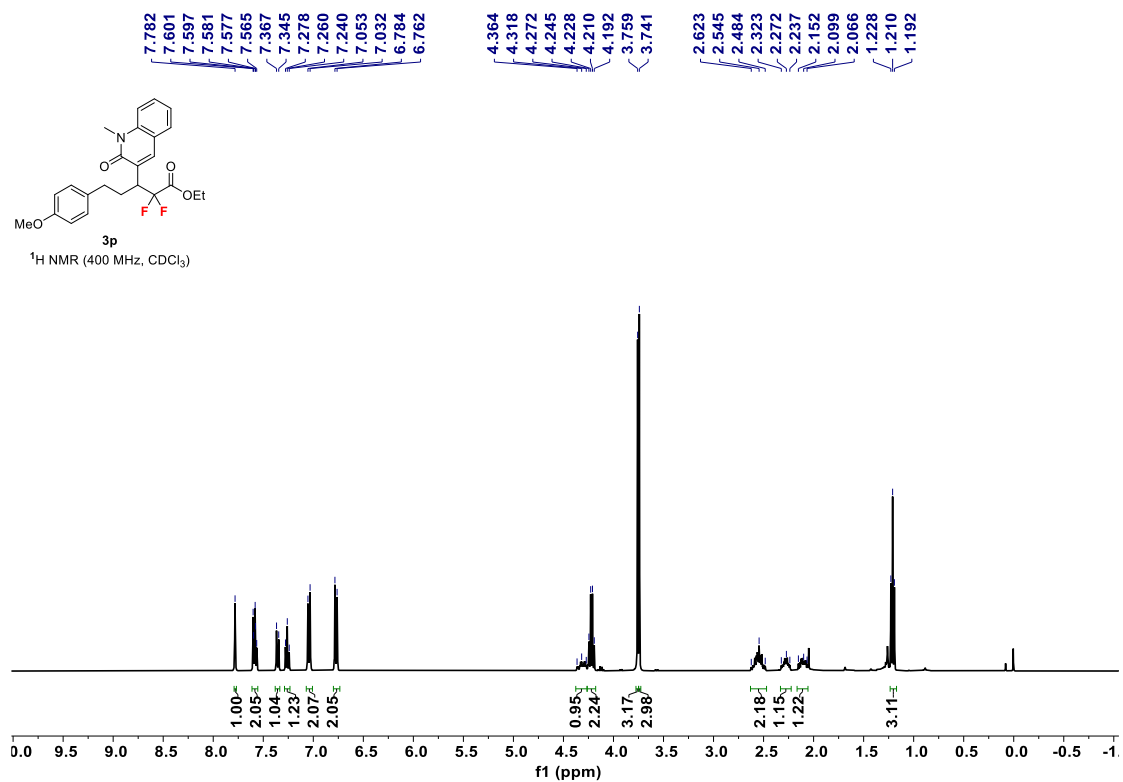

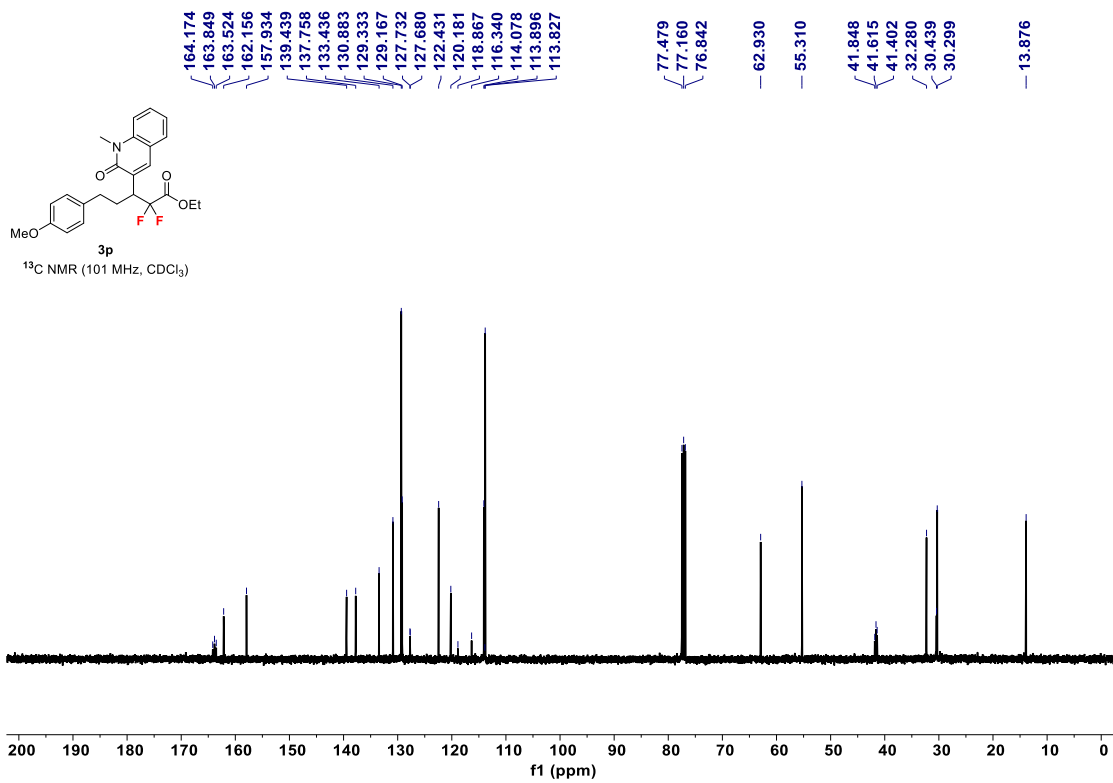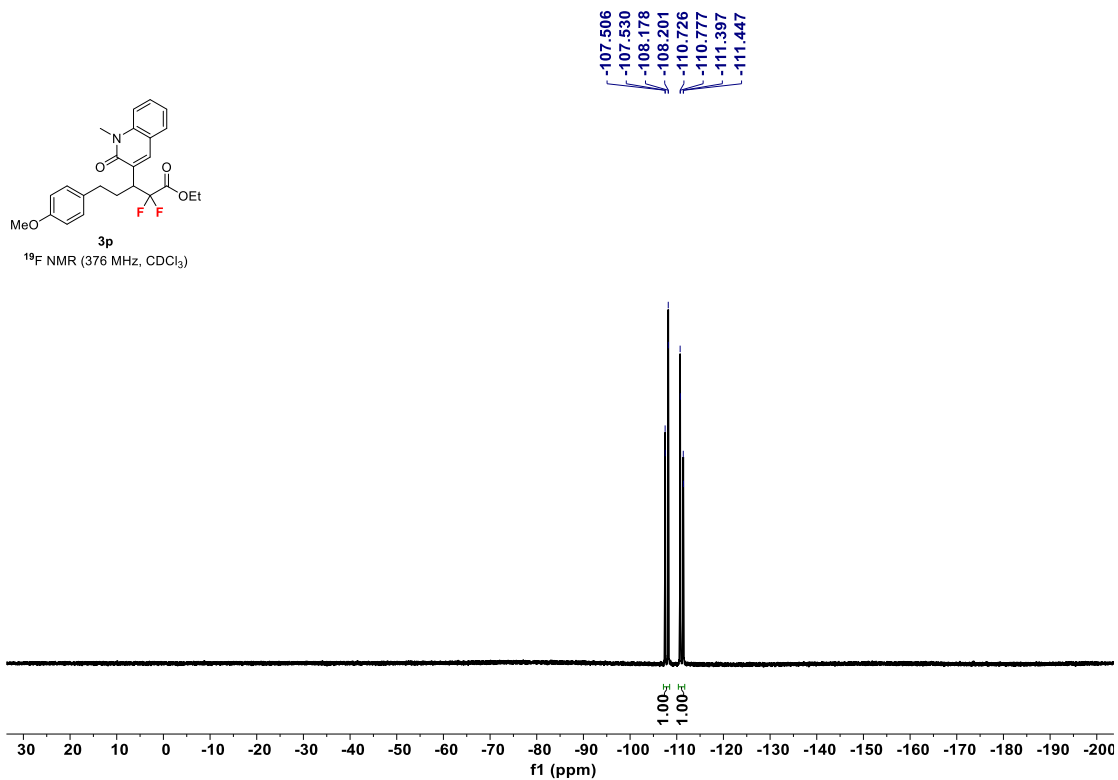

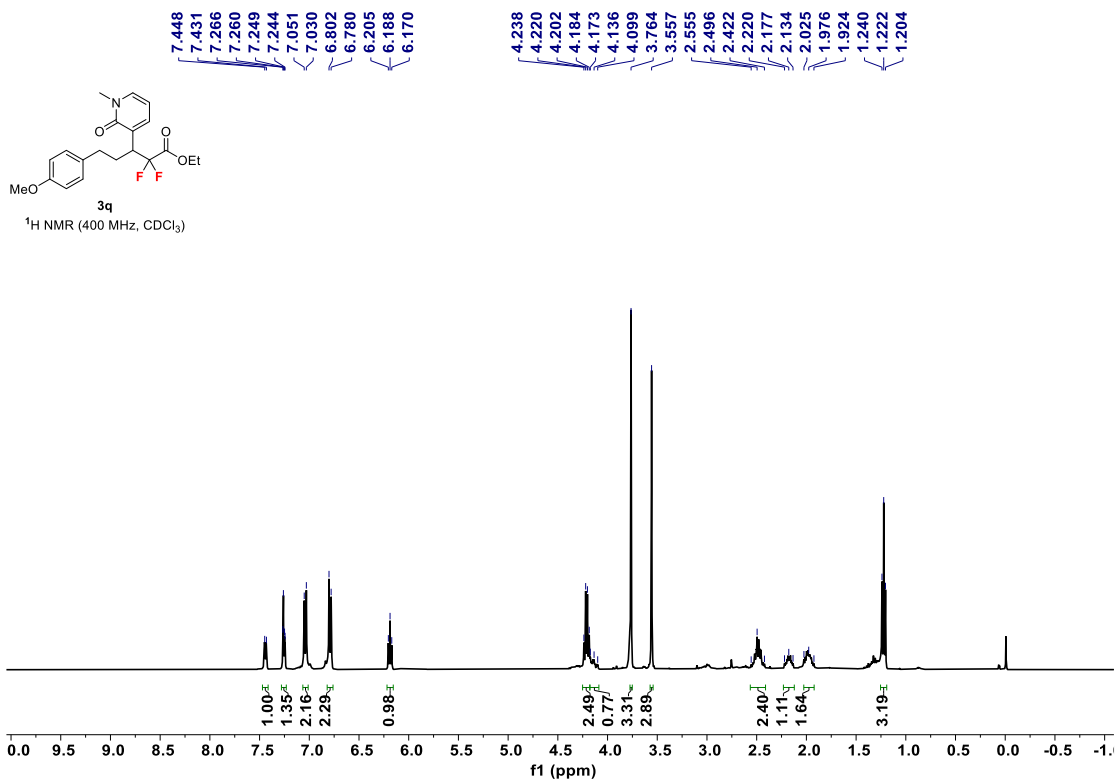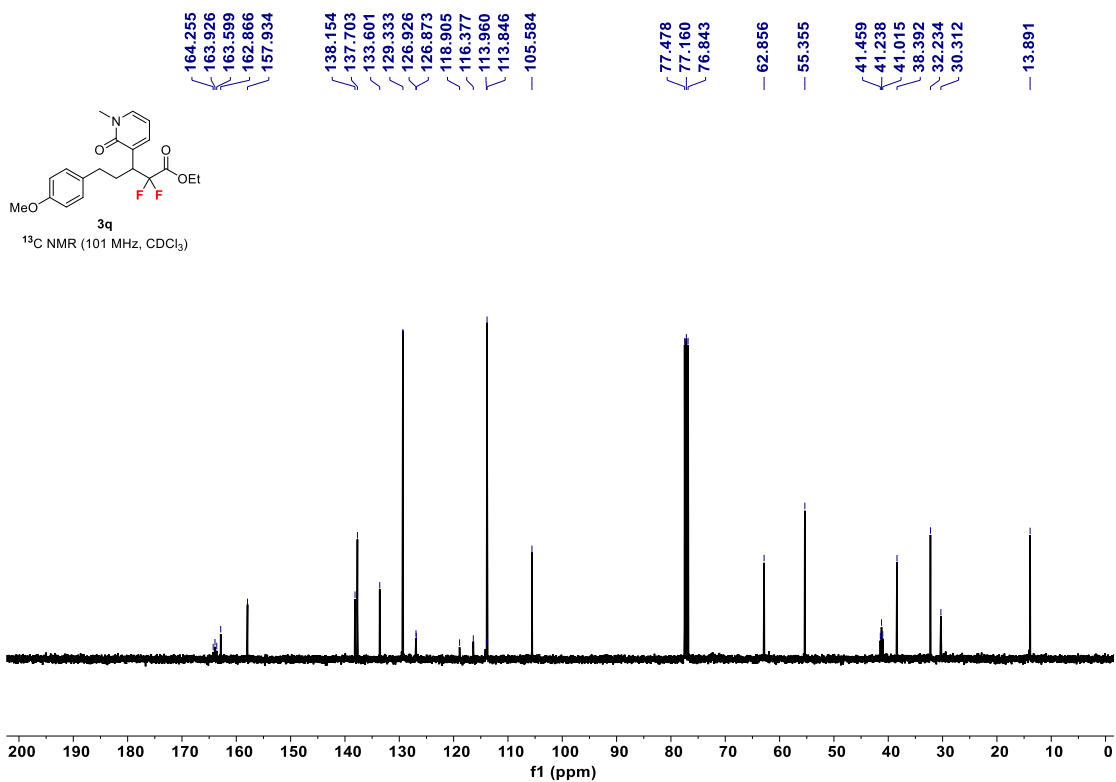

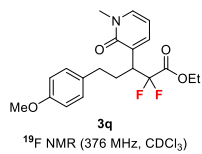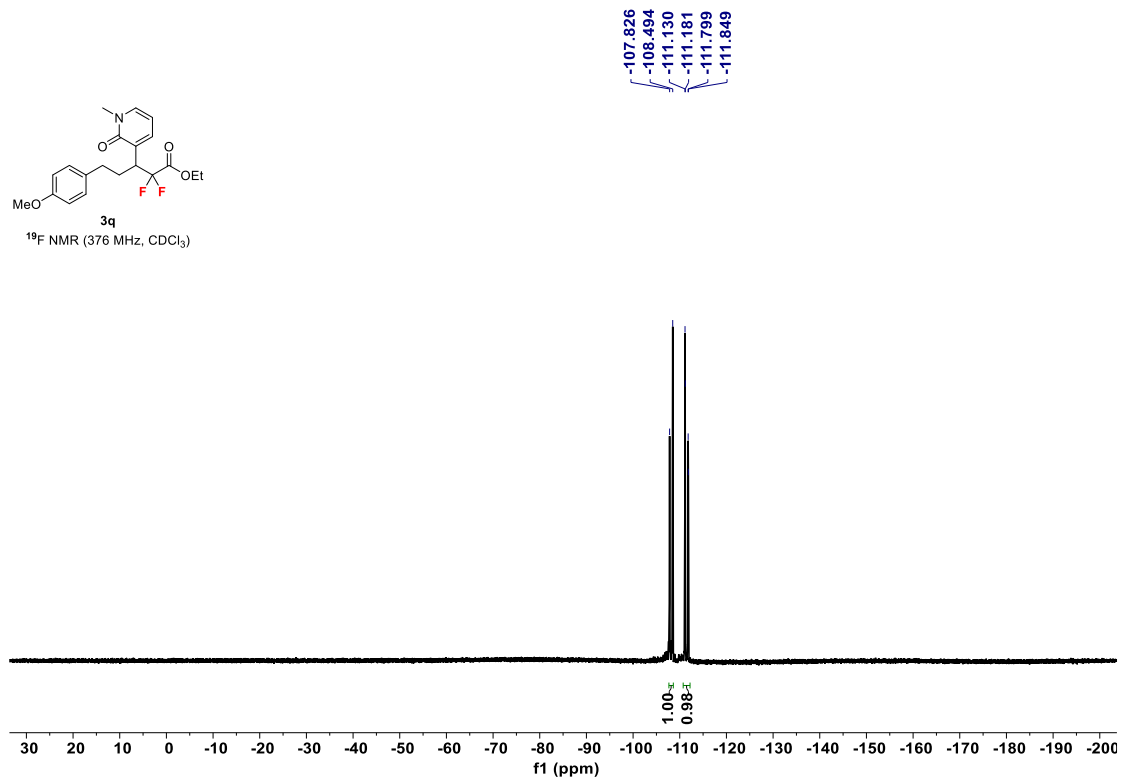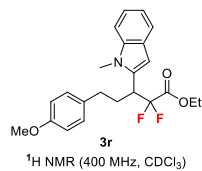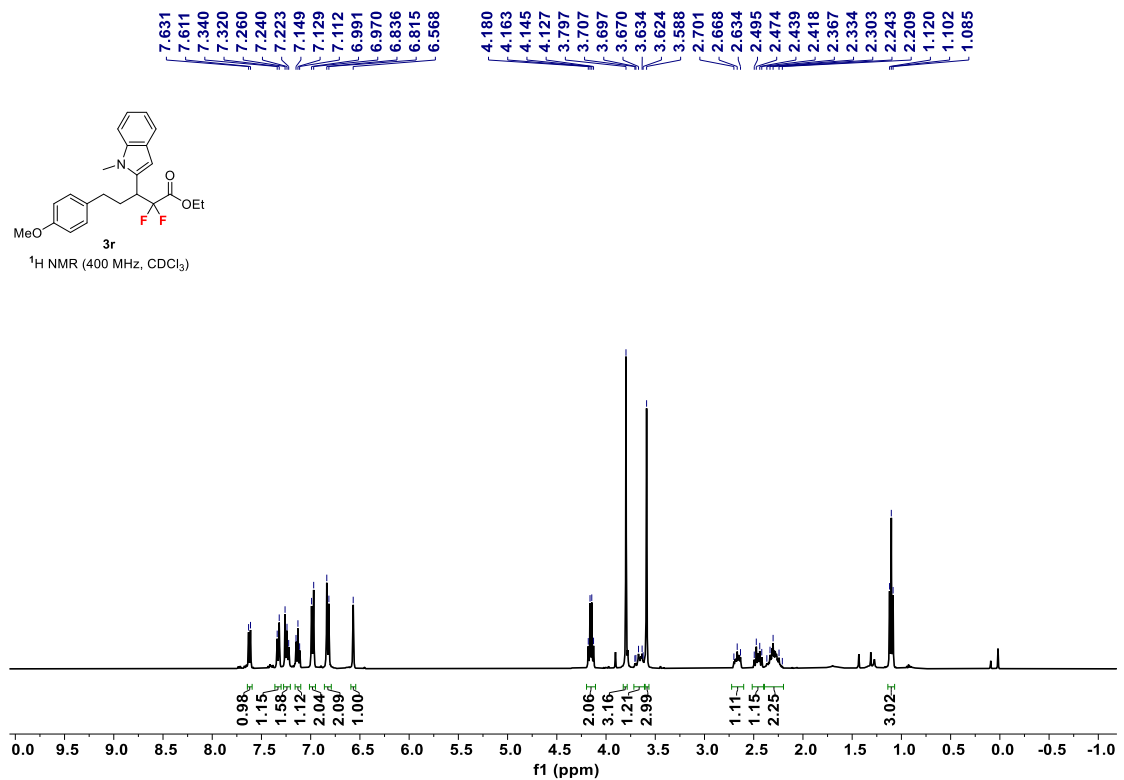

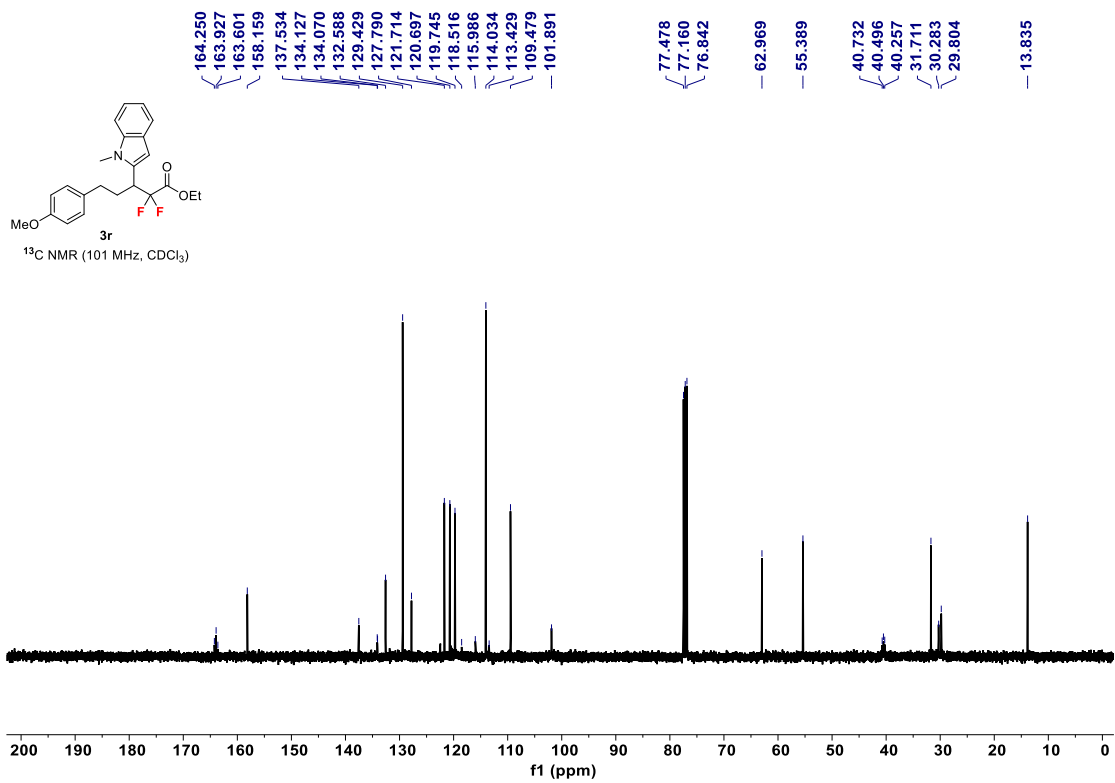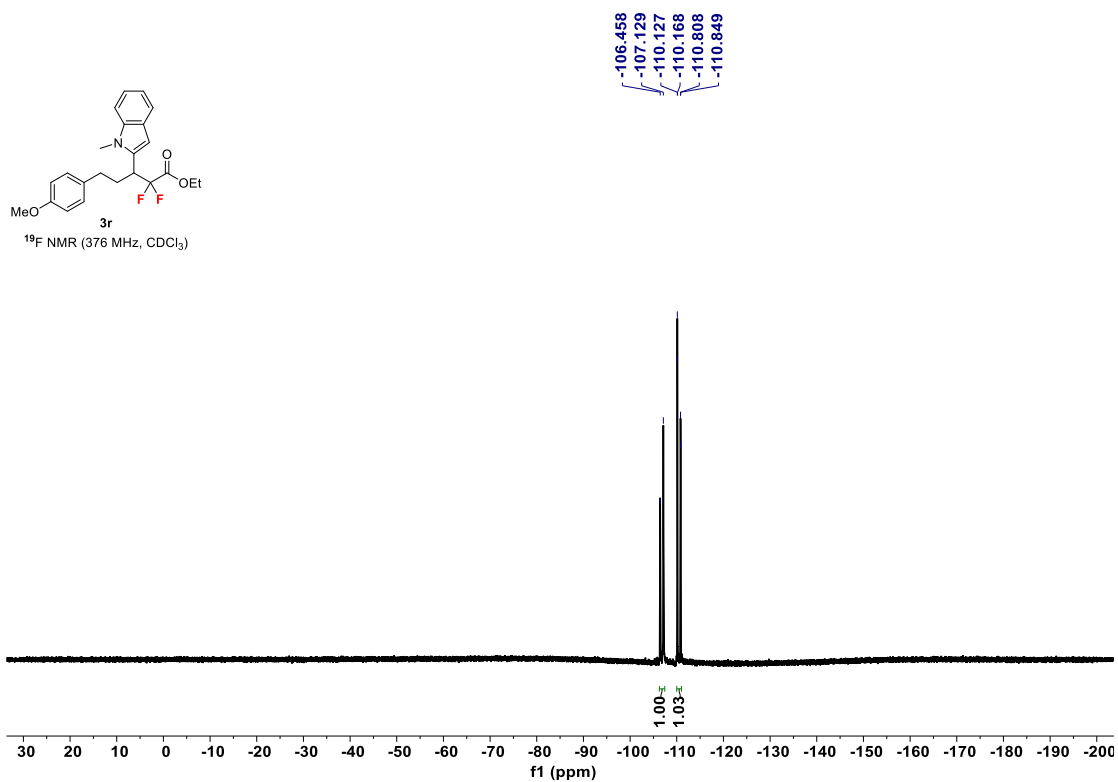

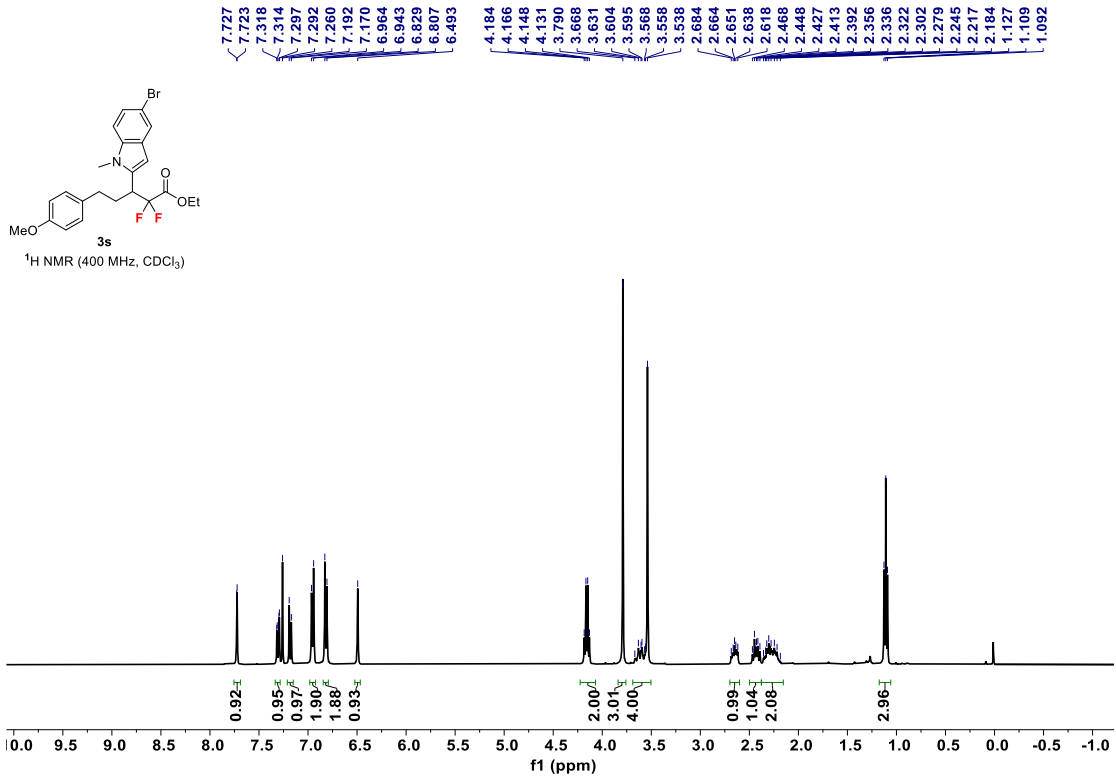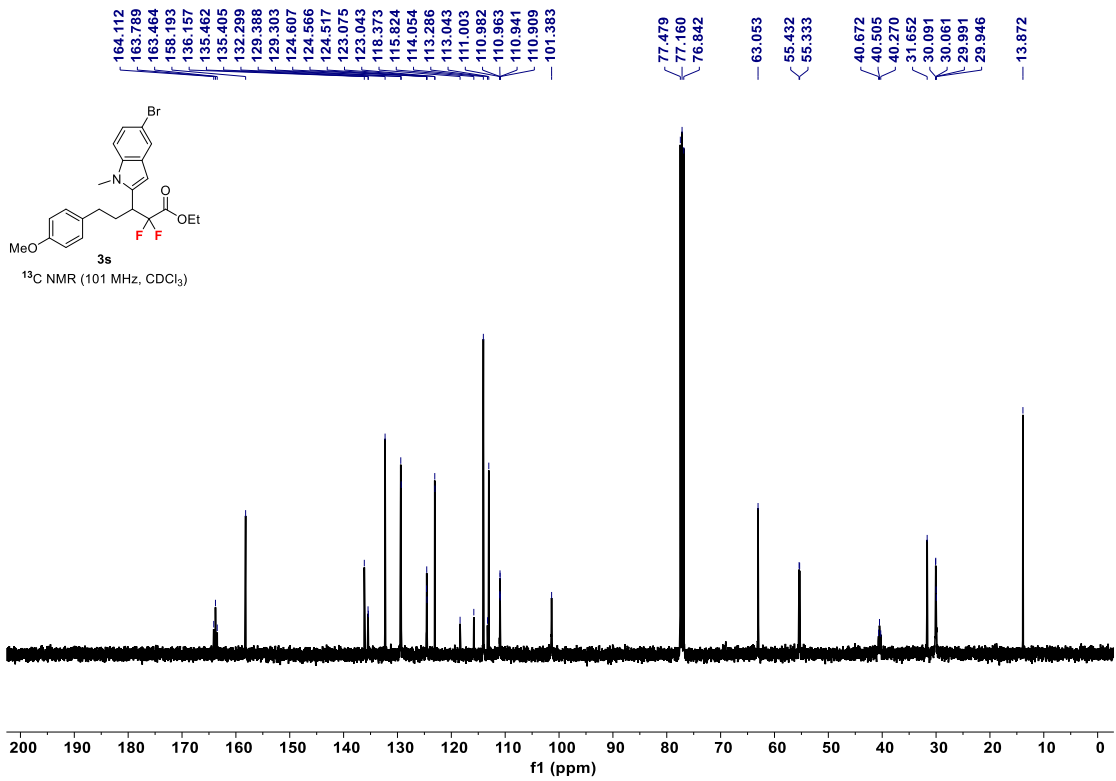

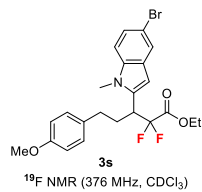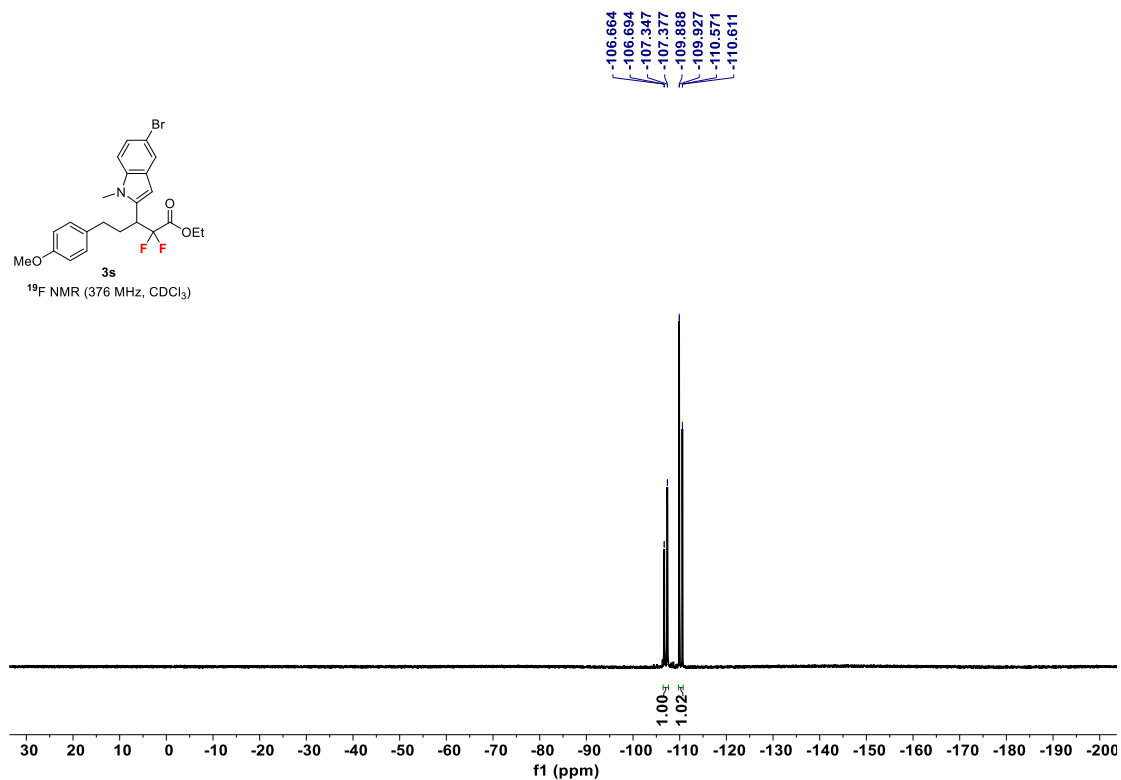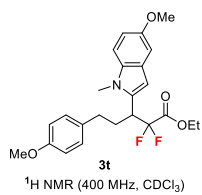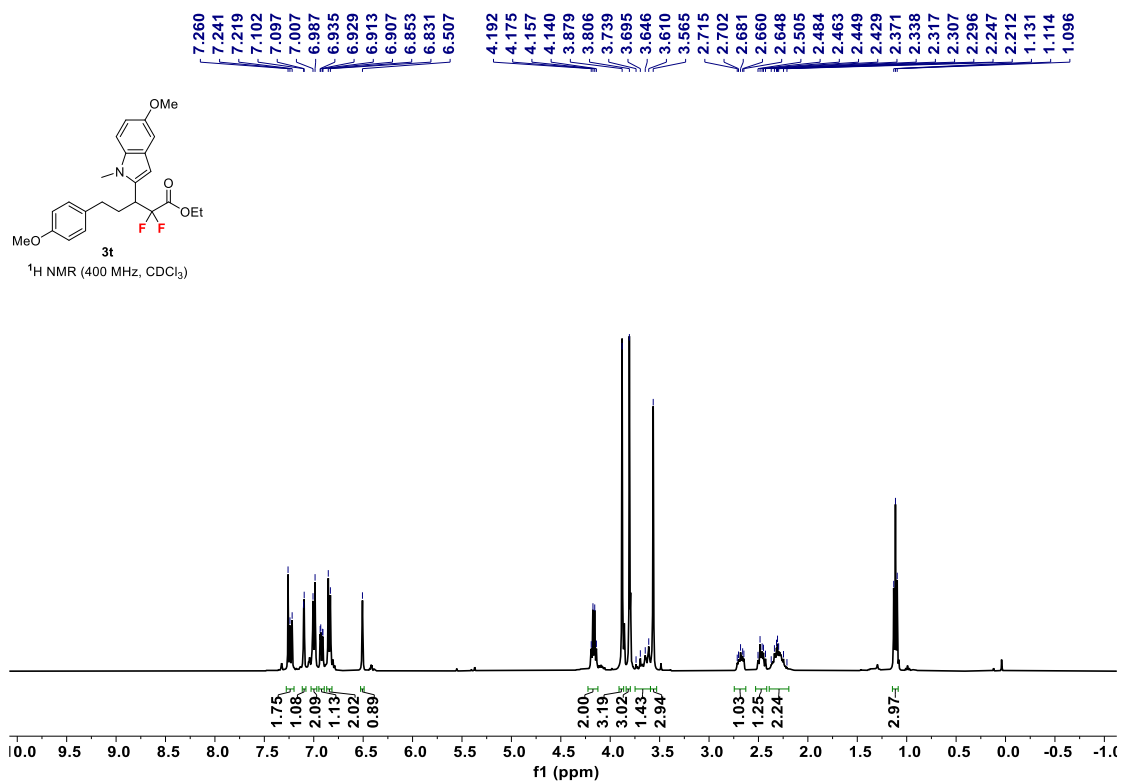



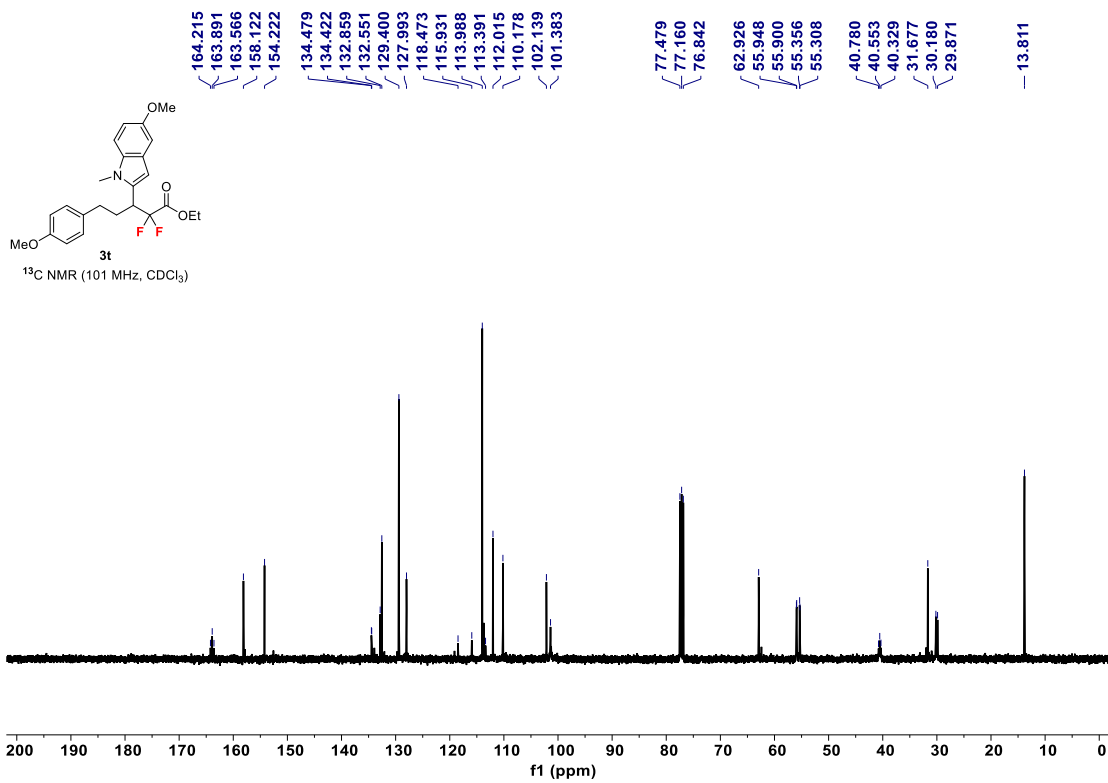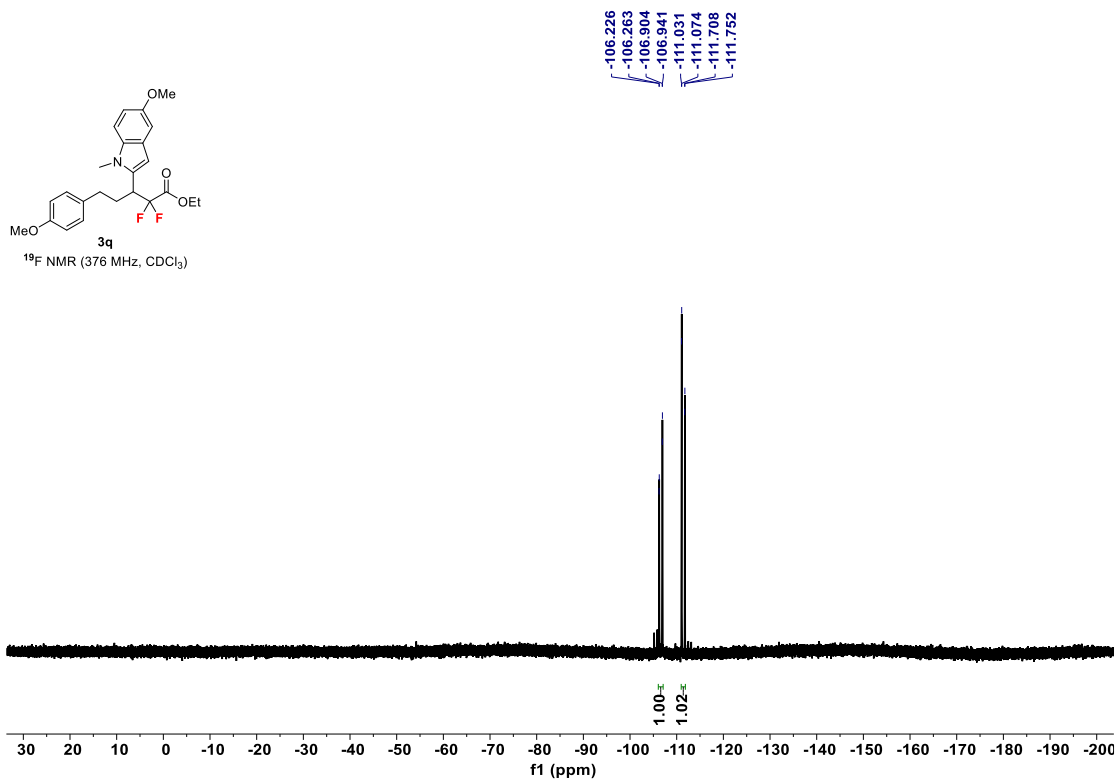

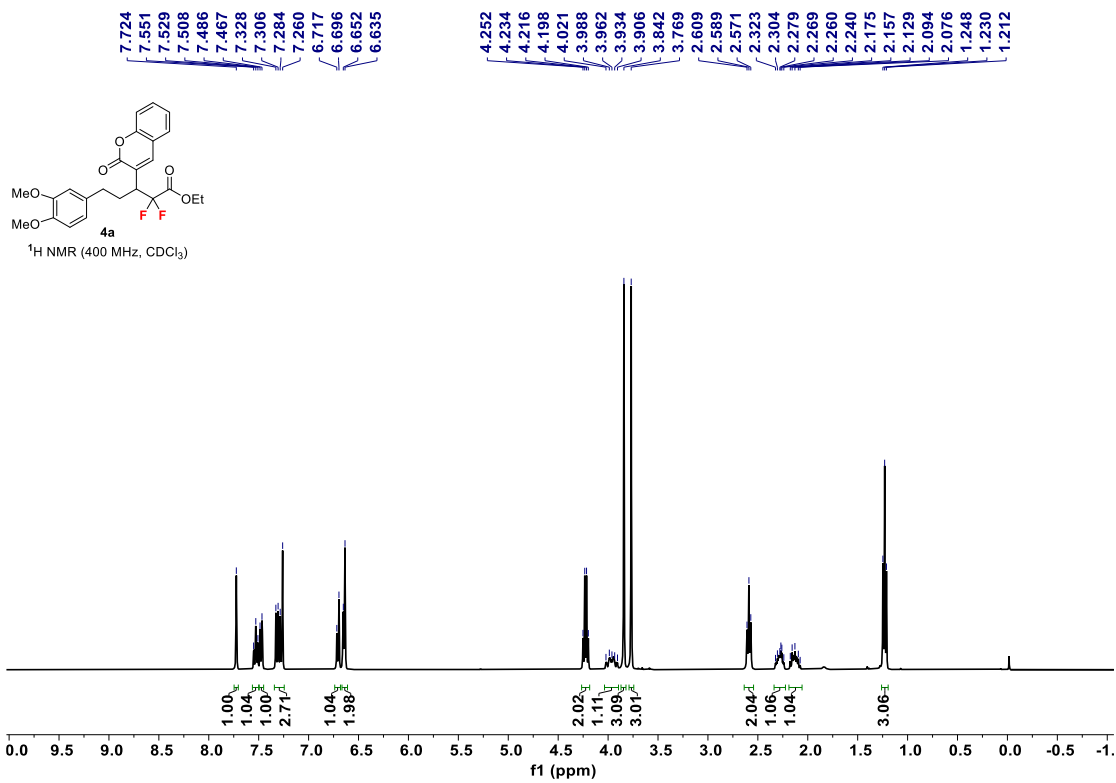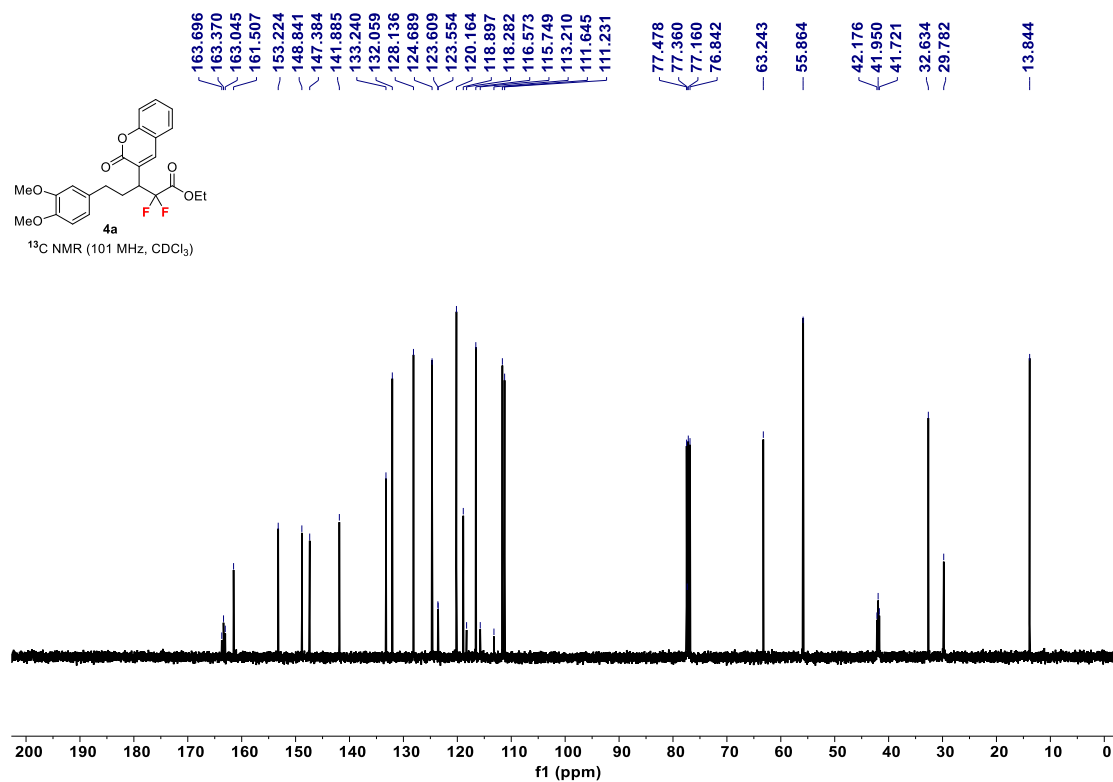

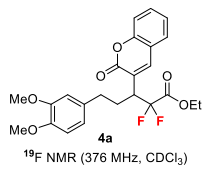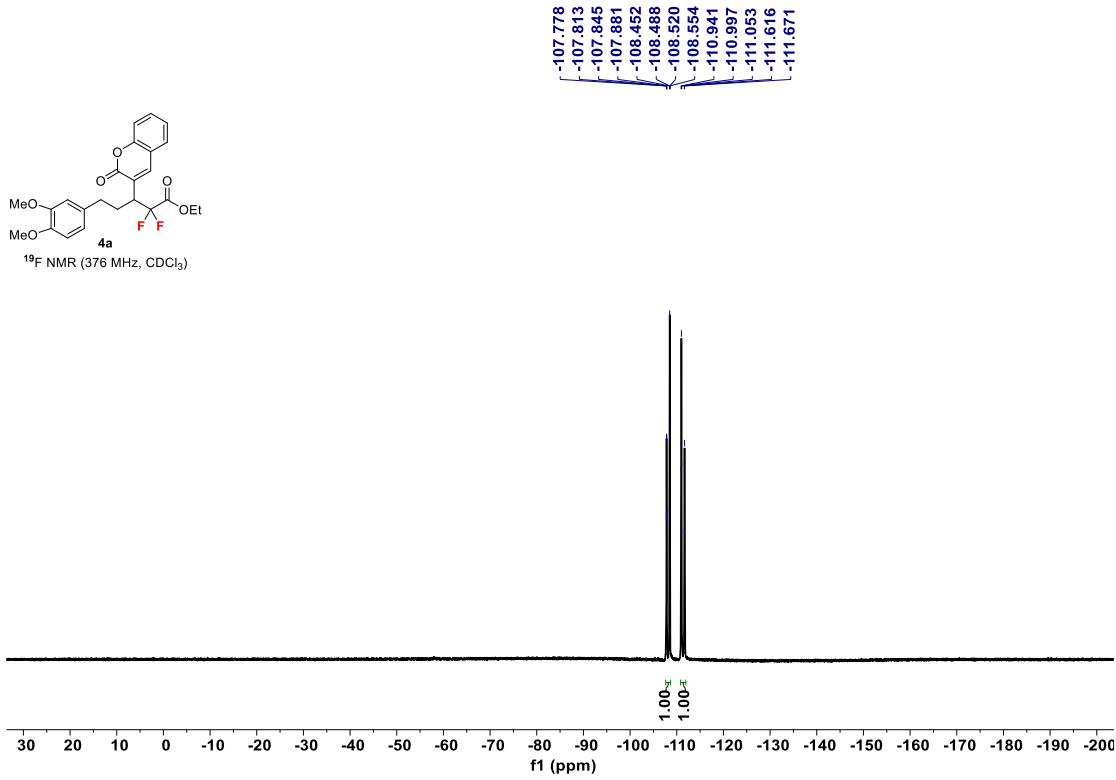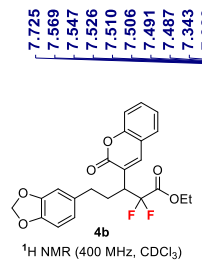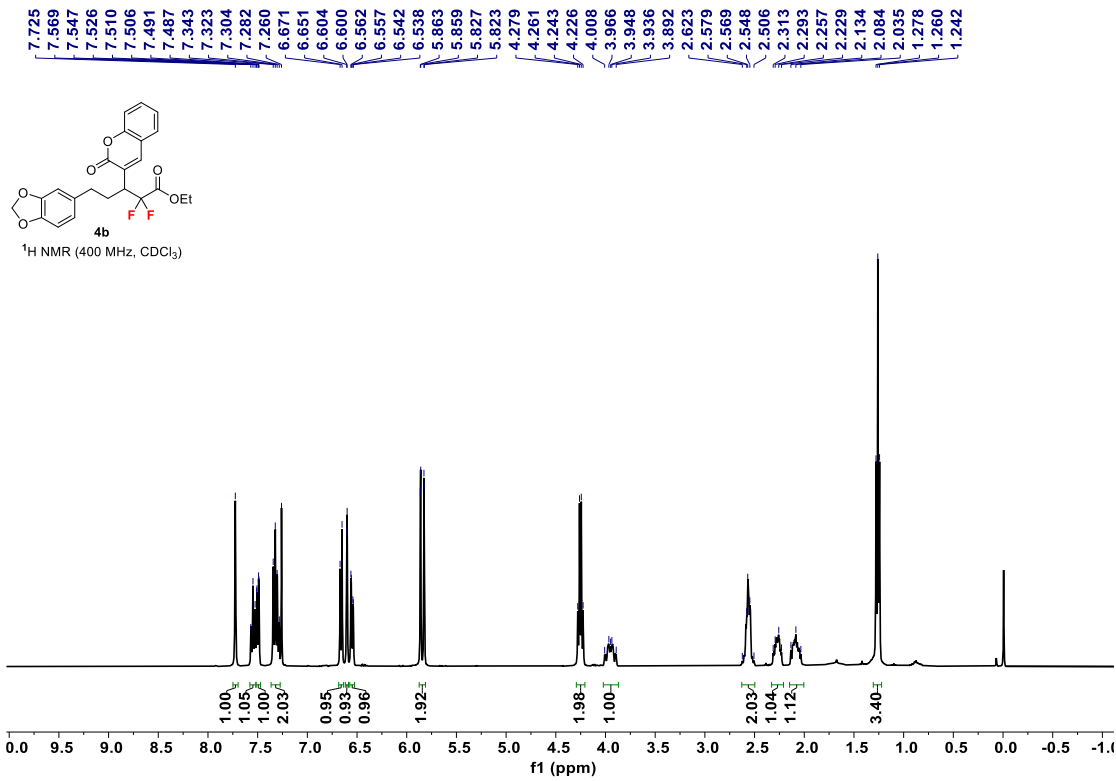

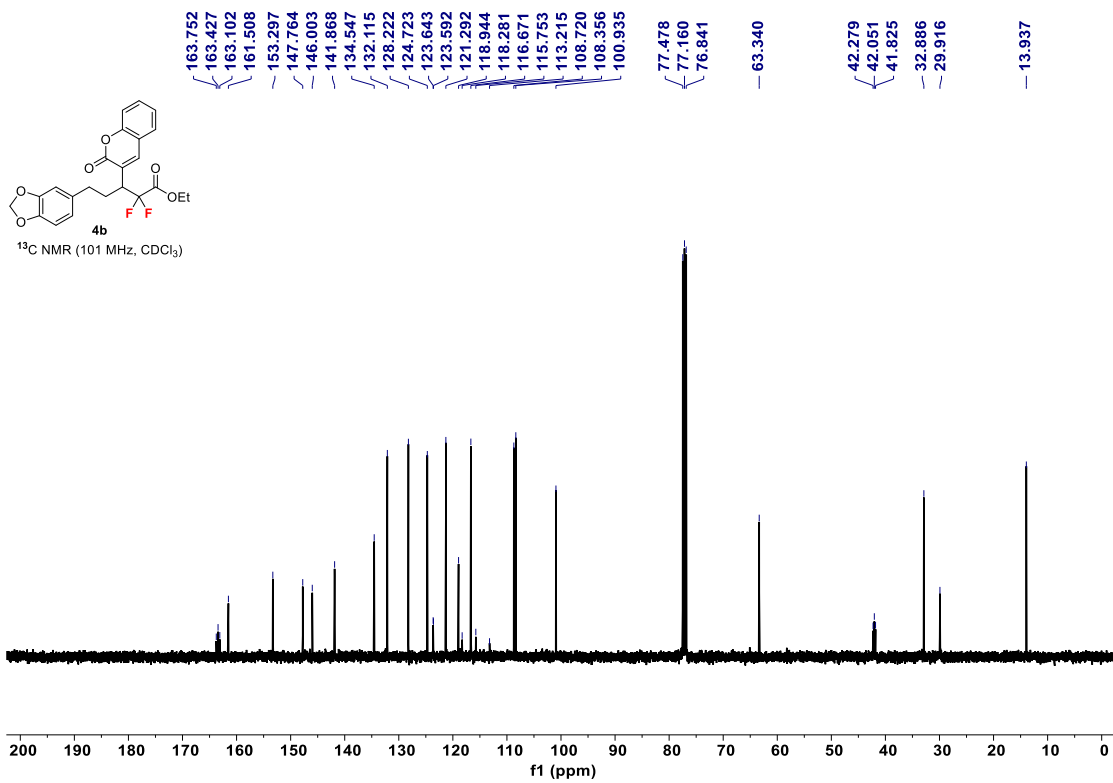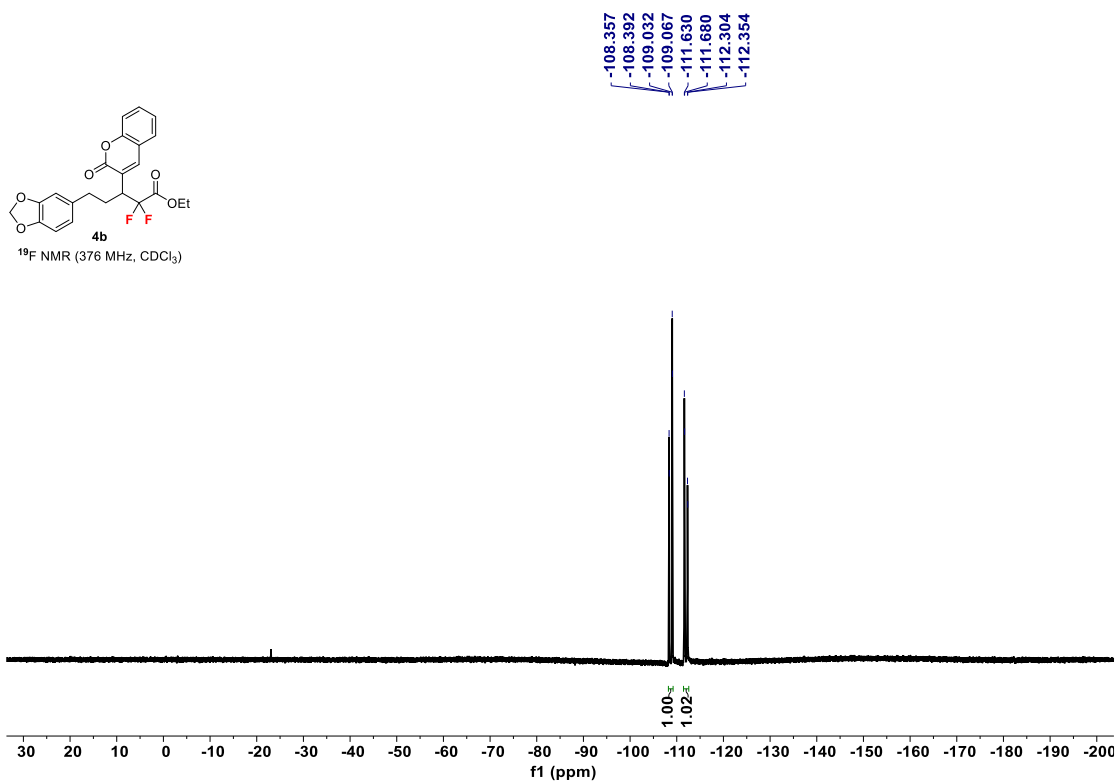

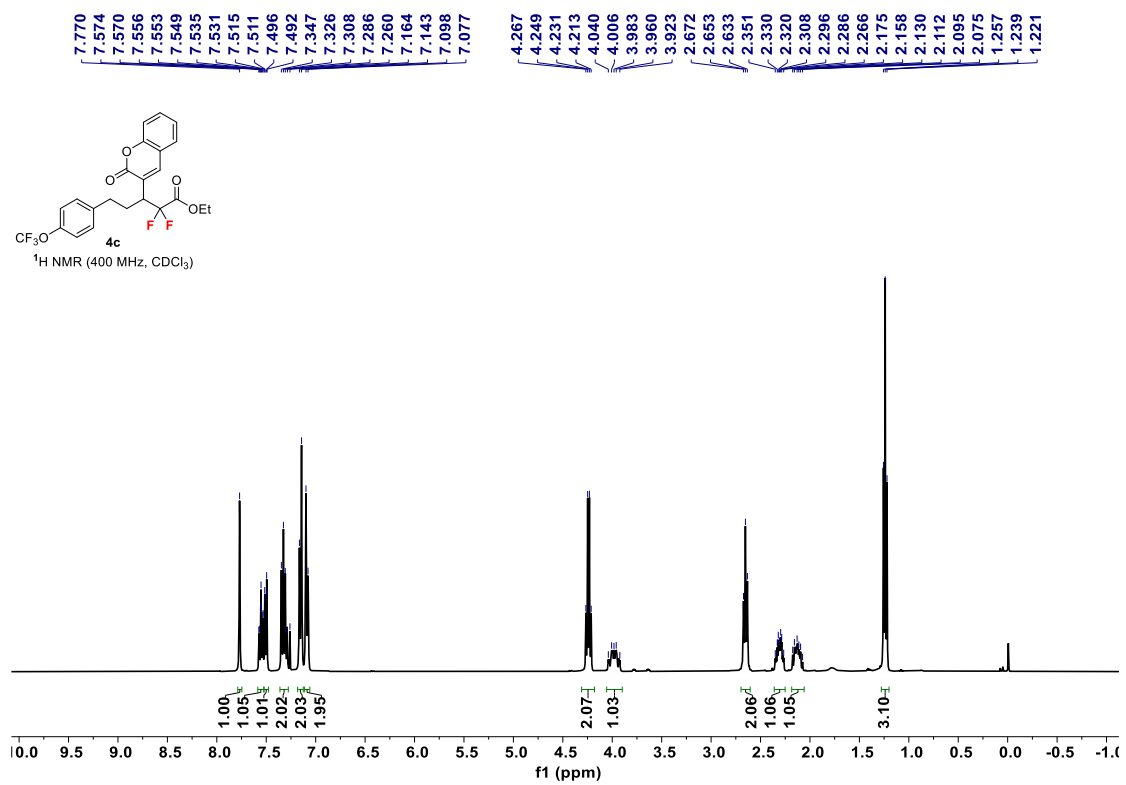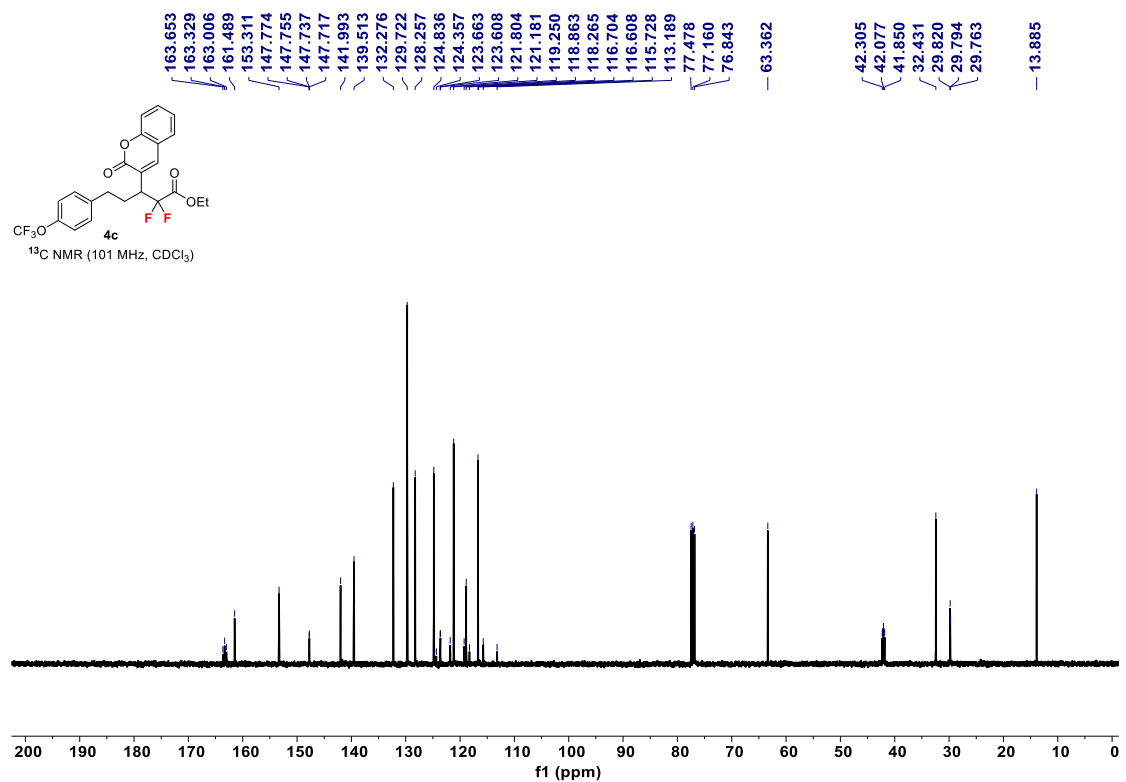

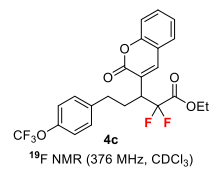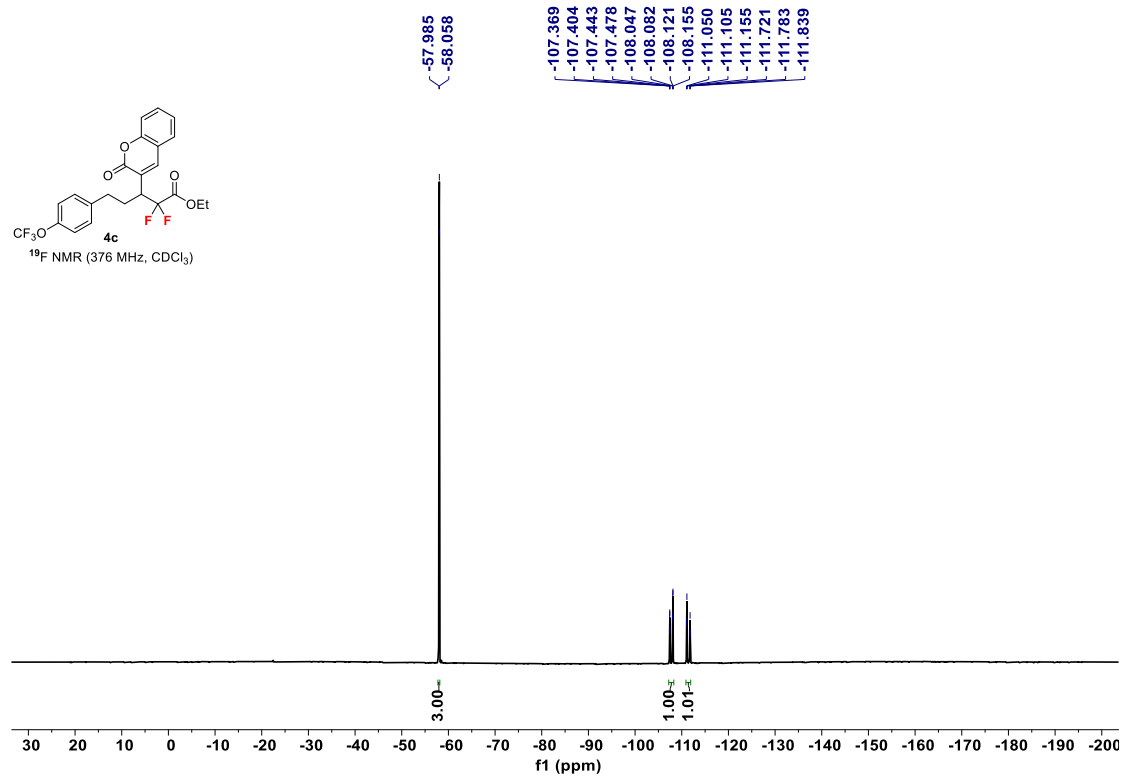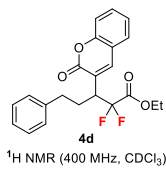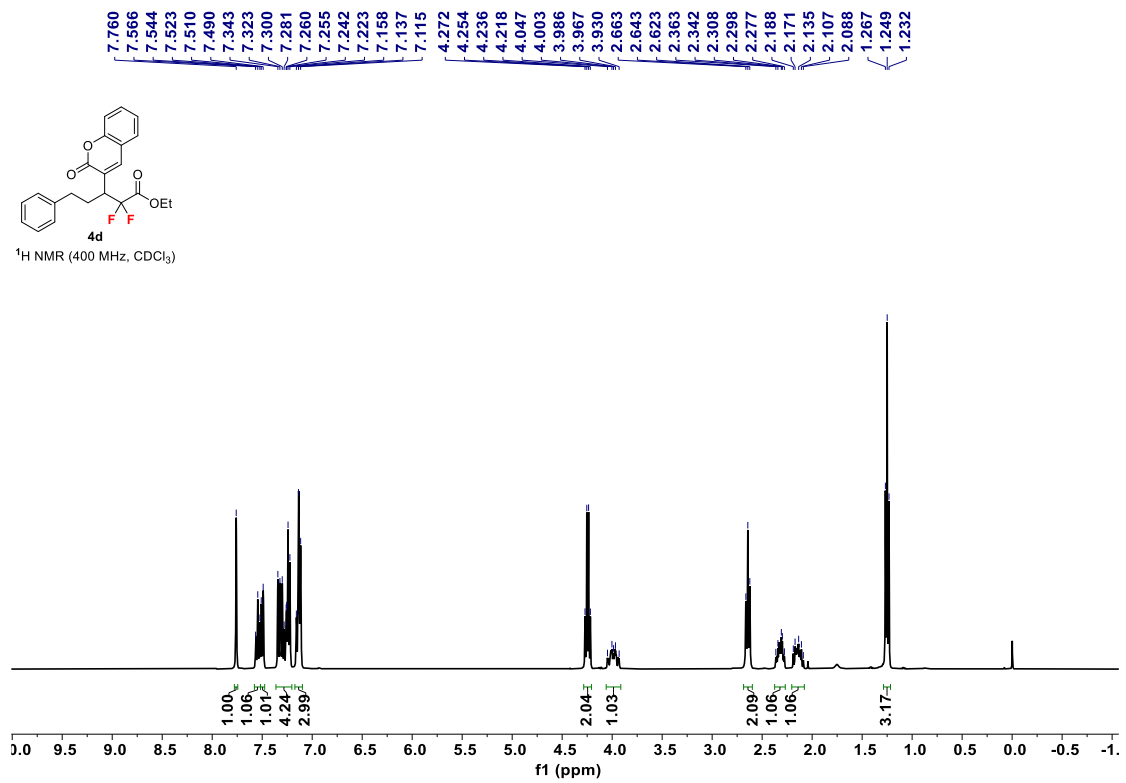

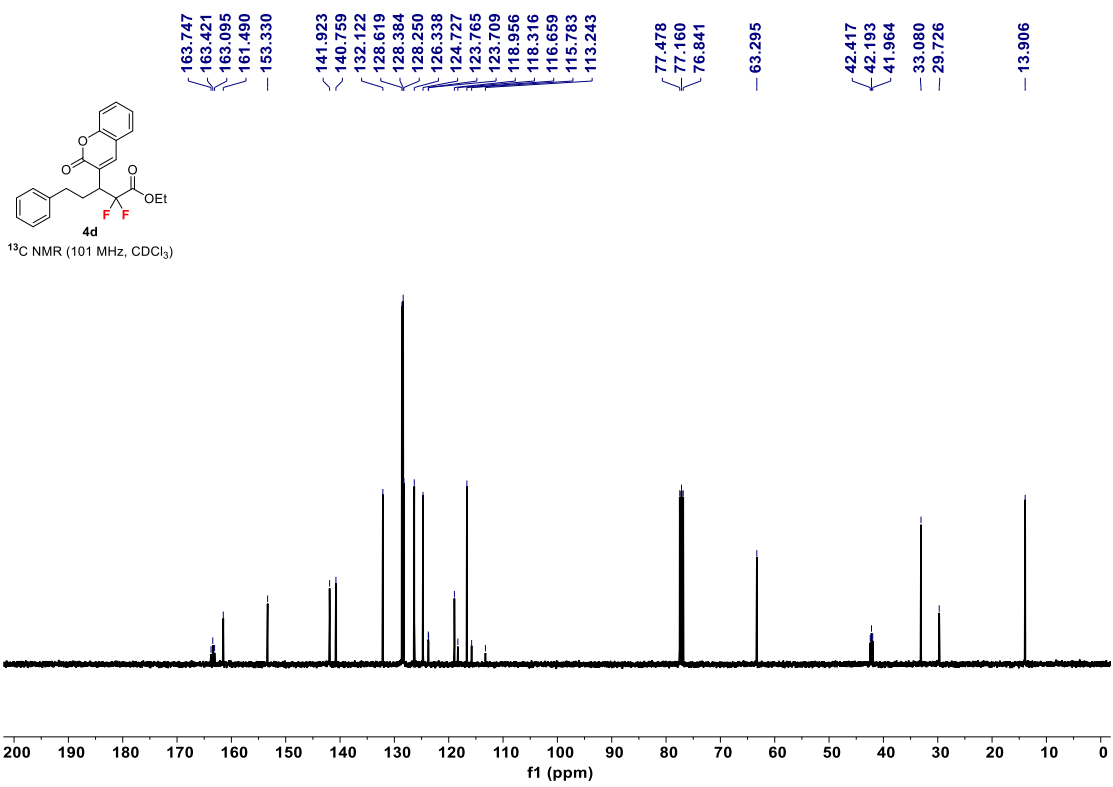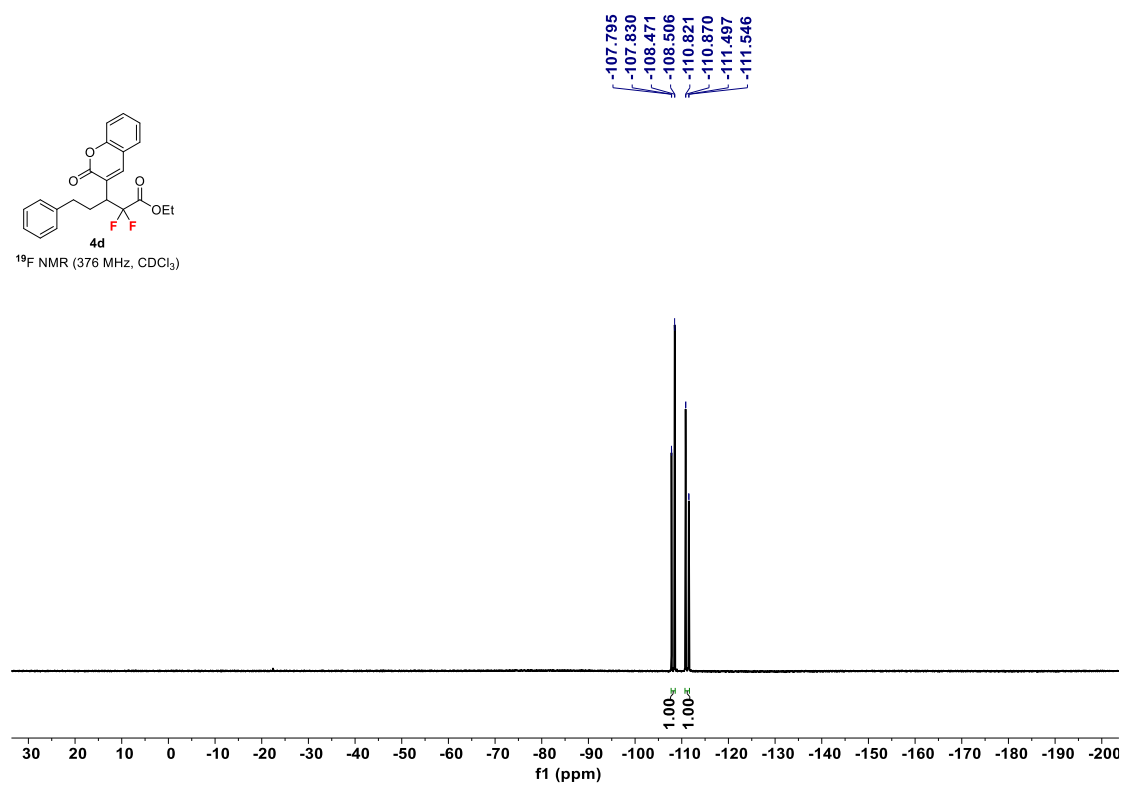

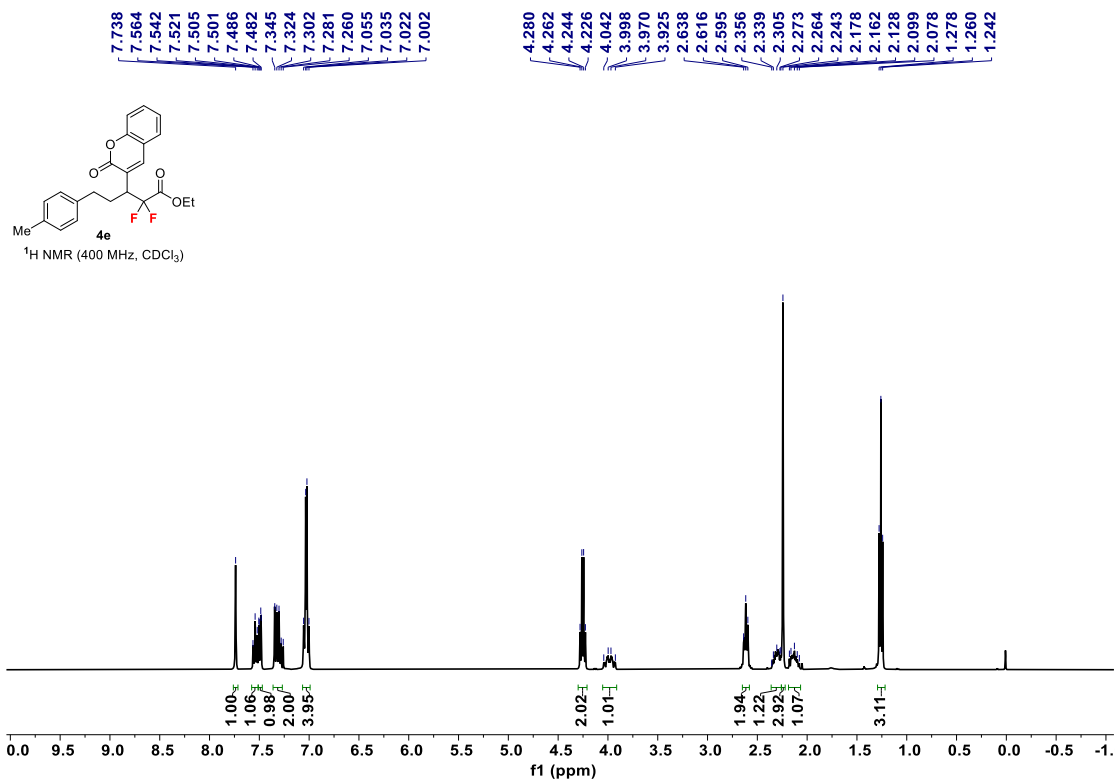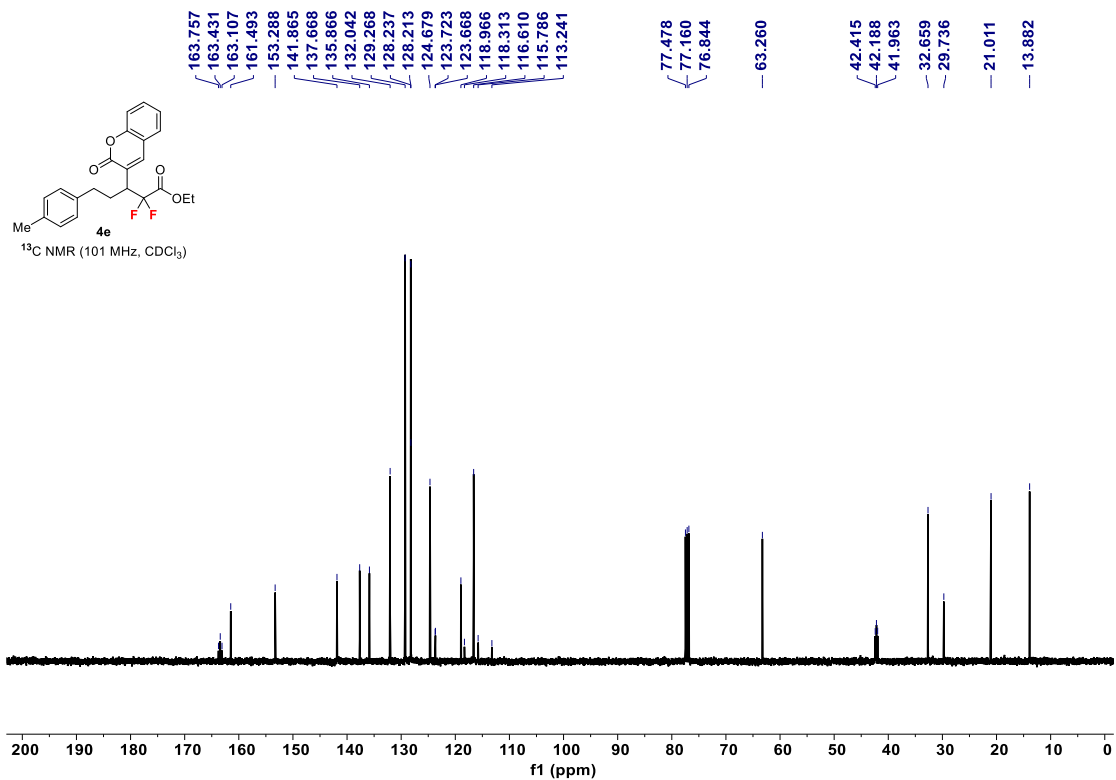



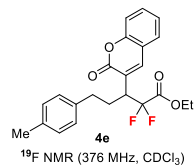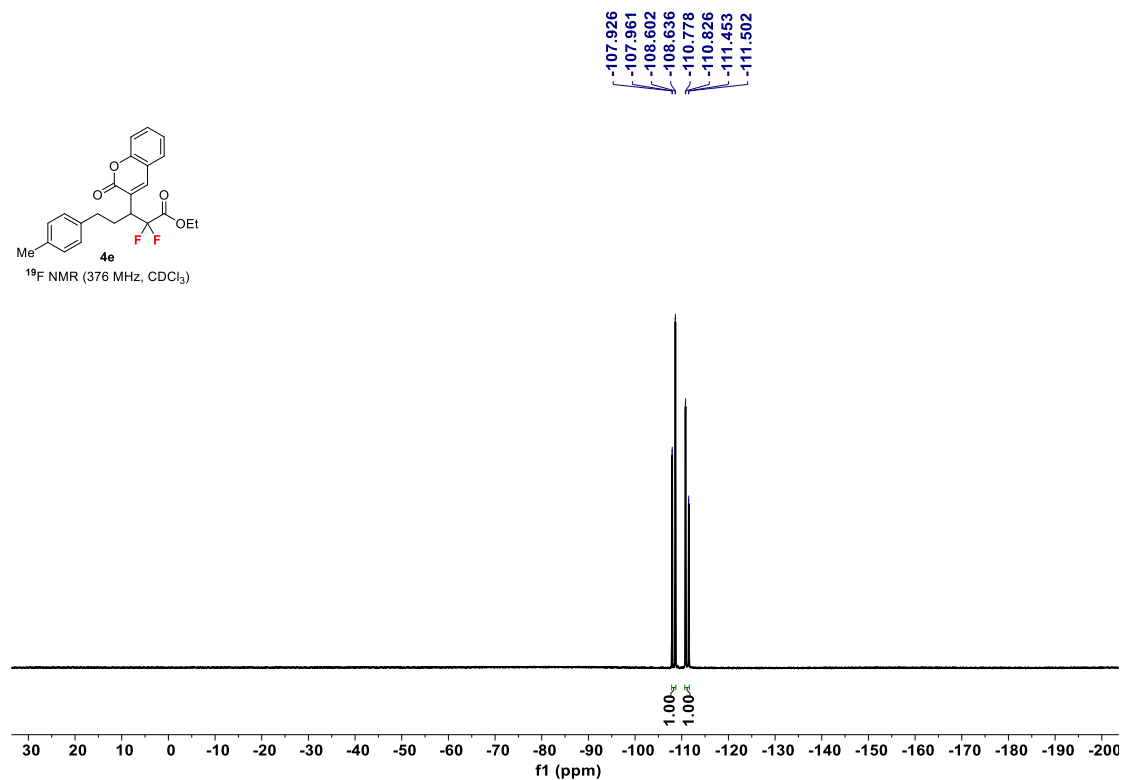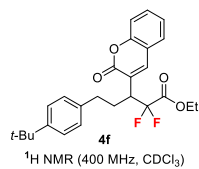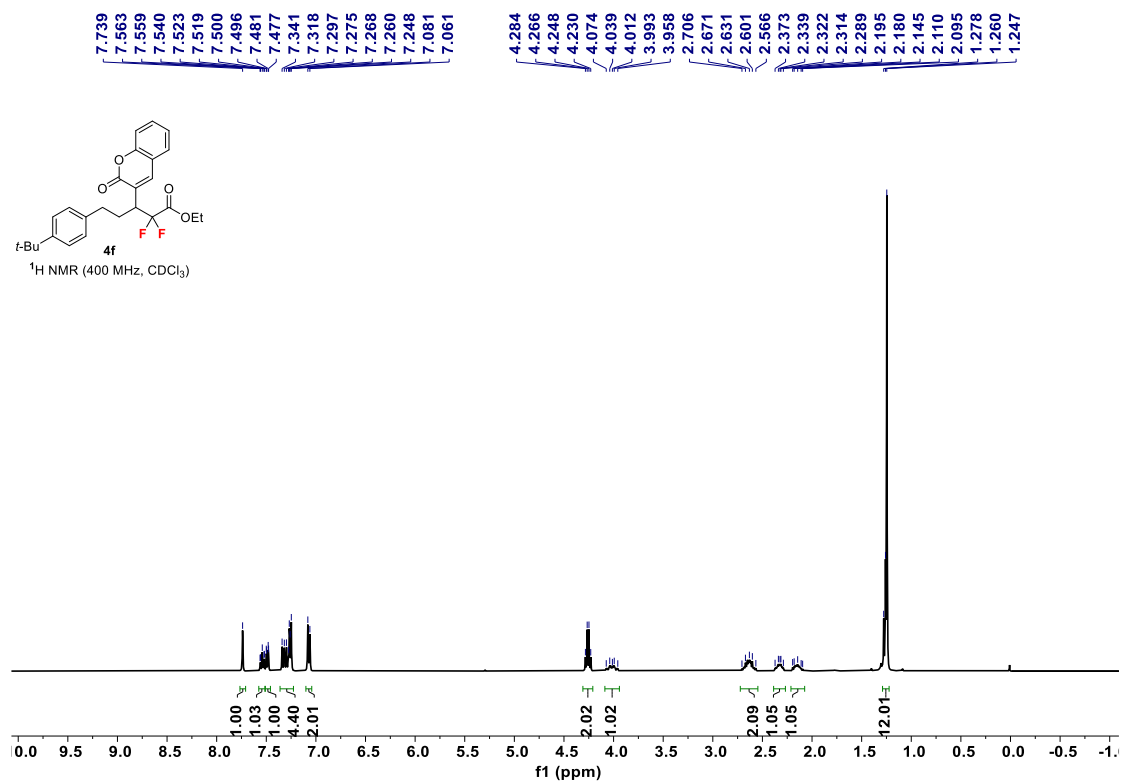

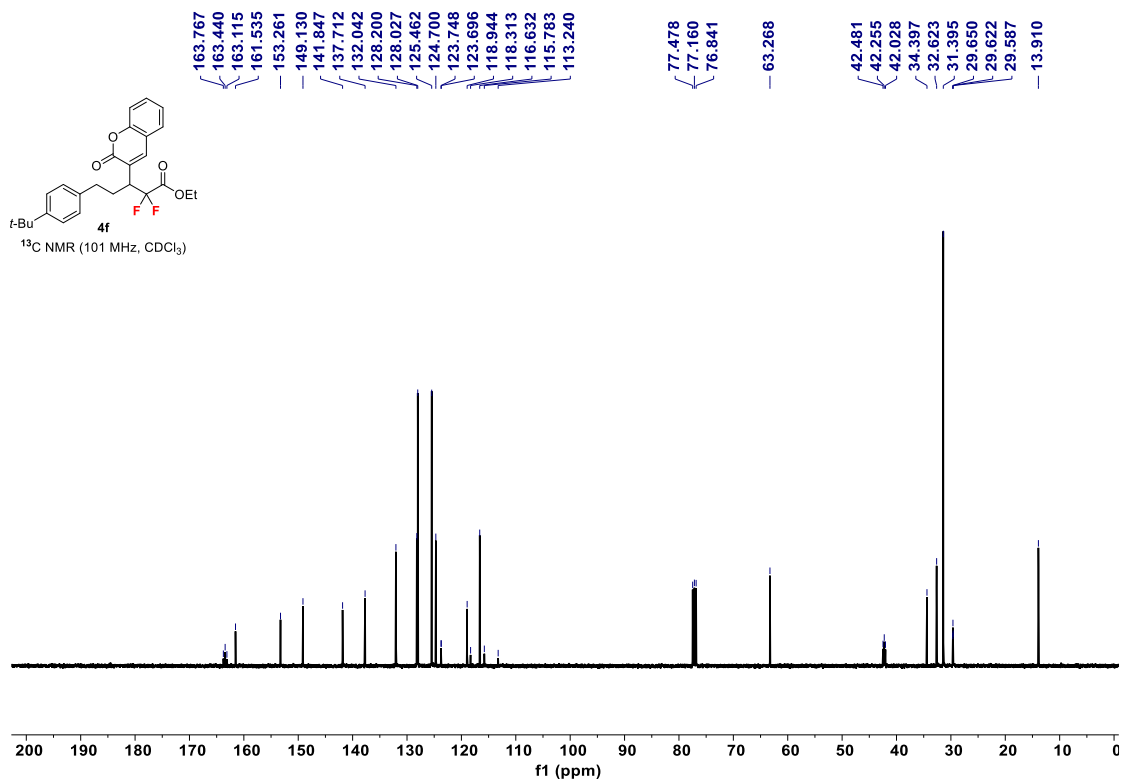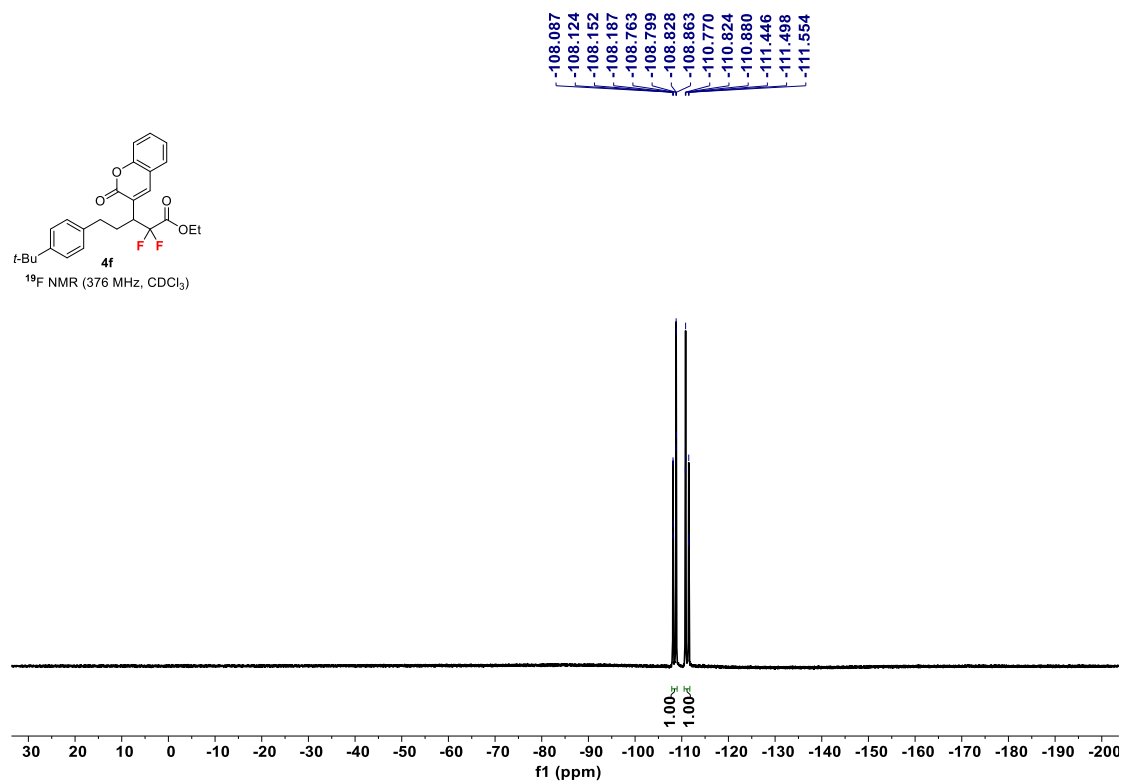

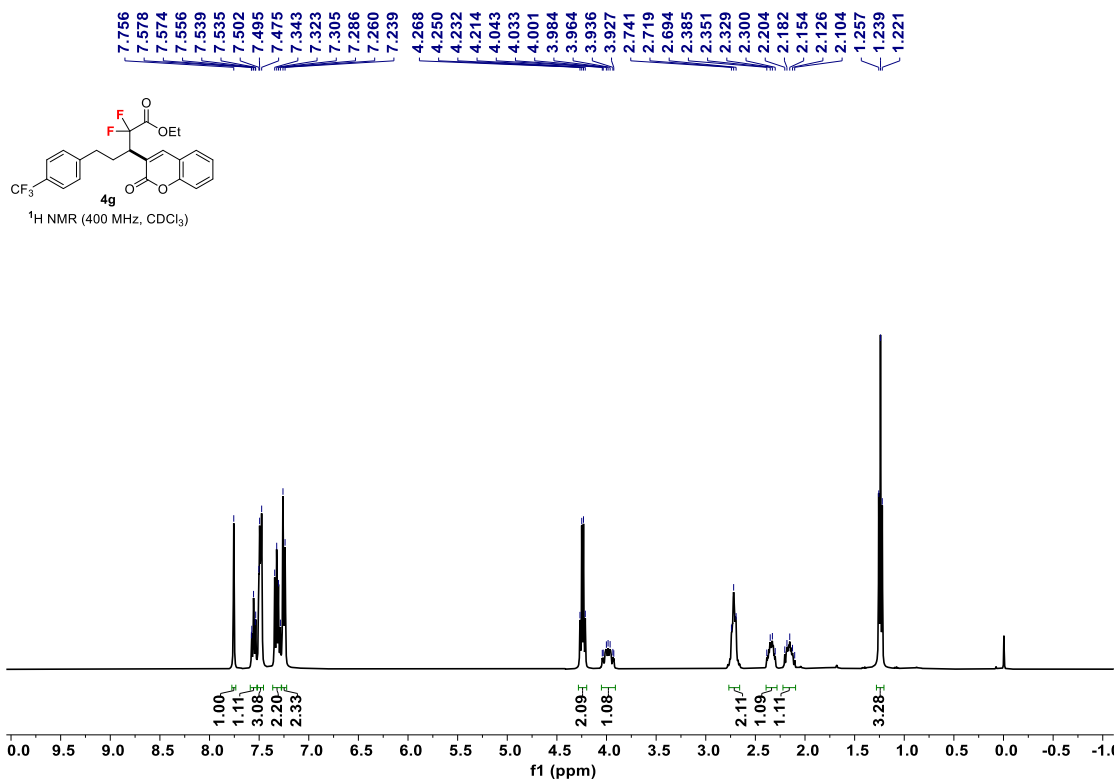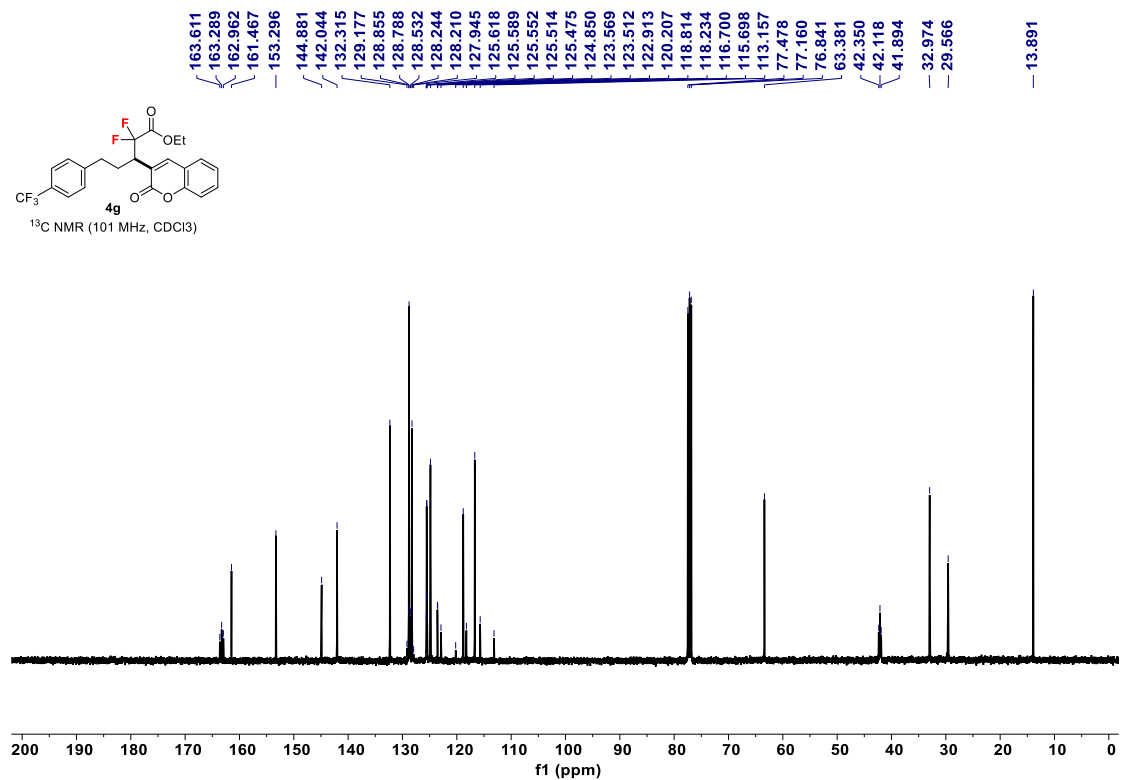

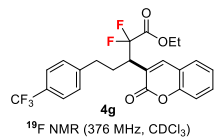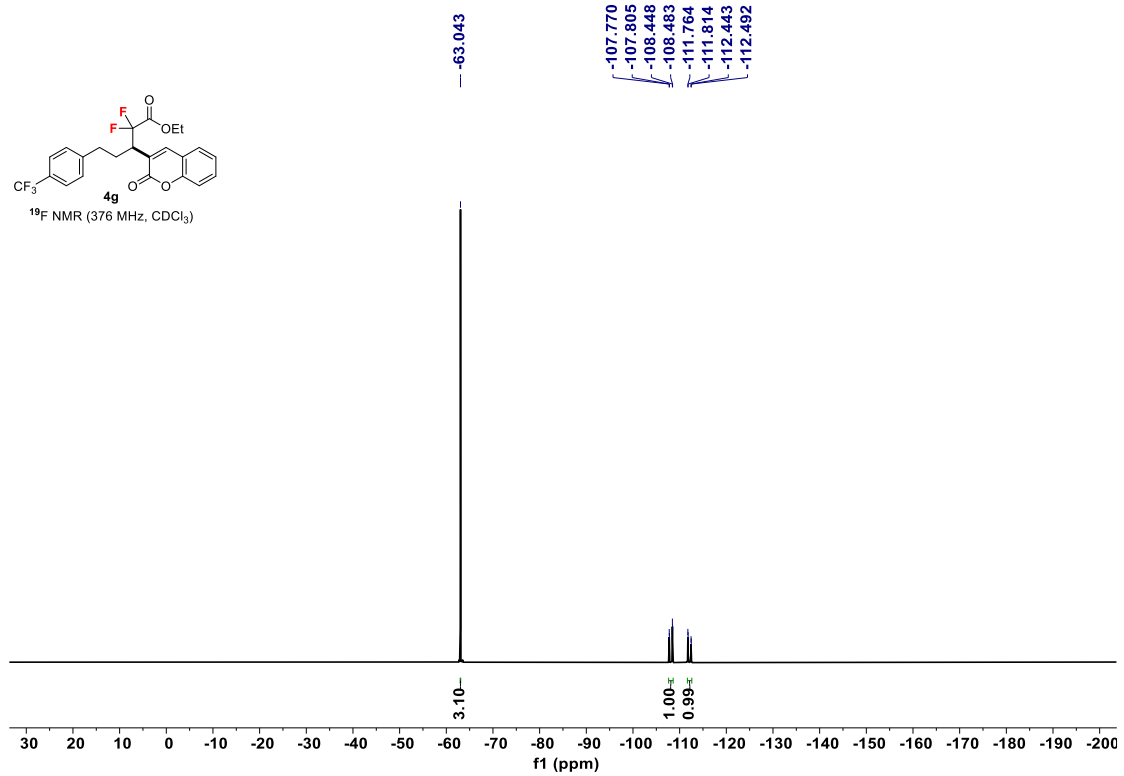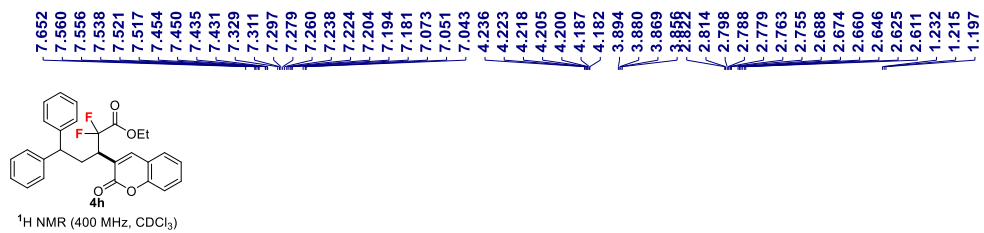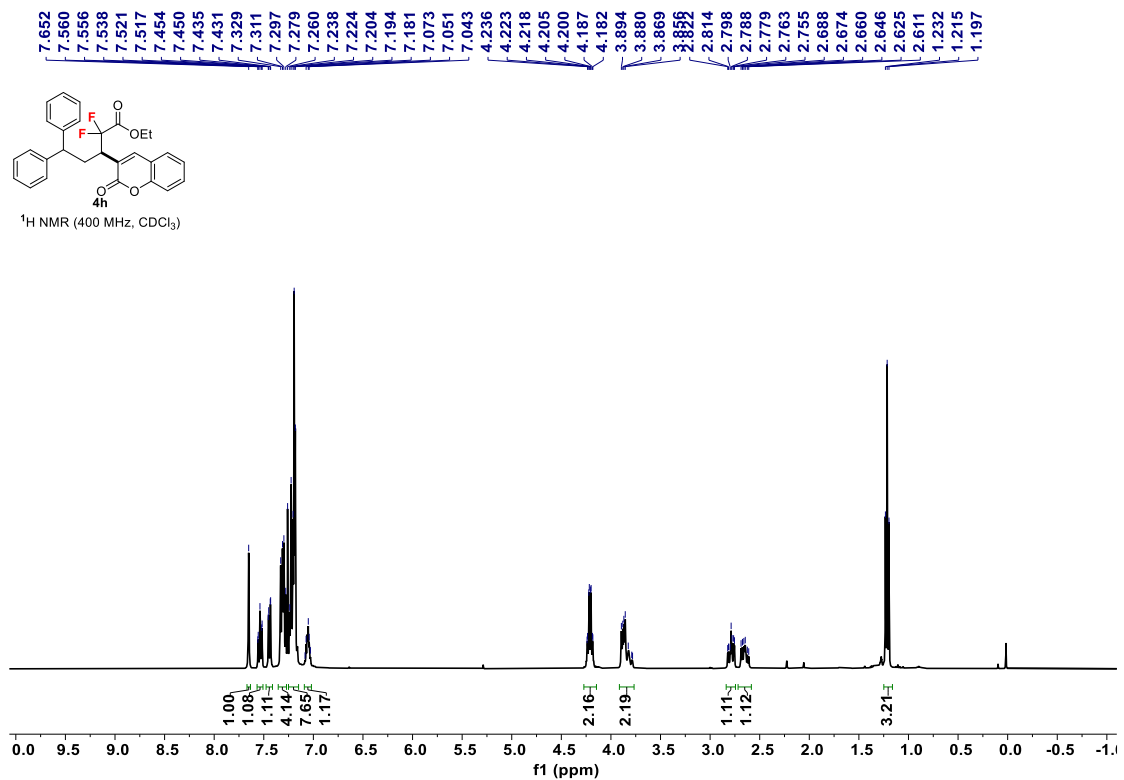

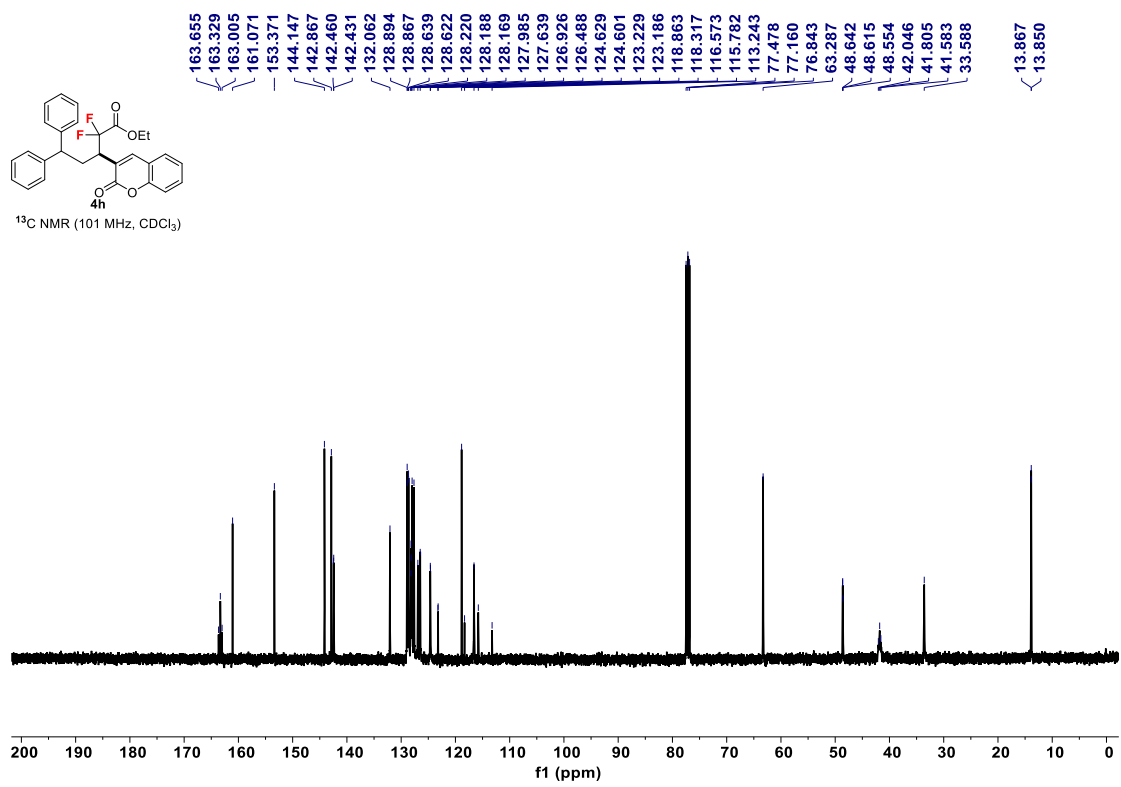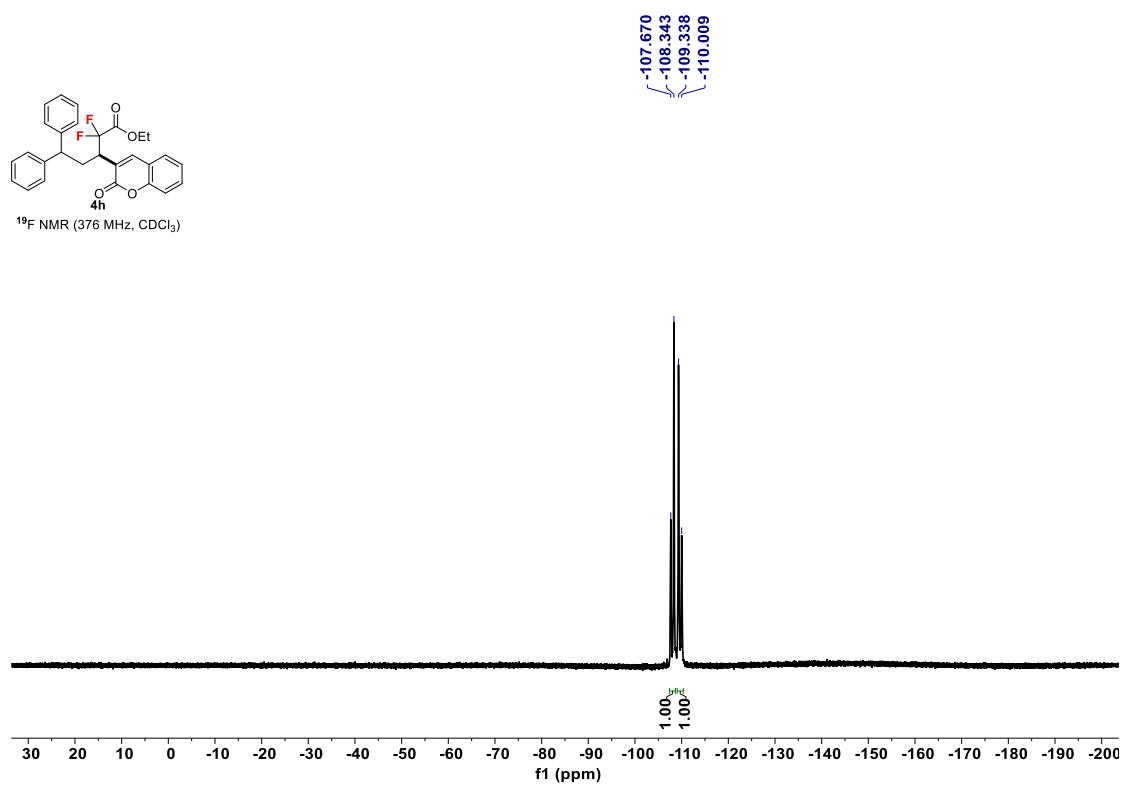

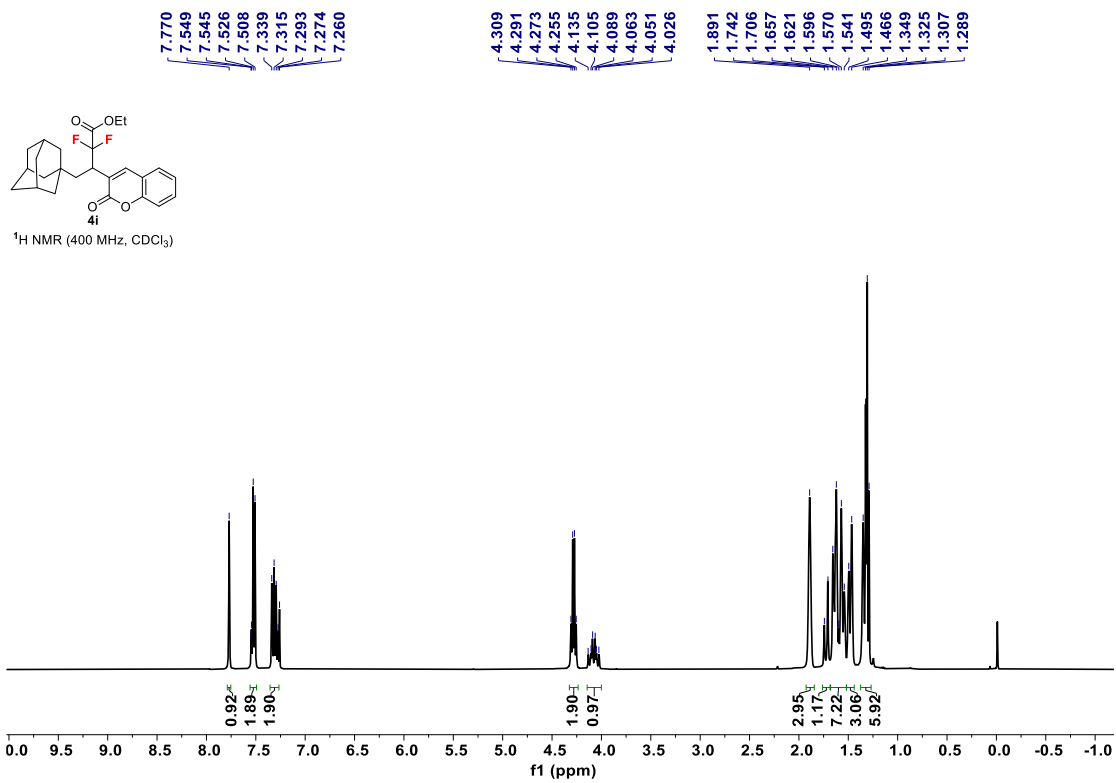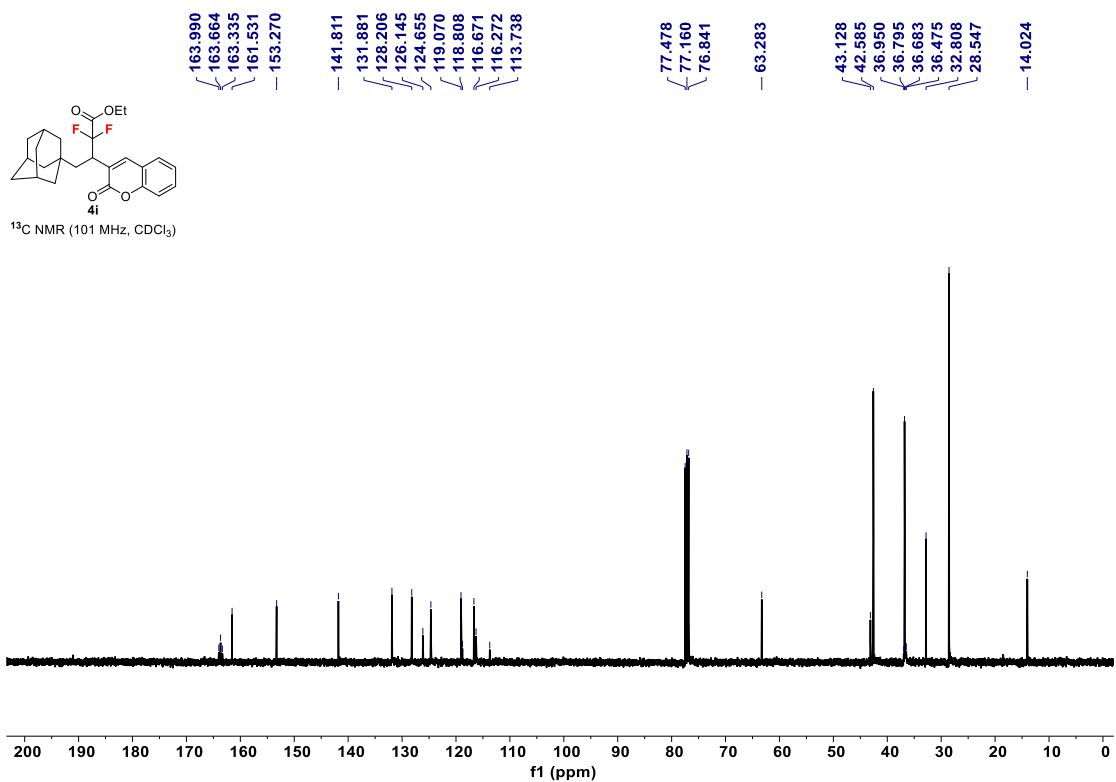

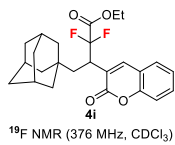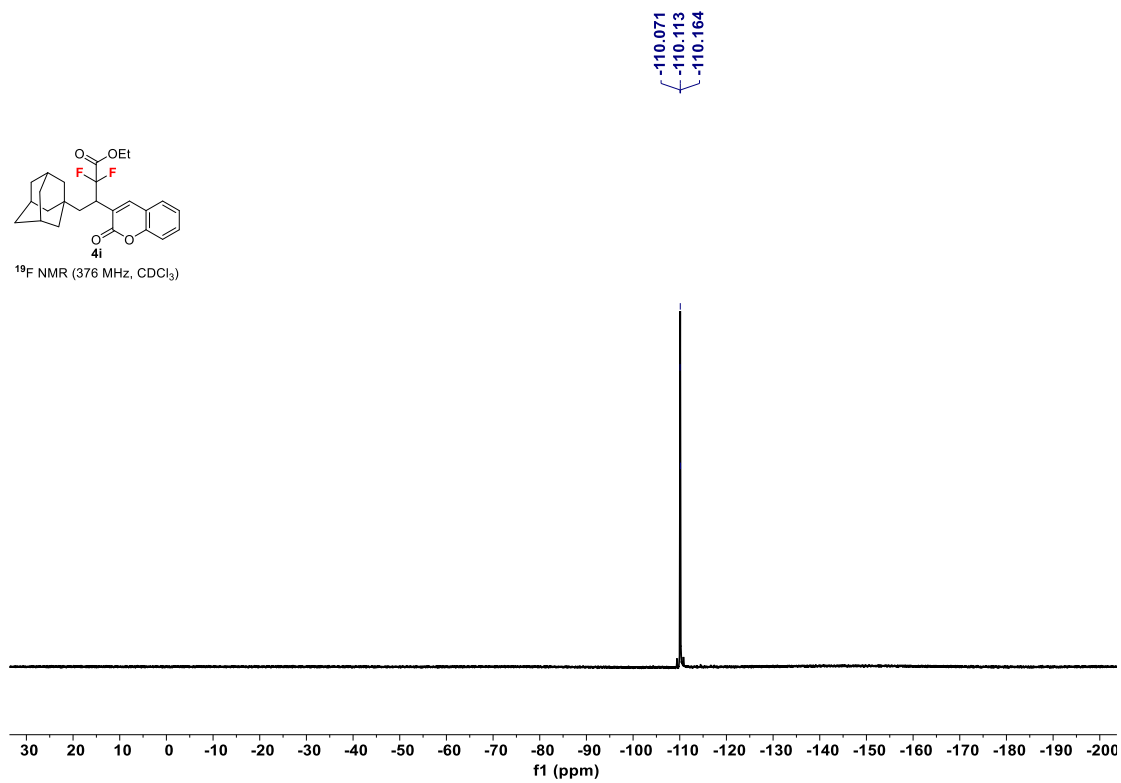

7.733  
 7.546  
 7.542  
 7.521  
 7.502  
 7.324  
 7.304  
 7.286  
 7.266  
 7.260  
 4.326  
 4.308  
 4.299  
 4.281  
 4.270  
 4.263  
 4.252  
 4.235  
 4.225  
 4.208  
 4.128  
 4.091  
 4.024  
 4.010  
 1.858  
 1.827  
 1.792  
 1.779  
 1.757  
 1.746  
 1.733  
 1.714  
 1.690  
 1.647  
 1.607  
 1.575  
 1.296  
 1.278  
 1.260  
 1.193  
 1.144  
 1.116  
 1.094  
 1.060  
 1.000  
 0.989  
 0.960  
 0.932  
 0.900  
 0.879  
 0.841  
 0.810  
 0.782

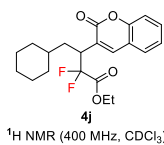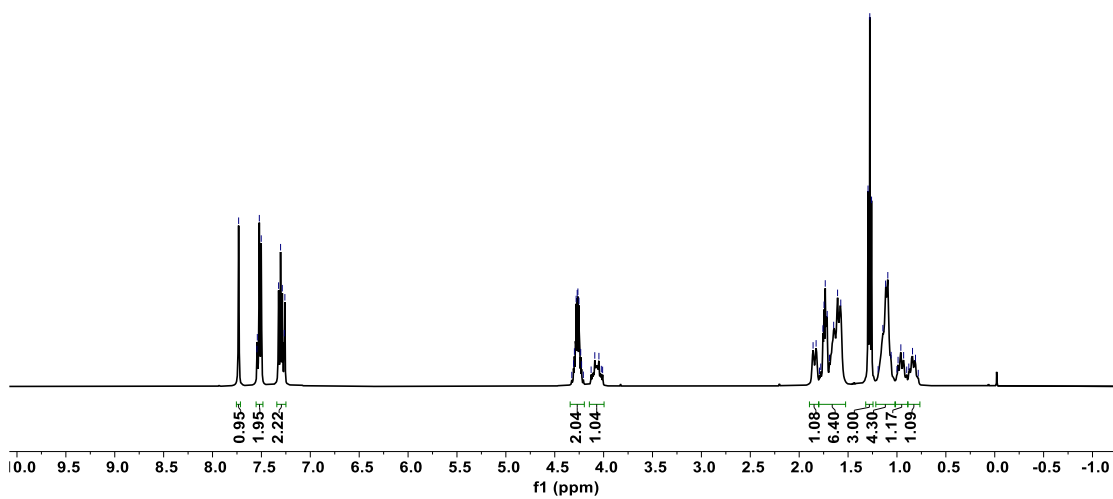

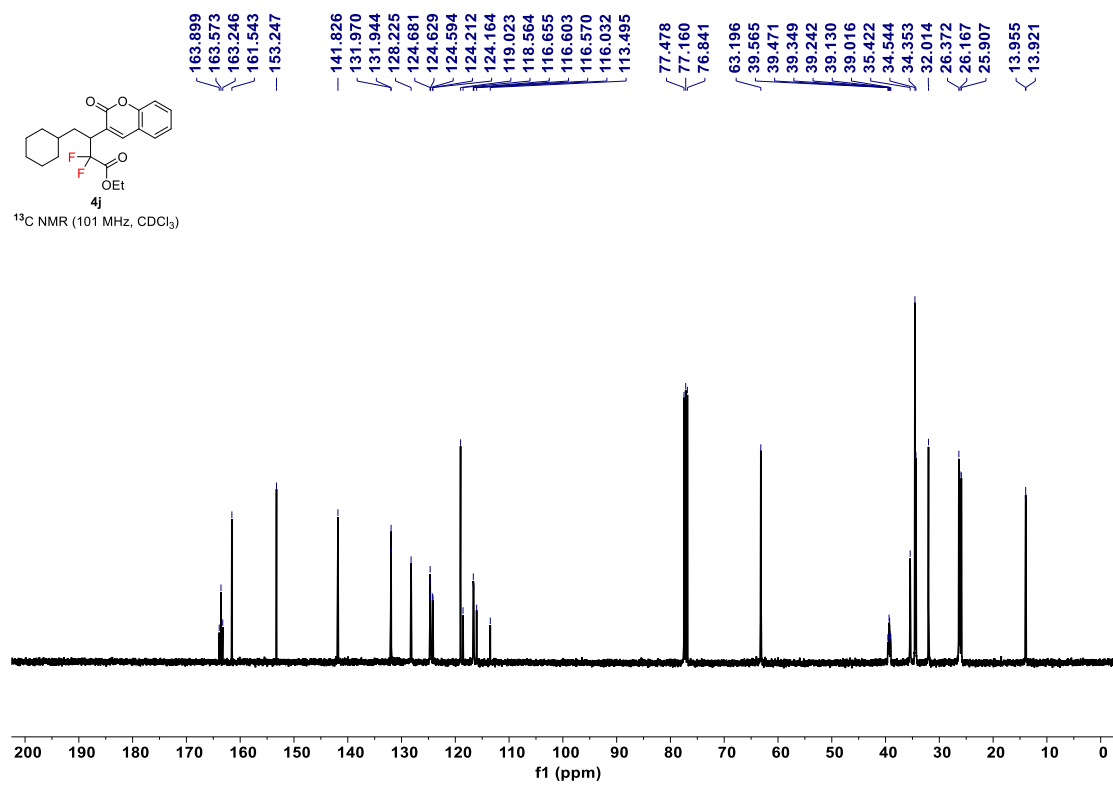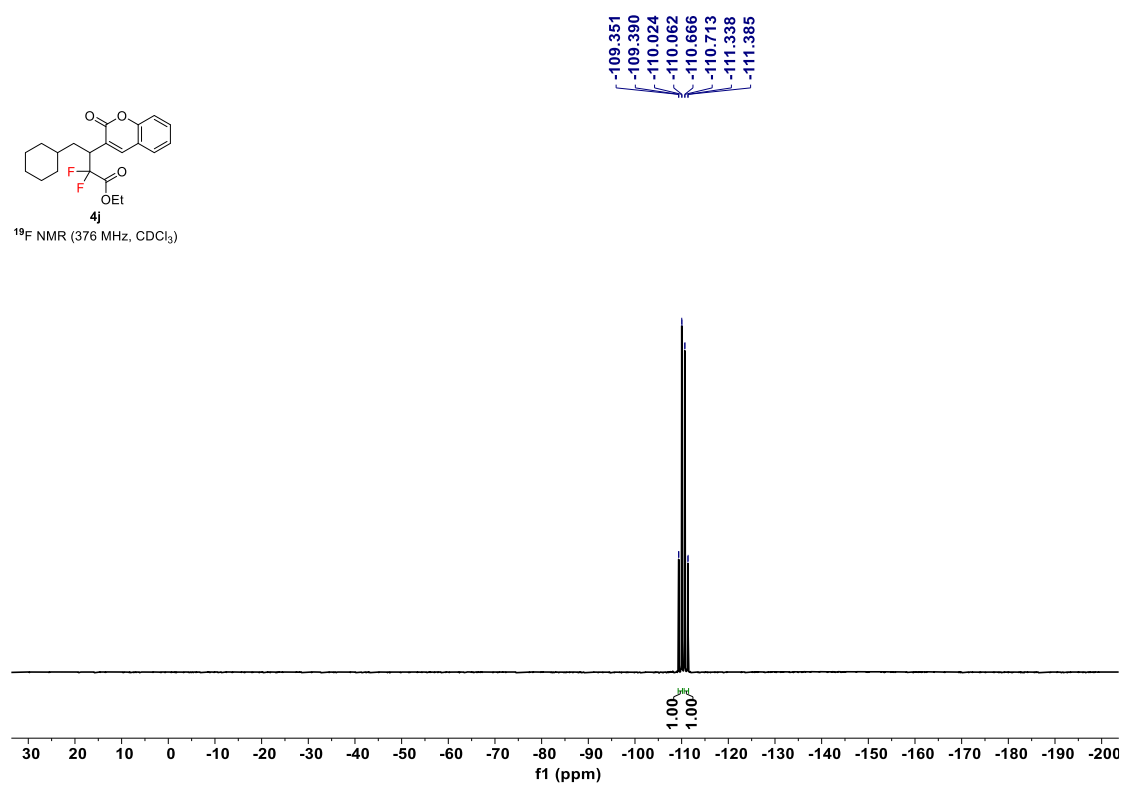



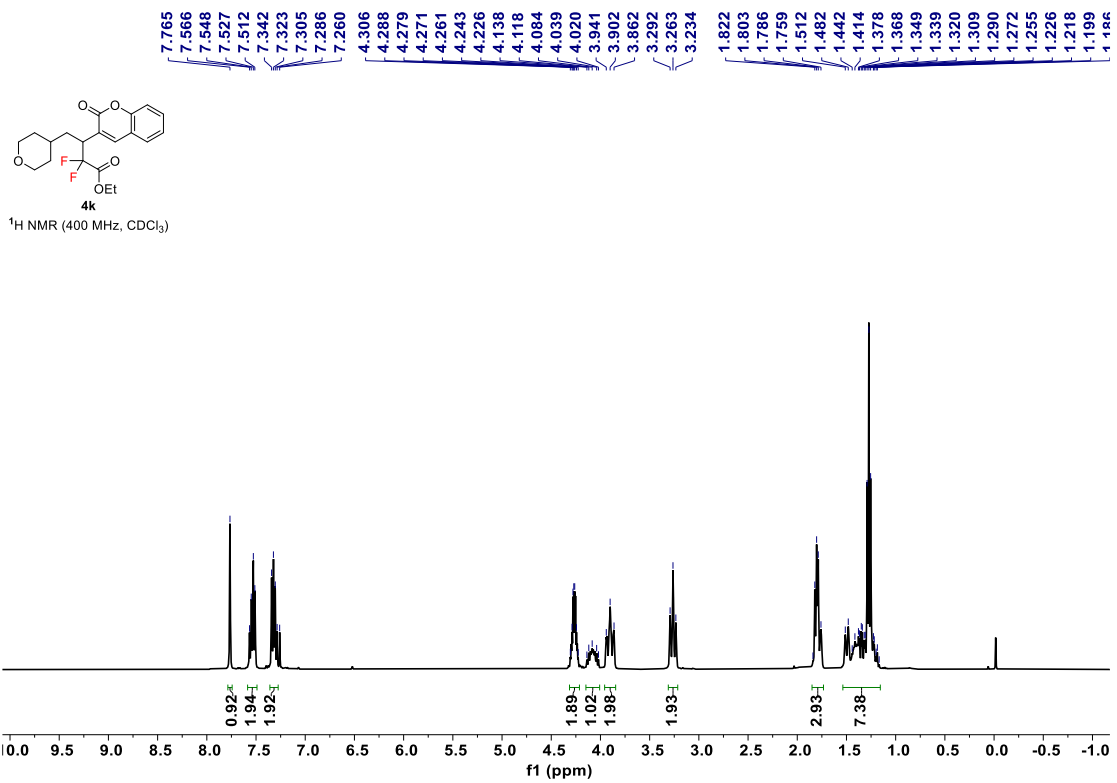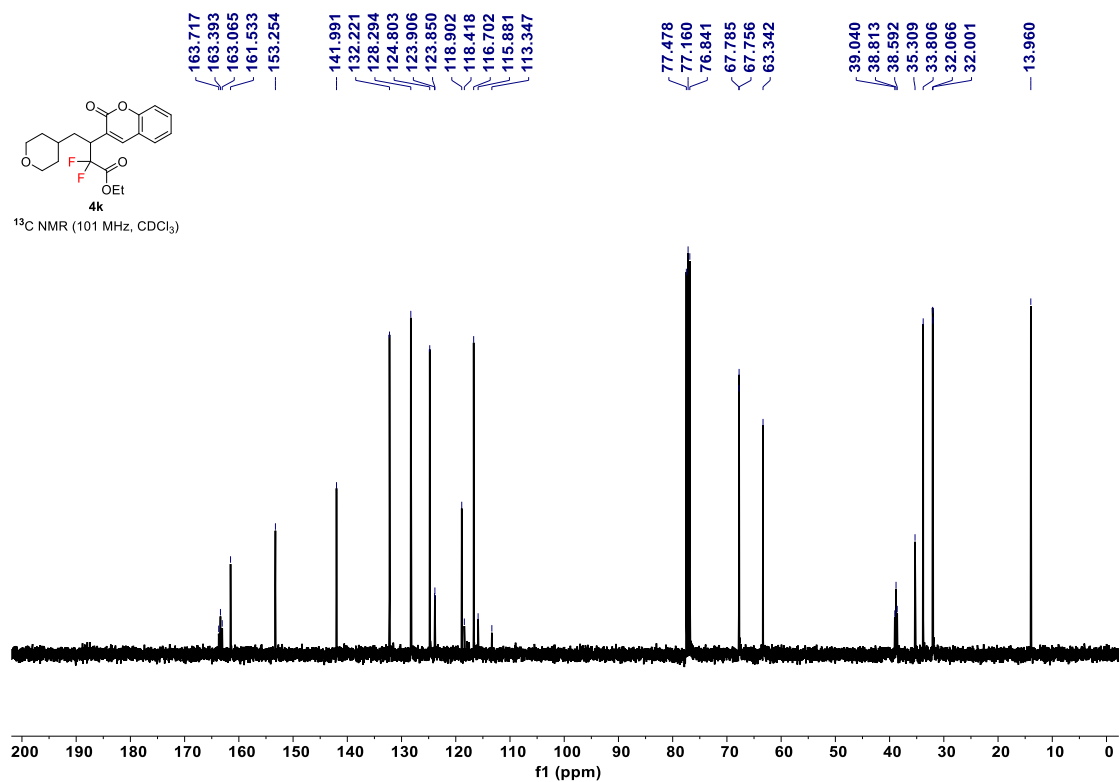

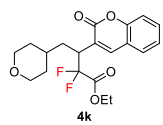

<sup>19</sup>F NMR (376 MHz, CDCl<sub>3</sub>)

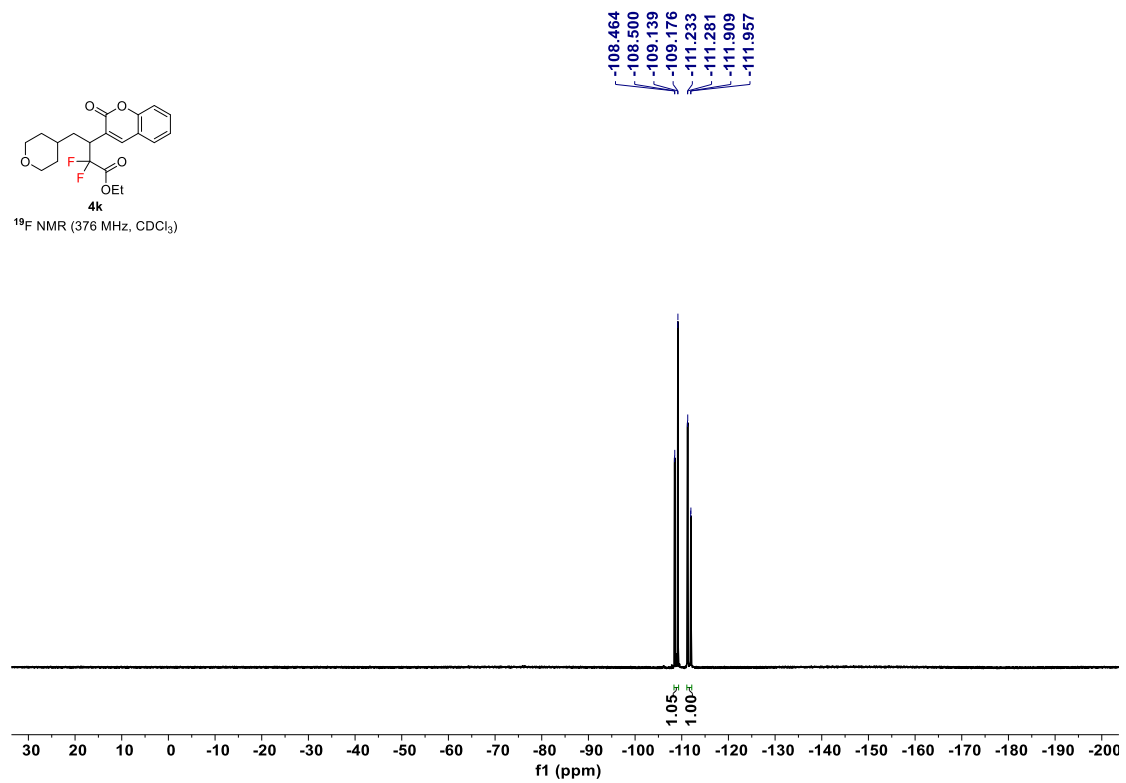

Supplement: d4qo00484a1.pdf [file d4qo00484a1.pdf]
